# Supplementary material for: Landscape analysis of environmental, social and governance (ESG) investing metrics for consumer nutrition and health in the food and beverage sector
Source: HighWire-hosted journal article supplement (doi:10.1136/bmjnph-2022-000600), 2023-08-24
Supplement: bmjnph-2022-000600supp001_data_supplement.pdf [file bmjnph-2022-000600supp001_data_supplement.pdf]

## Supplementary Materials

### Text

Text S1. Characteristics of an ideal, material metric in each ESG-Nutrition domain

Text S2. ESG-Nutrition metric findings within domains

Text S3. ESG-Nutrition metric findings by ESG framework

### Figures

Figure S1. Intercorrelation of scoring attributes across 529 ESG-Nutrition metrics.

### Tables

Table S1. Overview of ESG frameworks, adapted from Robinson *et al.* 2022

Table S2. Mean scores of 529 ESG-Nutrition metrics, grouped by ESG framework

Table S3. Attribute scoring and rationale for illustrative\* ESG-Nutrition metrics across four domains

Table S4. Scoring results for 401 unique ESG-Nutrition metrics

**Text S1. Characteristics of an ideal, material metric in each ESG-Nutrition domain**

Product healthfulness metrics should quantify the healthfulness of the company's product portfolio using a scientifically validated, comprehensive nutrient profiling system (NPS) of company outputs, that is amendable to assess changes over time. Product distribution and equity metrics should quantify the relative affordability and accessibility of healthful vs. less healthful products within a portfolio or in comparison to competition, as well as changes over time, with healthfulness defined using an externally-validated NPS. Product marketing metrics should quantify adherence to international standards of marketing and quantify spending towards marketing of healthful products vs. less healthful products (based on a validated NPS). Product labeling metrics should quantify coverage, quality, and transparency of nutrition labeling, based on a validated NPS. Finally, nutrition-related governance metrics should quantify performance or outputs of the company related to relevant governance components (listed above), with a focus of driving consumption of healthful products for improving human health.

**Test S2. ESG-Nutrition metric findings within domains**

Within each of the 4 ESG-Nutrition domains, attribute scoring within product healthfulness was highest for activity (2.17[0.85]) and verifiability (2.02[0.73]) and lowest for resolution (1.58[0.93]) and alignment (1.40[0.83]) (**Table 2, Figure 2-3**). Attribute scoring within the product distribution and equity domain was highest for verifiability (2.48[0.71]) and materiality (2.28[0.74]), but lowest for alignment (1.14[0.68]) and resolution (1.03[0.42]). For both product marketing and labeling and nutrition-related governance, metrics within these domains scored highest for verifiability (2.50[0.75] and 2.40 [0.73], respectively) and objectivity (2.15 [0.76] and 2.39 [0.78], respectively) but lowest for resolution (1.24[0.80] and 1.07[0.54], respectively) and alignment (1.53[0.87] and 1.15[0.67], respectively).

**Text S3. ESG-Nutrition metric findings by ESG framework**

Metric scoring was similarly heterogenous across the 8 ESG frameworks (**Table S2, Figure 2-3**). Total scores were highest for SASB (13.2 [1.39]) and PUP (11.67 [1.04]), and lowest for ATNI UK (10.52[1.21]) and BIA-Obesity (10.77[1.27]). Mean materiality score was highest for GRI PF (2.33 [0.72]) and WBA (2.29 [0.74]), while lowest for GRI (1.00 [0.00]) and SASB (1.47 [0.86]). Objectivity scores were similarly highest for SASB and BIA-Obesity (both 2.33), and similarly lowest for GRI PF and PUP (both 1.83). Mean alignment scores were consistently low, with SASB the only framework with mean score above 2 (2.07[0.94]), and both GRI PF and PUP with all metrics scoring 1. Mean activity score were high for SASB (2.87[0.59]) and GRI and GRI PF (both 2.50), and lowest for BIA-Obesity (1.47[0.74]). Mean metric resolution score ranged from all metrics scoring 1 (ATNI UK) to one of the highest mean scores (SASB, 2.87[0.59]). Several frameworks scored high for verifiability (BIA-Obesity – 2.48[0.71]; WBA- 2.38[0.81]; ATNI UK – 2.35[0.75]; ATNI – 2.34[0.75]), while SASB (1.60[0.71]) and GRI (1.75[0.71]) scored lower for verifiability.

Within each ESG Framework, mean score for each attribute also varied considerably. ATNI, ATNI UK, BIA-Obesity, and WBA showed similar patterns for scoring attributes within each framework. For instance, within each framework, verifiability scored highest (2.34[0.75], 2.35[0.75], 2.48[0.71], and 2.38[0.81], respectively); followed by objectivity, materiality, and activity; and resolution scored lowest (1.14[0.71], 1.00[0.00], 1.23[0.78], and 1.24[0.78] respectively). We also observed similar relative scoring of attributes within GRI and GRI PF frameworks, including metrics scoring highest on average for activity and resolution (all 2.50); but differing widely for materiality (1.00[0.00] for GRI vs. 2.33[0.72] for GRI PF). Within SASB, metrics also scored highest for activity and resolution (both 2.87), and lowest for materiality (1.47[0.86]). Metrics within the PUP had the greatest range across scoring attributes, from 2.83(0.62) for activity to alignment (1.00[0.00]).

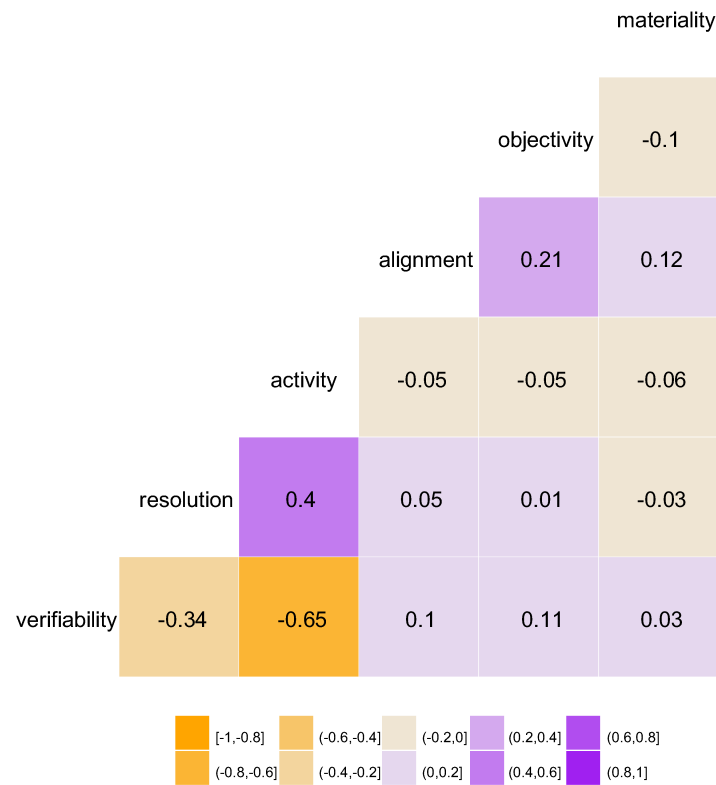

**Figure S1. Intercorrelation of scoring attributes across 529 ESG-Nutrition metrics.** Spearman intercorrelation matrix representing the correlation between each scoring attribute – materiality, objectivity, alignment, activity, resolution, and verifiability— for all extracted ESG-Nutrition metrics. A higher absolute correlation coefficient indicates a strong association, while a lower absolute correlation coefficient indicates the two scoring attributes are measuring independent aspects. See Table 1 for definition and scoring delineation for each scoring attribute. The metric strength assessment was completed in duplicate by two investigators, and any discrepancies in scoring were discussed until consensus was reached.

Table S1. Overview of ESG frameworks, adapted from Robinson *et al.* 2022

| Organization                                                                 | ESG Framework                           | Description                                                                                                                                                                                                                                                                                                                                              | Relevant Sub-Sector                                                                          | Audience                                                              |
|------------------------------------------------------------------------------|-----------------------------------------|----------------------------------------------------------------------------------------------------------------------------------------------------------------------------------------------------------------------------------------------------------------------------------------------------------------------------------------------------------|----------------------------------------------------------------------------------------------|-----------------------------------------------------------------------|
| <b><i>Non-governmental ESG reporting standards</i></b>                       |                                         |                                                                                                                                                                                                                                                                                                                                                          |                                                                                              |                                                                       |
| <b>Global Reporting Initiative[1]</b>                                        | GRI Standards                           | One of the most prominent and commonly used sustainability reporting frameworks, providing standards for companies to report on environmental, social and economic impacts. The GRI Standards include a set of universal standards and topic-specific standards that are selected by the company based on materiality                                    | All                                                                                          | Companies, investors, policymakers, capital markets and civil society |
|                                                                              | G4 Sector Disclosures – Food Processing | The GRI previously developed the G4 Sector Disclosures, which provided sector-specific reporting guidelines. The G4 Sector Disclosures were superseded by the GRI Standards and are not required for preparing a report in accordance with the GRI Standards, however can still be used to provide additional sector-specific guidance                   | Food processing                                                                              |                                                                       |
| <b>Sustainability Accounting Standards Board[2]</b>                          | SASB Standards                          | Provides sustainability accounting standards for companies to disclose financially material environmental, social and governance information to investors. Includes qualitative and quantitative                                                                                                                                                         | Restaurants<br>Processed foods<br>Non-alcoholic beverages<br>Food retailers and distributors | Investors                                                             |
| <b><i>Food sector benchmarking and accountability initiative indices</i></b> |                                         |                                                                                                                                                                                                                                                                                                                                                          |                                                                                              |                                                                       |
| <b>Access to Nutrition Initiative[3]</b>                                     | ATNI Global Index 2022                  | Benchmark of major global food and beverage manufacturers on their nutrition and undernutrition related policies and practices and assesses the healthiness of their product portfolios, published every 2-3 years. Also conducts in-country assessment of food company breast milk substitute and complimentary foods marketing practices and policies. | Food and beverage manufacturers                                                              | Governments, investors, civil society, consumers, and academia        |

|                                                          |                                            |                                                                                                                                                                                                                                                                                                                                                                                                                                         |                                                                                                                                                                     |                                                                |
|----------------------------------------------------------|--------------------------------------------|-----------------------------------------------------------------------------------------------------------------------------------------------------------------------------------------------------------------------------------------------------------------------------------------------------------------------------------------------------------------------------------------------------------------------------------------|---------------------------------------------------------------------------------------------------------------------------------------------------------------------|----------------------------------------------------------------|
| <b>Access to Nutrition Initiative and ShareAction[3]</b> | UK Retail Index 2022                       | Benchmark of ten largest UK food retailers (ALDI UK, Asda, Co-op, Iceland, Lidl, Marks & Spencer, Morrisons, Sainsbury's, Tesco, Waitrose) on their nutrition policies and commitments. Part of ShareAction's (UK-based responsible investment organization) Healthy Market Initiative aimed at leveraging institutional investment to improve obesity and nutrition-related performance of food retailers and manufacturers in the UK. | Food retailers                                                                                                                                                      | Governments, investors, civil society, consumers, and academia |
| <b>World Benchmarking Alliance[4]</b>                    | Global Food and Agriculture Benchmark      | Assess 250 of the world's largest food and agricultural companies on their commitments across 3 key domains of the food system: environment, social inclusion and nutrition.                                                                                                                                                                                                                                                            | Agricultural inputs<br>Agricultural products and commodities<br>Animal proteins<br>Food and beverage manufacturers<br>Food retailers<br>Restaurants<br>Food service |                                                                |
| <b>Food Foundation[5]</b>                                | Plating Up Progress                        | Initiative to assess and measure food industry performance across 10 major topics related to healthy, sustainable and just food systems through assessing the commitments, targets and performance reporting of major UK supermarkets and caterers, quick service and casual dining restaurant chains                                                                                                                                   | Food retailers<br>Contract caterers and food service<br>Casual dining and restaurants<br>Wholesalers                                                                | Investors, businesses and governments                          |
| <b>INFORMAS[6]</b>                                       | Business Impact Assessment (BIA) – Obesity | Initiative that benchmarks the nutrition-related policies, commitments and practices of food and beverage companies, food retailers and quick service restaurants, developed based on ATNI methods and completed in several countries/jurisdictions (Australia, New Zealand, Canada, Malaysia, Belgium and parts of Europe.                                                                                                             | Food retailers<br>Quick service restaurants<br>Food and beverage manufacturers                                                                                      | Governments, academia                                          |

ATNI, Access to Nutrition Initiative; BIA, Business Impact Assessment; ESG, environmental, social and governance; GRI, Global Reporting Initiative; INFORMAS, International Network for Food and Obesity/NCDs Research, Monitoring and Action Support; PUP, Plating UP Progress; SASB, Sustainability Accounting Standards Board; SD, standard deviation; WBA, World Benchmarking Alliance

Table S2. Mean score of 529 ESG-Nutrition metrics,\* grouped by ESG framework

|                                      | ESG Framework† |              |              |              |                     |              |              |              |
|--------------------------------------|----------------|--------------|--------------|--------------|---------------------|--------------|--------------|--------------|
|                                      | ATNI           | ATNI UK      | BIA-Obesity  | GRI          | GRI processed foods | PUP          | SASB         | WBA          |
| <b>N (%)</b>                         | 122 (23.1%)    | 91 (17.2%)   | 189 ( 35.7%) | 4 (0.8%)     | 6 (1.1%)            | 18 (3.4%)    | 15 (2.8%)    | 84 (15.9%)   |
| <b>Metric Attributes, mean (SD)‡</b> |                |              |              |              |                     |              |              |              |
| <b>materiality</b>                   | 2.04 (0.78)    | 1.93 (0.81)  | 1.95 (0.84)  | 1.00 (0.00)  | 2.33 (0.72)         | 2.06 (0.93)  | 1.47 (0.86)  | 2.29 (0.74)  |
| <b>objectivity</b>                   | 2.22 (0.73)    | 1.89 (0.80)  | 2.33 (0.74)  | 2.00 (0.00)  | 1.83 (0.64)         | 1.83 (0.62)  | 2.33 (0.85)  | 1.71 (0.74)  |
| <b>alignment</b>                     | 1.39 (0.84)    | 1.40 (0.84)  | 1.32 (0.81)  | 1.50 (0.76)  | 1.00 (0.00)         | 1.00 (0.00)  | 2.07 (0.94)  | 1.43 (0.77)  |
| <b>activity</b>                      | 1.80 (0.79)    | 1.95 (0.91)  | 1.47 (0.74)  | 2.50 (0.76)  | 2.50 (0.74)         | 2.83 (0.62)  | 2.87 (0.59)  | 2.10 (0.87)  |
| <b>resolution</b>                    | 1.14 (0.71)    | 1.00 (0.00)  | 1.23 (0.78)  | 2.50 (1.00)  | 2.50 (0.74)         | 1.78 (1.00)  | 2.87 (0.59)  | 1.24 (0.78)  |
| <b>verifiability</b>                 | 2.34 (0.75)    | 2.35 (0.75)  | 2.48 (0.71)  | 1.75 (0.71)  | 1.67 (0.72)         | 2.17 (0.62)  | 1.60 (0.71)  | 2.38 (0.81)  |
| <b>total score §</b>                 | 10.94 (1.20)   | 10.52 (1.21) | 10.77 (1.27) | 11.24 (1.44) | 11.83 (0.99)        | 11.67 (1.04) | 13.20 (1.39) | 11.14 (1.20) |

\* Metrics extracted across 4 broad domains: product healthfulness; product distribution and equity; product marketing and labeling; nutrition-related governance. Metrics on topics related to employee health and wellness and workforce nutrition; food loss and food waste; food safety and non-food related health hazards (chemical exposure, etc.) were excluded from this analysis. We also excluded general metrics related to strategy, governance, management, and stakeholder engagement, unless health or nutrition was explicitly mentioned.

† ESG frameworks included non-governmental ESG reporting standards and food sector benchmarking and accountability initiative indices, and were selected for this investigation based on the following criteria: Non-proprietary and publicly accessible; prescribes explicit measurement methods such as material metrics or guiding questions to assist a company's ESG disclosure; includes any mention of nutrition and health within framework; in English and published between 2012 and 2022.

‡ Scoring delineations (1-3) for each scoring attribute provided in Table 1. Scoring was completed by two investigators, and any discordance in scoring was discussed until consensus was reached

§ sum of six scoring attributes, all with equal weight. Theoretical range from 6 to 18.

ATNI, Access to Nutrition Initiative; BIA, Business Impact Assessment; ESG, environmental, social and governance; GRI, Global Reporting Initiative; PUP, Plating UP Progress; SASB, Sustainability Accounting Standards Board; SD, standard deviation; WBA, World Benchmarking Alliance



**Table 3. Attribute scoring and rationale for illustrative\* ESG-Nutrition metrics across four domains**

| Metric†                                                                                                                                                             | Details for Metric Use   Scoring Criteria ‡                                                                                                                                                                                                                                                                                                                                                                                                                                                                                                                                                                                                                                                                                                                                                                                                                                                                                                                                                                                                                         | Framework   | Sub-Sector                    | Scoring Attribute § |             |           |          |            |               | Rationale for Score                                                                                                                                                                                                                                                                                                                                                                                                                                                                                                                                                                                                                                                                                                   |
|---------------------------------------------------------------------------------------------------------------------------------------------------------------------|---------------------------------------------------------------------------------------------------------------------------------------------------------------------------------------------------------------------------------------------------------------------------------------------------------------------------------------------------------------------------------------------------------------------------------------------------------------------------------------------------------------------------------------------------------------------------------------------------------------------------------------------------------------------------------------------------------------------------------------------------------------------------------------------------------------------------------------------------------------------------------------------------------------------------------------------------------------------------------------------------------------------------------------------------------------------|-------------|-------------------------------|---------------------|-------------|-----------|----------|------------|---------------|-----------------------------------------------------------------------------------------------------------------------------------------------------------------------------------------------------------------------------------------------------------------------------------------------------------------------------------------------------------------------------------------------------------------------------------------------------------------------------------------------------------------------------------------------------------------------------------------------------------------------------------------------------------------------------------------------------------------------|
|                                                                                                                                                                     |                                                                                                                                                                                                                                                                                                                                                                                                                                                                                                                                                                                                                                                                                                                                                                                                                                                                                                                                                                                                                                                                     |             |                               | Materiality         | Objectivity | Alignment | Activity | Resolution | Verifiability |                                                                                                                                                                                                                                                                                                                                                                                                                                                                                                                                                                                                                                                                                                                       |
| <b>Product Healthfulness</b>                                                                                                                                        |                                                                                                                                                                                                                                                                                                                                                                                                                                                                                                                                                                                                                                                                                                                                                                                                                                                                                                                                                                                                                                                                     |             |                               |                     |             |           |          |            |               |                                                                                                                                                                                                                                                                                                                                                                                                                                                                                                                                                                                                                                                                                                                       |
| <b>Assessment of the overall healthiness of the product portfolio, measured as the sales-weighted mean HSR score: [value between 0 and 100]</b>                     | <p>Details for Metric Use:</p> <ol style="list-style-type: none"> <li>select company's top five best selling product categories in up to 10 markets</li> <li>mean NPS score for each product category calculated</li> </ol>                                                                                                                                                                                                                                                                                                                                                                                                                                                                                                                                                                                                                                                                                                                                                                                                                                         | ATNI        | manufacturing                 | 3                   | 3           | 3         | 3        | 3          | 1             | Metric measures portfolio healthfulness based on government-endorsed NPS (materiality: 3). Straight-forward, without any subjective decisions required (objectivity: 3). References use of Heath Star Rating for scoring overall healthiness of product portfolio (alignment: 3). Metric about business outputs (activity: 3), quantitative (resolution). Challenging to collect data for HSR scoring for products in portfolio, likely not publicly or privately available (verifiability: 1).                                                                                                                                                                                                                       |
| <b>Company has a target for, and reports on, a percentage shift in protein procurement or sales that comes from animal vs plant-based protein sources</b>           | <p>Details for Metric Use:</p> <p>There is currently no clear consensus on the definition to be used for animal-based vs. plant-based protein sources. The maximum score can be applied for a target and performance data as long as the methodology is provided by the company and both animal-based and plant-based data is included. Partial data (for example data that only refers to plant-based sales) achieve a score of 2. Less specific data around increasing the product range or introducing new plant-based products achieve a score of 1.</p> <p><b>Scoring guidelines for quantitative metrics with specific targets:</b></p> <ol style="list-style-type: none"> <li>3: Company has a clear target and is reporting against the target</li> <li>2: Company reports performance data but not a target, or has a target but is not reporting against the target</li> <li>1: Company recognizes the issue and has taken limited or isolated action</li> <li>0: No evidence is found that a company recognizes the issue or is taking action</li> </ol> | PUP         | catering, restaurants, retail | 1                   | 2           | 1         | 3        | 1          | 2             | Metric has limited materiality in assessing overall product healthfulness -- animal products can be healthy, plant-based can be unhealthy, and vice-versa. In addition, procurement doesn't necessarily translate to catering service and what is consumed (materiality: 1). Requires subjective decisions on what products falls into the plant vs. animal source (objectivity: 2). ). No reference to standards or frameworks for relevant targets (alignment: 1). Metric of targets and associated procurement/sales (measure: 2), Requires quantitative data, but metric given full points if any data is provided (resolution: 3). Targets are publicly available, but not procurement/sales (verifiability: 2). |
| <b>Does the restaurant have commitments or taken substantive action to improving the healthiness of oils used in frying foods/frying practices? (if applicable)</b> | <p><b>Scoring Criteria:</b></p> <ol style="list-style-type: none"> <li>5: Does not fry foods, or commits to using non-hydrogenated vegetable oils</li> <li>0: No commitments / no information available to the research team</li> </ol>                                                                                                                                                                                                                                                                                                                                                                                                                                                                                                                                                                                                                                                                                                                                                                                                                             | BIA-Obesity | restaurants                   | 1                   | 2           | 1         | 1        | 1          | 3             | Metric has limited materiality in assessing overall product or service portfolio healthfulness -- frying and use of hydrogenated oils is a narrow aspect of product healthfulness (materiality: 1). Fairly objective metric, doesn't require subjective decisions or assumptions, except for what is classified as non-hydrogenated vegetable oils (objectivity: 2). No reference to standards or frameworks (alignment: 1). Metric around business commitments (activity: 1), categorical (resolution: 1). Commitment data generally accessible from publicly available sources (verifiability: 3).                                                                                                                  |

| Metric†                                                                                                                                                                                                                                                                                                                | Details for Metric Use   Scoring Criteria‡                                                                                                                                                                                                                                                                                                                                                                                                                                                                                                                                                                                                                                                                                                                                                                                                                                                                     | Framework   | Sector                                       | Materiality | Objectivity | Alignment | Activity | Resolution | Verifiability | Rationale for Score                                                                                                                                                                                                                                                                                                                                                                                                                                                                                                                                                                                                                                 |
|------------------------------------------------------------------------------------------------------------------------------------------------------------------------------------------------------------------------------------------------------------------------------------------------------------------------|----------------------------------------------------------------------------------------------------------------------------------------------------------------------------------------------------------------------------------------------------------------------------------------------------------------------------------------------------------------------------------------------------------------------------------------------------------------------------------------------------------------------------------------------------------------------------------------------------------------------------------------------------------------------------------------------------------------------------------------------------------------------------------------------------------------------------------------------------------------------------------------------------------------|-------------|----------------------------------------------|-------------|-------------|-----------|----------|------------|---------------|-----------------------------------------------------------------------------------------------------------------------------------------------------------------------------------------------------------------------------------------------------------------------------------------------------------------------------------------------------------------------------------------------------------------------------------------------------------------------------------------------------------------------------------------------------------------------------------------------------------------------------------------------------|
| <b>Product Distribution and Equity</b>                                                                                                                                                                                                                                                                                 |                                                                                                                                                                                                                                                                                                                                                                                                                                                                                                                                                                                                                                                                                                                                                                                                                                                                                                                |             |                                              |             |             |           |          |            |               |                                                                                                                                                                                                                                                                                                                                                                                                                                                                                                                                                                                                                                                     |
| <b>Does the company's policy position support WHO's position on fiscal policies to make healthier foods relatively cheaper and unhealthy foods relatively more expensive, as articulated in the WHO Global Action Plan for NCDs and the Report of the Commission on Ending Childhood Obesity, Recommendation 1.2)?</b> | <p><b>Details for Metric Use:</b><br/>ECHO Statement on Recommendation 1.2: Implement an effective tax on sugar-sweetened beverages.<br/>Global Action Plan: consider economic tools that are justified by evidence, and may include taxes and subsidies, that create incentives for behaviours associated with improved health outcomes, improve the affordability and encourage consumption of healthier food products and discourage the consumption of less healthy options.<br/><b>Scoring criteria:</b><br/>10: Strong support (e.g., includes support for taxes on unhealthy foods, broadly defined, as well as subsidies for healthy foods)<br/>5: Weak support (e.g., includes support for taxes on unhealthy foods, narrowly defined, or subsidies for healthy foods)<br/>0: No details available<br/>-10: Strongly opposed (e.g., opposes soft drinks tax or unhealthy foods tax OR both taxes)</p> | BIA-Obesity | manufacturing, restaurants, retail           | 3           | 2           | 3         | 1        | 1          | 3             | Strong materiality for distribution and equity - incentivizing consumption of healthier foods, and disincentivizing unhealthy foods (materiality: 3). Provides specific references for defining what relatively cheaper and more expensive means, but unclear what constitutes healthy vs. unhealthy foods (objectivity: 2). References WHO Global Plan for NCDs and ECHO Statement Recommendation 1.2 (alignment: 3). Measure of company's policies/commitments (activity: 1), categorical (resolution: 1). Company's policies should be publicly available and relatively easy to access (verifiability: 3).                                      |
| <b>Is there evidence that the company has done the following [price related interventions] on fruit and veg?</b>                                                                                                                                                                                                       | <p><b>Scoring Criteria:</b><br/>Discounting 'wonky' or near expired fruit or vegetables<br/>Free fruit or vegetables for children in-store<br/>Fun packaged fruit, veg or wholegrains for children<br/>More fruit, veg and wholegrains in meal deals<br/>Minimum number of fruit and veg and wholegrains promotions<br/>Other<br/>None/no information found<br/><i>Tick all options that apply with a maximum of 20 points being possible to achieve</i></p>                                                                                                                                                                                                                                                                                                                                                                                                                                                   | ATNI UK     | retail                                       | 2           | 2           | 1         | 3        | 1          | 2             | Metric has limited materiality as only focused on fruit, vegetables and whole grains, rather than overall product healthfulness, but assess a range of relevant retail price-based interventions (materiality: 2). Subjective decisions on what is classified as fruit, vegetables and whole grains, what constitutes increase/reduced promotions, and the level of evidence required (objectivity: 2). No reference to relevant frameworks, standards or codes (alignment: 1). Measure of company's performance (activity: 3), categorical (resolution: 1). Evidence of company's interventions should be available internally (verifiability: 2). |
| <b>The company has a target to improve the accessibility of nutritious foods, especially for vulnerable groups, through its commercial activities and reports progress against this target.</b>                                                                                                                        | <p><b>Details for Metric Use:</b><br/>Vulnerable groups include vulnerable and marginalised populations across countries as well as within countries and markets. Vulnerability to a higher risk of malnutrition (undernutrition, nutrient deficiencies and overweight, obesity and diet-related diseases) compared to the general population can vary by geography, income or other socio-economic factors as well as by age and life stage. Depending on the form of malnutrition, vulnerable groups can include infants, children, women of reproductive age, the elderly and/or low-income or marginalised households</p>                                                                                                                                                                                                                                                                                  | WBA         | catering, manufacturing, restaurants, retail | 2           | 1           | 1         | 2        | 1          | 3             | Metric has limited materiality - focused on vulnerable population, as perceived by company, (materiality: 2). Metric requires subjective decisions on the definition of "commercial activities", "affordability", "nutritious food", and requires the company to decide what the target vulnerable population (objectivity: 1). No reference to relevant frameworks, standards or codes (alignment: 1). Measure of company's target (activity: 2), categorical (resolution: 1). Company commitments and targets are likely relatively easy to access in annual reports or online (verifiability: 3).                                                |

| Metric†                                                                                                                                                                                                                                                                                  | Details for Metric Use   Scoring Criteria‡                                                                                                                                                                                                                                                                                                                                                                                                                                                                                                                                                                                                                                                       | Framework   | Sector        | Materiality | Objectivity | Alignment | Activity | Resolution | Verifiability | Rationale for Score                                                                                                                                                                                                                                                                                                                                                                                                                                                                                                                                                                                                                   |
|------------------------------------------------------------------------------------------------------------------------------------------------------------------------------------------------------------------------------------------------------------------------------------------|--------------------------------------------------------------------------------------------------------------------------------------------------------------------------------------------------------------------------------------------------------------------------------------------------------------------------------------------------------------------------------------------------------------------------------------------------------------------------------------------------------------------------------------------------------------------------------------------------------------------------------------------------------------------------------------------------|-------------|---------------|-------------|-------------|-----------|----------|------------|---------------|---------------------------------------------------------------------------------------------------------------------------------------------------------------------------------------------------------------------------------------------------------------------------------------------------------------------------------------------------------------------------------------------------------------------------------------------------------------------------------------------------------------------------------------------------------------------------------------------------------------------------------------|
| <b>Product Marketing and Labeling</b>                                                                                                                                                                                                                                                    |                                                                                                                                                                                                                                                                                                                                                                                                                                                                                                                                                                                                                                                                                                  |             |               |             |             |           |          |            |               |                                                                                                                                                                                                                                                                                                                                                                                                                                                                                                                                                                                                                                       |
| <b>Does the company provide nutrition information online for own brand products?</b>                                                                                                                                                                                                     | <p><b>Scoring Criteria:</b></p> <p>10: Yes, comprehensive nutrition information (calories, sodium, saturated fat, total fat, sugar) for most (&gt;80%) products, including on a per 100g/100ml basis</p> <p>7.5: Yes, comprehensive nutrition information (calories, sodium, saturated fat, total fat, sugar) for most (&gt;80%) products, OR comprehensive nutrition information for all products per serving only</p> <p>5: Comprehensive nutrition information for some (&gt;50%) products</p> <p>2.5: Limited nutrition information (i.e. does not include calories, sodium, saturated fat, total fat or sugar) for some (&gt;50%) items</p> <p>0: &lt;50% of products or no information</p> | BIA-Obesity | retail        | 3           | 3           | 1         | 3        | 3          | 3             | Assesses coverage and quality of voluntary product labeling, not just legal requirements (materiality: 3). Caveat: nutrition information included is not comprehensive or aligned with latest scientific evidence. Straight-forward, without any subjective decisions required (objectivity: 3). No references to existing codes/standards (alignment: 1). Measures product labeling performance (activity: 3), quantitative (resolution: 3). Publicly available online (verifiability: 3).                                                                                                                                           |
| <b>Does the company commit to go beyond the Code of Non-broadcast Advertising and Direct &amp; Promotional Marketing (CAP Code) in terms of the use of fantasy/cartoon/character in its marketing to children in relation to products classified as high in fat, salt and/or sugars?</b> | <p><b>Categorical Options (Tick All that Apply):</b></p> <p>Not to use fantasy/ cartoon/ character/ celebrity on any products on any forms of media (including on pack, in store and online)</p> <p>Not to use fantasy/ cartoon/ character/ celebrity for some products only. And/or in some forms of media only</p> <p>No/no information found</p> <p>For more details, please refer to the UK Code of Non-broadcast Advertising and Direct &amp; Promotional Marketing (CAP Code).</p>                                                                                                                                                                                                         | ATNI UK     | retail        | 1           | 3           | 3         | 1        | 1          | 3             | Metric has limited materiality as focused only on children, focuses on a narrow definition of health (fat, salt, sugar content), and one narrow aspect of marketing (use of fantasy/cartoons/characters), rather than responsible marketing policy overall (materiality: 1). Objective metric, without assumptions required except for what constitutes high in fat, salt and/or sugars (objectivity: 3). Explicit reference to existing codes/standards (alignment: 3). Measures business commitments (activity: 1), categorical (resolution:1). Companies will publish commitments in annual reports, or online (verifiability: 3). |
| <b>Concerning the form and digital medium of advertisement in schools, does the company: (Tick all that apply)</b>                                                                                                                                                                       | <p><b>Categorical Options:</b></p> <p>Extend its commitment explicitly to new media marketing/advertising techniques in or related to schools</p> <p>Include offering 'educational materials' only when in agreement with schools/parents in its commitment</p> <p><b>Details for Metric Use:</b></p> <p>this indicator applies to commitments linked to primary and/or secondary schools</p>                                                                                                                                                                                                                                                                                                    | ATNI        | manufacturing | 1           | 2           | 1         | 1        | 1          | 3             | Metric is limited to advertising in schools (only primary and secondary school children), and no reference to content of marketing or extent to which it is focused on healthfulness of foods (materiality: 1). Somewhat objective metric, except for what constitutes "educational materials" and "agreement with schools/parents" (objectivity: 3). No alignment with relevant frameworks, standards or codes (alignment: 1). Measures business commitments (activity: 1), categorical (resolution: 1). Companies will publish commitments in annual reports, or online (verifiability: 3).                                         |

| Metric†                                                                                                                                                                                                                                                                                 | Details for Metric Use   Scoring Criteria‡                                                                                                                                                                                                                                                                                                                                                                                                                                                                                                           | Framework   | Sector                             | Materiality | Objectivity | Alignment | Activity | Resolution | Verifiability | Rationale for Score                                                                                                                                                                                                                                                                                                                                                                                                                                                                                                                                                                                                                                                                                                                                                                     |
|-----------------------------------------------------------------------------------------------------------------------------------------------------------------------------------------------------------------------------------------------------------------------------------------|------------------------------------------------------------------------------------------------------------------------------------------------------------------------------------------------------------------------------------------------------------------------------------------------------------------------------------------------------------------------------------------------------------------------------------------------------------------------------------------------------------------------------------------------------|-------------|------------------------------------|-------------|-------------|-----------|----------|------------|---------------|-----------------------------------------------------------------------------------------------------------------------------------------------------------------------------------------------------------------------------------------------------------------------------------------------------------------------------------------------------------------------------------------------------------------------------------------------------------------------------------------------------------------------------------------------------------------------------------------------------------------------------------------------------------------------------------------------------------------------------------------------------------------------------------------|
| <b>Nutrition-Related Governance</b>                                                                                                                                                                                                                                                     |                                                                                                                                                                                                                                                                                                                                                                                                                                                                                                                                                      |             |                                    |             |             |           |          |            |               |                                                                                                                                                                                                                                                                                                                                                                                                                                                                                                                                                                                                                                                                                                                                                                                         |
| <b>Who has formal accountability for implementing the company's nutrition strategy and/or program?</b>                                                                                                                                                                                  | <p><b>Categorical options:</b><br/> CEO or other senior Executive<br/> Committee that reports to the Board or an Executive Manager<br/> Senior manager one level below Executive<br/> Another less senior staff member<br/> No oversight assigned<br/> No information</p> <p><b>Details for Metric Use:</b><br/> Note that the accountable person is the individual who is ultimately answerable for the activity or decision. This includes "yes" or "no" authority and veto power. Only one accountable person can be assigned to an action. "</p> | ATNI        | manufacturing                      | 3           | 3           | 1         | 2        | 1          | 2             | Captures a priority topic for investors related to a company's nutrition-related governance (materiality: 3), objective question (objectivity: 3). No reference to relevant frameworks, codes, or standards (alignment: 1). Measures company's processes (activity: 2), categorical (resolution: 1). Data on accountability may only be available internally (verifiability: 2).                                                                                                                                                                                                                                                                                                                                                                                                        |
| <b>Does the company publish details of its political donations? (when not prohibited by government policy)</b>                                                                                                                                                                          | <p><b>Scoring Criteria:</b><br/> 10: Yes, information on national-level activity is publicly available (on a company website or document) OR declaration of no activity in this area<br/> 0: No</p>                                                                                                                                                                                                                                                                                                                                                  | BIA-Obesity | manufacturing, restaurants, retail | 2           | 3           | 1         | 2        | 1          | 3             | Metric assesses company's disclosures of political donations, not the nature of what is being funded, and its impacts on human health. However, political donations are considered a priority topic for investors in capturing nutrition-related governance (materiality: 2) Objective measure (objectivity: 3), but without reference to relevant frameworks, standards or codes (verifiability: 2). Measure company's processes/operations (activity: 2), Categorical(resolution:1). If published, data should be accessible (verifiability: 3).                                                                                                                                                                                                                                      |
| <b>For nutrition education/nutrition literacy/healthy diet-oriented/active lifestyle programs that aim to reach priority populations, does the company support or fund programs that are adapted to the specific needs, background and level of nutrition literacy of these groups?</b> | <p><b>Categorical options:</b><br/> Yes, and these adapted programs have been designed by and/or (co)implemented with groups with relevant expertise and strong leadership in the process<br/> Yes, and some of these adapted programs have been designed by and/or (co)implemented with groups with relevant expertise and strong leadership in the process<br/> Company only offers own programs<br/> No information<br/> Not applicable (i.e. this indicator is not relevant as no priority populations are reached)</p>                          | ATNI        | manufacturing                      | 2           | 2           | 1         | 2        | 1          | 2             | Limited materiality - non-commercial, community engagement programming is considered less of a priority for governance than other topics. In addition, filling nutrition needs of a company-defined priority population raises concerns about bias (materiality: 2). Requires subjective decisions to differentiate between options for how programs are designed, what "relevant expertise", "co-implementation" and "strong leadership" entails, as well as who priority populations are (objectivity: 2), and no reference to relevant frameworks, standards or codes (alignment: 1). Measures company's processes related to community engagement (activity: 2), categorical (resolution: 1). Information on such processes is likely only internally available (verifiability: 2). |

\*metrics selected to illustrate the range of potential metrics and associated scores within each domain. Remainder of metrics and associated scoring provided in Table S2.

†Metrics extracted from 8 ESG frameworks across four broad domains: product portfolio healthfulness, production distribution and equity, marketing and labeling, and nutrition-related governance. Metrics on topics related to employee health and wellness and workforce nutrition; food loss and food waste; food safety and non-food related health hazards (chemical exposure, etc.) were excluded from this analysis. We also excluded general metrics related to strategy, governance, management, and stakeholder engagement, unless health or nutrition was explicitly mentioned.

‡ When available, details for metric use and scoring criteria for each metric were also extracted from each framework. This included definitions of specific terms used in the metric, details of guidelines or codes, categorical options, and/or scoring criteria for that metric. For some frameworks and metrics, no additional guidance or scoring criteria were provided.

§ Scoring delineations (1-3) for each scoring attribute provided in Table 1. Scoring was completed in duplicate by investigators, and any discordance in scoring was discussed until consensus was reached.

ATNI, Access to Nutrition Initiative; BIA-Obesity, Business Impact Assessment Obesity; CAP code, UK Code of Non-broadcast Advertising, Sales Promotion and Direct Marketing; CEO, chief executive officer; ECHO, Early Childhood Obesity Prevention Program; ESG, environmental, social and governance; HSR, Health Star Rating; NCD, noncommunicable disease; NPS, nutrient profiling system; PUP, Plating UP Progress; WBA, World Benchmarking Alliance, WHO, World Health Organization

Table S4. Scoring results for 401 unique ESG-Nutrition metrics

| metric ID                    | Metric                                                                                                                                                                                         | Details for Metric use   Scoring Criteria                                                                                                                                                                                                                                                                                                                                                                                                                                                                                                                                                                                                                                                                                                                                                                                                                                                                                                                                                        | Framework | Materiality | Objectivity | Alignment | Activity | Resolution | Verifiability |
|------------------------------|------------------------------------------------------------------------------------------------------------------------------------------------------------------------------------------------|--------------------------------------------------------------------------------------------------------------------------------------------------------------------------------------------------------------------------------------------------------------------------------------------------------------------------------------------------------------------------------------------------------------------------------------------------------------------------------------------------------------------------------------------------------------------------------------------------------------------------------------------------------------------------------------------------------------------------------------------------------------------------------------------------------------------------------------------------------------------------------------------------------------------------------------------------------------------------------------------------|-----------|-------------|-------------|-----------|----------|------------|---------------|
| <b>Product Healthfulness</b> |                                                                                                                                                                                                |                                                                                                                                                                                                                                                                                                                                                                                                                                                                                                                                                                                                                                                                                                                                                                                                                                                                                                                                                                                                  |           |             |             |           |          |            |               |
| 1                            | Assessment of the overall healthiness of the product portfolio, measured as the sales-weighted mean HSR score: [value between 0 and 100]                                                       | 1. select company's top five best selling product categories in up to 10 markets<br>2. mean NPS score for each product category calculated<br>HSR = Health Star Rating                                                                                                                                                                                                                                                                                                                                                                                                                                                                                                                                                                                                                                                                                                                                                                                                                           | ATNI      | 3           | 3           | 3         | 3        | 3          | 1             |
| 2                            | Assessment of the change in product portfolio healthiness compared with the 2018 Product Profile: [value between 0 and 100]                                                                    | based on Health Star Rating                                                                                                                                                                                                                                                                                                                                                                                                                                                                                                                                                                                                                                                                                                                                                                                                                                                                                                                                                                      | ATNI      | 3           | 3           | 3         | 3        | 3          | 1             |
| 3                            | Assessment of the companies' performance within product categories, relative to competition, measured as the mean within-product category score: [value between 0 and 100]                     | relative to competition. Measured as mean within-product category score for sales-weighted Health Star Rating (0-100)                                                                                                                                                                                                                                                                                                                                                                                                                                                                                                                                                                                                                                                                                                                                                                                                                                                                            | ATNI      | 2           | 2           | 3         | 3        | 3          | 1             |
| 4                            | Has the company set a target to reduce levels or achieve lower stated levels of salt/sodium and, if so, in how many products or categories? Check all that apply for baseline and target Year. | The company has set a target to reduce levels of salt/sodium in all relevant products/categories<br>The company has set a target to reduce levels of salt/sodium in some relevant products/categories<br>No salt reduction target<br>No information<br>Not applicable (explain)<br><br>The company has defined a specific and measurable (quantifiable) target<br>The target encompasses either objective nutrition criteria or limits (sets limits per g/ml/kcal or specifies a (mean) target value), or relative reduction criteria with full specification of the baseline value<br>The target is time-bound<br>The target is externally verifiable (does not rely on company-internal definitions or information for verification)<br><br>The WHO Member States in WHA 66.10 have agreed on a voluntary global NCD target for a 30% relative reduction in mean population intake of salt, with the aim of achieving a target of less than 5 grams per day (approximately 2g sodium) by 2025. | ATNI      | 2           | 2           | 2         | 2        | 1          | 2             |
| 5                            | Has the company set a target to eliminate or reduce industrially-produced trans fat in accordance with WHO guidance? Check all that apply for baseline and target Year.                        | Target aligns with WHO recommendation to eliminate industrially-produced trans fat in all relevant products/categories<br>Target aligns with WHO recommendation to eliminate industrially-produced trans fat in some relevant products/categories<br>Target does not align with WHO recommendation<br>No trans fat reduction target<br>No information<br>Not applicable (explain)<br><br>The company has defined a specific and measurable (quantifiable) target<br>The target encompasses objective criteria or limits based on percentage of energy or weight<br>The target is time-bound                                                                                                                                                                                                                                                                                                                                                                                                      | ATNI      | 2           | 3           | 3         | 2        | 1          | 2             |

| metric ID | Metric                                                                                                                                                                                                                                                                                                      | Details for Metric use   Scoring Criteria                                                                                                                                                                                                                                                                                                                                                                                                                                                                                                                                                                                                                                                                                                                                                                                                                                                                                                                                                                                                                                                                                  | Framework | Materiality | Objectivity | Alignment | Activity | Resolution | Verifiability |
|-----------|-------------------------------------------------------------------------------------------------------------------------------------------------------------------------------------------------------------------------------------------------------------------------------------------------------------|----------------------------------------------------------------------------------------------------------------------------------------------------------------------------------------------------------------------------------------------------------------------------------------------------------------------------------------------------------------------------------------------------------------------------------------------------------------------------------------------------------------------------------------------------------------------------------------------------------------------------------------------------------------------------------------------------------------------------------------------------------------------------------------------------------------------------------------------------------------------------------------------------------------------------------------------------------------------------------------------------------------------------------------------------------------------------------------------------------------------------|-----------|-------------|-------------|-----------|----------|------------|---------------|
|           |                                                                                                                                                                                                                                                                                                             | The target is externally verifiable (does not rely on company-internal definitions or information for verification)<br><br>WHO recommends that the amount of industrial trans fat (iTFA) in products does not exceed 2 g of iTFA per 100 g fat/oil globally by 2023                                                                                                                                                                                                                                                                                                                                                                                                                                                                                                                                                                                                                                                                                                                                                                                                                                                        |           |             |             |           |          |            |               |
| 6         | Has the company set a target to reduce levels or achieve lower stated levels of saturated fats and, if so, in how many products or categories? Check all that apply for baseline and target Year.                                                                                                           | The company has set a target to reduce/reach lower levels of saturated fats for all relevant products/sub-categories<br>The company has set a target to reduce/reach lower levels of saturated fats for some relevant products/sub-categories<br>No saturated fat reduction target<br>No information<br>Not applicable (explain)<br><br>The company has defined a specific and measurable (quantifiable) target<br>The target encompasses either objective nutrition criteria or limits (sets limits per g/ml/kcal or specifies a (mean) target value), or relative reduction criteria with full specification of the baseline value<br>The target is time-bound<br>The target is externally verifiable (does not rely on company-internal definitions or information for verification)                                                                                                                                                                                                                                                                                                                                    | ATNI      | 2           | 2           | 1         | 2        | 1          | 2             |
| 7         | Did the company set an added sugar target/threshold or a calorie reduction target/threshold?<br><br>Has the company set a target to reduce levels or achieve lower stated levels of added sugars/calories and, if so, in how many products / categories? Check all that apply for baseline and target Year. | Added sugar<br>Calorie<br>Not applicable<br><br>The company has set a target to reduce levels of added sugars/calories for all relevant products/categories<br>The company has set a target for levels of added sugars/calories for some relevant products/categories<br>No sugar reduction/calorie reduction target<br>No information<br>Not applicable (explain)<br><br>The company has defined a specific and measurable (quantifiable) target<br>The target encompasses either objective nutrition criteria or limits (sets limits per g/ml/kcal or specifies a (mean) target value), or relative reduction criteria with full specification of the baseline value<br>The target is time-bound<br>The target is externally verifiable (does not rely on company-internal definitions or information for verification)<br><br>Depending on the product portfolio, it may be relevant for the company to define either an added sugar reduction target, or a calorie reduction target. Both types of reduction targets are scored equally, and only one type of target is sufficient for a full score on this indicator. | ATNI      | 2           | 2           | 1         | 2        | 1          | 2             |
| 8         | Has the company set a target to increase levels or achieve higher stated levels of fruits, vegetables, nuts, and legumes and, of so, in how many products or categories? Check all that apply for baseline and target Year.                                                                                 | In scope are fruits, vegetables, nuts and legumes in alignment with the WHO Healthy Diet fact sheet 394. This excludes starchy roots such as potato, sweet potato and cassava. Furthermore, constituents, isolates or extracts of a food are excluded.<br><br>The company has set a target to increase levels of FVNL in all relevant products/categories<br>The company has set a target to increase levels of FVNL in some relevant products/categories                                                                                                                                                                                                                                                                                                                                                                                                                                                                                                                                                                                                                                                                  | ATNI      | 2           | 2           | 2         | 2        | 1          | 2             |

| metric ID | Metric                                                                                                                                                                                                                                                                                   | Details for Metric use   Scoring Criteria                                                                                                                                                                                                                                                                                                                                                                                                                                                                                                                                                                                                                                                                                                                                      | Framework | Materiality | Objectivity | Alignment | Activity | Resolution | Verifiability |
|-----------|------------------------------------------------------------------------------------------------------------------------------------------------------------------------------------------------------------------------------------------------------------------------------------------|--------------------------------------------------------------------------------------------------------------------------------------------------------------------------------------------------------------------------------------------------------------------------------------------------------------------------------------------------------------------------------------------------------------------------------------------------------------------------------------------------------------------------------------------------------------------------------------------------------------------------------------------------------------------------------------------------------------------------------------------------------------------------------|-----------|-------------|-------------|-----------|----------|------------|---------------|
|           |                                                                                                                                                                                                                                                                                          | <p>No FVNL increase target<br/>No information<br/>Not applicable (explain)</p> <p>The company has defined a specific and measurable (quantifiable) target<br/>The target encompasses either objective nutrition criteria or goals (sets goals per g/ml/kcal or specifies a (mean) target value), or relative criteria to increase FVNL with full specification of the baseline value<br/>The target is time-bound<br/>The target is externally verifiable (does not rely on company-internal definitions or information for verification)</p>                                                                                                                                                                                                                                  |           |             |             |           |          |            |               |
| 9         | Has the company set a target to increase levels or achieve higher stated levels of whole grains and, if so, in how many products or categories? Check all that apply for baseline and target Year.                                                                                       | <p>The company has set a target to increase levels of whole grains in all relevant products/categories<br/>The company has set a target to increase levels of whole grains in some relevant products/categories<br/>No whole grains increase target<br/>No information<br/>Not applicable (explain)</p> <p>The company has defined a specific and measurable (quantifiable) target<br/>The target encompasses either objective nutrition criteria or goals (sets goals per g/ml/kcal or specifies a (mean) target value), or relative criteria to increase whole grains with full specification of the baseline value<br/>The target is time-bound<br/>The target is externally verifiable (does not rely on company-internal definitions or information for verification)</p> | ATNI      | 2           | 2           | 1         | 2        | 1          | 2             |
| 10        | In the last 3 years, has the company invested in or developed products with smaller packaging sizes or serving sizes, aimed to improve consumer portion control?                                                                                                                         | <p>Yes, across multiple products or product categories<br/>Yes, limited to one type of product or product category<br/>No<br/>No information<br/>Not applicable</p>                                                                                                                                                                                                                                                                                                                                                                                                                                                                                                                                                                                                            | ATNI      | 1           | 2           | 1         | 3        | 1          | 3             |
| 11        | Does the company have a Nutrient Profiling System (NPS), or multiple? (For information only, i.e. not scored) if Yes:<br>Part2: Is an NPS used to guide new product development/(re)formulation?<br>Part3: Is the same NPS used to determine which products can be marketed to children? | <p>Yes, No, No information<br/>for Part 3: Yes, No, No - another system used for that purpose, No information</p>                                                                                                                                                                                                                                                                                                                                                                                                                                                                                                                                                                                                                                                              | ATNI      | 2           | 2           | 1         | 2        | 1          | 2             |
| 12        | Is the company's definition of healthy products linked to the NPS used?                                                                                                                                                                                                                  | <p>Yes, explicitly based on objective nutrition criteria, covering all products<br/>Yes, but not all nutrition criteria are clearly defined or not all products are covered<br/>No<br/>No information</p> <p>All products covered in the scope of the Corporate Profile are considered here. This excludes specialty products such as BMS products, medical nutrition, weight-loss products, etc.</p>                                                                                                                                                                                                                                                                                                                                                                          | ATNI      | 2           | 1           | 1         | 2        | 1          | 2             |



| metric ID | Metric                                                                                                                                                                         | Details for Metric use   Scoring Criteria                                                                                                                                                                                                                                                                                                                                                                                                                                                                                                                                                                                                                                                                                                                                                                                                                                                                                                                                                                                                                                                                                                                                                                                                                                                                                                                                                                                                                                                                                                                                                                                                                                                                                                                                                                                                                                                                                                                                      | Framework | Materiality | Objectivity | Alignment | Activity | Resolution | Verifiability |
|-----------|--------------------------------------------------------------------------------------------------------------------------------------------------------------------------------|--------------------------------------------------------------------------------------------------------------------------------------------------------------------------------------------------------------------------------------------------------------------------------------------------------------------------------------------------------------------------------------------------------------------------------------------------------------------------------------------------------------------------------------------------------------------------------------------------------------------------------------------------------------------------------------------------------------------------------------------------------------------------------------------------------------------------------------------------------------------------------------------------------------------------------------------------------------------------------------------------------------------------------------------------------------------------------------------------------------------------------------------------------------------------------------------------------------------------------------------------------------------------------------------------------------------------------------------------------------------------------------------------------------------------------------------------------------------------------------------------------------------------------------------------------------------------------------------------------------------------------------------------------------------------------------------------------------------------------------------------------------------------------------------------------------------------------------------------------------------------------------------------------------------------------------------------------------------------------|-----------|-------------|-------------|-----------|----------|------------|---------------|
| 13        | In respect of the NPS that the company uses to guide new product development or (re)formulation, what type of system is used?                                                  | A formal internal NPS that calculates overall nutritional quality scores for each product, or defines extensive product category-specific nutrition criteria<br>A pre-cursor to a full NPS, e.g. a tool to assess levels of salt, fat, sugar etc. and rates them high, medium, or low, or above or below a threshold, but which does not calculate overall nutritional quality<br>No system is in place<br>No information                                                                                                                                                                                                                                                                                                                                                                                                                                                                                                                                                                                                                                                                                                                                                                                                                                                                                                                                                                                                                                                                                                                                                                                                                                                                                                                                                                                                                                                                                                                                                      | ATNI      | 2           | 2           | 1         | 2        | 1          | 2             |
| 14        | Does the company provide evidence that its definition of healthy products or products that meet its nutrition criteria, aligns with external benchmarks? (tick all that apply) | Its definition of healthy products corresponds with the HSR* $\geq 3.5$ definition of healthy (smaller than 10% deviation in estimated percentage of healthy products)<br>Its definition of healthy products is benchmarked by the company to external standards but the deviation with HSR* $\geq 3.5$ criterion is larger than 10%<br>Its definition of healthy products is NOT benchmarked to external standards<br>For Products marketed to children, its nutrition criteria correspond with regional WHO criteria for marketing to children or the percentage deviation of products meeting the both criteria is smaller than 10%<br>For Products marketed to children, its nutrition criteria do NOT correspond with regional WHO criteria for marketing to children or the percentage deviation of products meeting the both criteria exceeds 10%<br>No information<br><br>*Benchmarking against the Nutri-Score NPS, considering all A and B products as healthy, is considered equivalent. For benchmarking against other government-endorsed systems the answer option 'Its definition of healthy products is benchmarked by the company to external standards but the deviation with HSR* $\geq 3.5$ criterion is larger than 10%' will be selected if a healthy threshold (equivalent) cannot be determined.<br><br>Regional Nutrient Profile Models to implement recommendations on the marketing of foods and non-alcoholic beverages to children have been defined by the World Health Organization for all regions (except for Africa)<br><br>For this indicator, only two answer options can be selected – one of the first three options and one of the remaining two options. In case companies commit to not market any products to children, the relevant answer option is 'its nutrition criteria correspond with regional WHO criteria for marketing to children or the percentage deviation of products meeting the both criteria is smaller than 10%' | ATNI      | 3           | 3           | 3         | 2        | 1          | 3             |
| 15        | Which products and categories are covered by the company's NPS?                                                                                                                | All products and product categories<br>Some products and product categories<br>No products and categories (no NPS)<br>No information                                                                                                                                                                                                                                                                                                                                                                                                                                                                                                                                                                                                                                                                                                                                                                                                                                                                                                                                                                                                                                                                                                                                                                                                                                                                                                                                                                                                                                                                                                                                                                                                                                                                                                                                                                                                                                           | ATNI      | 2           | 2           | 1         | 2        | 1          | 2             |
| 16        | What types of food components does the company's NPS assess?                                                                                                                   | Both positive and negative food components<br>Negative food components only<br>None (no NPS)<br>No information<br>Not applicable. Note: If a company explicitly applies the WHO regional models or other government-endorsed models as its NPS and which does not include positive food components, 'not applicable' should be selected, to avoid a sub-optimal assessment. Please note that for a company's own NPS, which may be based on WHO or other guidelines, this does not apply.                                                                                                                                                                                                                                                                                                                                                                                                                                                                                                                                                                                                                                                                                                                                                                                                                                                                                                                                                                                                                                                                                                                                                                                                                                                                                                                                                                                                                                                                                      | ATNI      | 2           | 2           | 1         | 2        | 1          | 2             |

| metric ID | Metric                                                                                                                                                                                                                                         | Details for Metric use   Scoring Criteria                                                                                                                                                                                                                                                                                                                                                                                                                                                                                                                                            | Framework | Materiality | Objectivity | Alignment | Activity | Resolution | Verifiability |
|-----------|------------------------------------------------------------------------------------------------------------------------------------------------------------------------------------------------------------------------------------------------|--------------------------------------------------------------------------------------------------------------------------------------------------------------------------------------------------------------------------------------------------------------------------------------------------------------------------------------------------------------------------------------------------------------------------------------------------------------------------------------------------------------------------------------------------------------------------------------|-----------|-------------|-------------|-----------|----------|------------|---------------|
| 17        | Does the company fortify only products of high underlying nutritional quality, i.e. meeting certain nutrition criteria?                                                                                                                        | Yes, meeting nutrition criteria in its NPS<br>Yes, meeting other nutrition criteria<br>No<br>No information<br>Not applicable                                                                                                                                                                                                                                                                                                                                                                                                                                                        | ATNI      | 1           | 1           | 1         | 2        | 1          | 2             |
| 18        | Does the company publicly state that its approach to formulation or reformulating products is aligned to (inter)national (or regional, e.g. EU) dietary guidelines?                                                                            | International, national or regional (e.g. EU) dietary guidelines<br>No commitment to reformulating products or no information<br>Not applicable                                                                                                                                                                                                                                                                                                                                                                                                                                      | ATNI      | 3           | 2           | 2         | 1        | 1          | 3             |
| 19        | Does the company base its approach to fortification of products aimed at addressing undernutrition on international guidance on fortification (i.e. CODEX CAC/GL 9-1987 and the WHO/FAO Guidelines on Food Fortification with Micronutrients)? | Yes; No; No information; Not applicable<br><br>Additional information: WHO/FAO Guidelines on Food Fortification with Micronutrients: For this indicator to be scored, both guidelines should be followed, or it should be clear that their approach is equivalent.                                                                                                                                                                                                                                                                                                                   | ATNI      | 1           | 2           | 2         | 2        | 1          | 2             |
| 20        | To which brands does the NPM or similar tool apply?                                                                                                                                                                                            | All brands it sells, i.e., own-brand, white-label and manufacturer brands<br>Its own-brand products ONLY<br>No/ no information found                                                                                                                                                                                                                                                                                                                                                                                                                                                 | ATNI UK   | 1           | 2           | 1         | 2        | 1          | 2             |
| 21        | Which products and categories are covered by the company's NPM or similar tool?                                                                                                                                                                | All products and product categories<br>Some products and product categories<br>No NPM/ no information found<br><br>For the highest score, a company must show that all its products developed and/or reformulated are guided by its NPM or similar tool. Exclusion of products and product categories will reward the second answer option unless the company can explain the reason for exclusion.                                                                                                                                                                                  | ATNI UK   | 1           | 2           | 1         | 2        | 1          | 2             |
| 22        | How does the company use the nutrient profiling model?                                                                                                                                                                                         | Product formulation and marketing<br>Product formulation or marketing<br>Other more limited uses (e.g. FOP labelling, healthy logo, healthy checkouts, % of sales)<br>No/no information found                                                                                                                                                                                                                                                                                                                                                                                        | ATNI UK   | 2           | 2           | 1         | 2        | 1          | 2             |
| 23        | To which sugar reduction targets has the company committed?                                                                                                                                                                                    | Current PHE ambition (20% reduction by 2020, from 2015 baseline) to all PHE categories (as relevant to retailer's range)<br>Current PHE ambition from 2017 baseline to some but not all PHE categories<br>A different target and/or using a different baseline<br>No/no information found<br><br>Note that with regards to its sugar reduction programme, PHE will publish a progress report in 2021, as the current programme runs until the end of 2020. PHE sugar reduction ambitions cover nine food categories that most contribute to the intakes of children (aged up to 18). | ATNI UK   | 2           | 3           | 3         | 1        | 1          | 3             |
| 24        | To which calorie reduction targets has the company committed?                                                                                                                                                                                  | PHE 2024 ambition from 2017 baseline to all PHE categories (as relevant to retailer's range)<br>PHE 2024 ambition from 2017 baseline to some but not all PHE categories<br>A different target and/or using a different baseline<br>No/no information found<br><br>Calorie reduction targets set by PHE are as follows: 10% calorie reduction from 2017 for most categories relevant to retailers and branded products; 10% reduction for children's meal bundles; crisps and savoury snacks (5%), sandwich category (5%).                                                            | ATNI UK   | 2           | 3           | 3         | 1        | 1          | 3             |

| metric ID | Metric                                                                                                                                                                                                         | Details for Metric use   Scoring Criteria                                                                                                                                                                                                                                                                                                                                                                                                                                                                                                                                                                                                                                                                                                                                                                                                                                     | Framework | Materiality | Objectivity | Alignment | Activity | Resolution | Verifiability |
|-----------|----------------------------------------------------------------------------------------------------------------------------------------------------------------------------------------------------------------|-------------------------------------------------------------------------------------------------------------------------------------------------------------------------------------------------------------------------------------------------------------------------------------------------------------------------------------------------------------------------------------------------------------------------------------------------------------------------------------------------------------------------------------------------------------------------------------------------------------------------------------------------------------------------------------------------------------------------------------------------------------------------------------------------------------------------------------------------------------------------------|-----------|-------------|-------------|-----------|----------|------------|---------------|
| 25        | To which salt/sodium reduction targets has the company committed?                                                                                                                                              | <p>PHE targets for 2024 to all PHE categories (as relevant to retailer's range)</p> <p>PHE targets for 2024 to some but not all PHE categories</p> <p>Earlier PHE target (i.e. 2017 targets against 2014 baseline) to all PHE categories (as relevant to retailer's range)</p> <p>Earlier PHE target (i.e. 2017 targets against 2014 baseline) to some but not all PHE categories</p> <p>A different target and/ or using a different baseline</p> <p>No/no information found</p> <p>Note that PHE targets are absolute not relative to a baseline year and indicate reduction targets for salt/sodium per 100g.</p> <p>There are 2024 salt reduction targets for 11 food categories (24 sub-categories), based on the 10 most popular food groups purchased in the eating out, takeaway and delivery sector with the addition of a specific target for children's meals.</p> | ATNI UK   | 2           | 3           | 3         | 1        | 1          | 3             |
| 26        | Has the company set a target and/or baseline to reduce levels or achieve lower stated levels of saturated fats and, if so, in how many products or categories?                                                 | <p>The company has set a target and baseline to reduce saturated fats for all relevant products or categories</p> <p>The company has set a target and baseline to reduce saturated fats for some but not all relevant products</p> <p>The company has set a target but no baseline to reduce saturated fats for all relevant products</p> <p>The company has set a target but no baseline to reduce saturated fats for some but not all relevant products</p> <p>No/no information found</p> <p>The Scientific Advisory Committee on Nutrition (SACN) advice states that saturated fats should be reduced to no more than about 10% of dietary energy.</p>                                                                                                                                                                                                                    | ATNI UK   | 2           | 2           | 2         | 2        | 1          | 2             |
| 27        | Has the company set a target and timeline to reduce (or to maintain if the target has already been achieved) the level of industrial trans fats (iTFA) in relevant products to <2g iTFA per 100g of fats/oils? | <p>Yes, explicitly to less than 2g per 100g of fats/oils for 2023 or sooner</p> <p>Yes, explicitly to less than 2g per 100g of fats/oils but beyond 2023</p> <p>Yes, but not explicitly to less than 2g per 100g of fats/oils</p> <p>No/no information found</p> <p>Note that as PHE does not have an iTFA reduction programme, ATNI recommends the industry to align with global trans fat elimination targets set by the World Health Organisation. WHO recommends that the amount of industrial trans-fat (iTFA) in products does not exceed 2g of iTFAs per 100g fat/oil globally by 2023.</p>                                                                                                                                                                                                                                                                            | ATNI UK   | 2           | 3           | 3         | 2        | 1          | 2             |
| 28        | 6.1 Has the company made a commitment to increase levels or to achieve a higher level of F&V in its packaged products?                                                                                         | <p>Yes</p> <p>No/ no information found</p> <p>Note that PHE has not set such targets therefore these indicators are not linked to a PHE programme.</p> <p>In scope would be: fresh, canned or frozen fruit and vegetables; dried fruit; fruit juice, vegetable juice or smoothie; beans and pulses. For more detail please refer to NHS guidance.</p>                                                                                                                                                                                                                                                                                                                                                                                                                                                                                                                         | ATNI UK   | 2           | 2           | 1         | 1        | 1          | 3             |
| 29        | Has the company set a target level for F&V in its product categories, which it aims to achieve?                                                                                                                | <p>The company has set a target and baseline for all relevant products</p> <p>The company has set a target and baseline for some but not all relevant products</p> <p>The company has set a target, but no baseline, for all relevant products</p> <p>The company has set a target, but no baseline, for some but not all relevant products</p> <p>No/no information found</p>                                                                                                                                                                                                                                                                                                                                                                                                                                                                                                | ATNI UK   | 2           | 2           | 1         | 2        | 1          | 2             |
| 30        | Has the company made a commitment to increase levels or to achieve a higher level of wholegrains in its packaged products?                                                                                     | <p>Yes</p> <p>No/no information found</p>                                                                                                                                                                                                                                                                                                                                                                                                                                                                                                                                                                                                                                                                                                                                                                                                                                     | ATNI UK   | 2           | 2           | 1         | 1        | 1          | 3             |

| metric ID | Metric                                                                                                                                | Details for Metric use   Scoring Criteria                                                                                                                                                                                                                                                                                                                                                                                                                                                                                                                                                         | Framework | Materiality | Objectivity | Alignment | Activity | Resolution | Verifiability |
|-----------|---------------------------------------------------------------------------------------------------------------------------------------|---------------------------------------------------------------------------------------------------------------------------------------------------------------------------------------------------------------------------------------------------------------------------------------------------------------------------------------------------------------------------------------------------------------------------------------------------------------------------------------------------------------------------------------------------------------------------------------------------|-----------|-------------|-------------|-----------|----------|------------|---------------|
|           |                                                                                                                                       | Note that PHE does not have a wholegrain enhancement programme.<br>ATNI follows the Australia and New Zealand Food Standards definition: 'Wholegrain food is any food which uses every part of the grain including the outer layers, bran and germ.'                                                                                                                                                                                                                                                                                                                                              |           |             |             |           |          |            |               |
| 31        | Has the company set a target level for wholegrains in product categories, which it aims to achieve?                                   | The company has set a target and baseline for all relevant products<br>The company has set a target and baseline for some but not all relevant products<br>The company has set a target, but no baseline, for all relevant products<br>The company has set a target, but no baseline, for some but not all relevant products<br>No/no information found                                                                                                                                                                                                                                           | ATNI UK   | 2           | 2           | 1         | 2        | 1          | 2             |
| 32        | Has the company committed to offer smaller-sized portions/lower serving size on products not meeting the company's healthy standards? | Yes, clear comprehensive programme of portion reduction<br>Yes, clear comprehensive programme for serving-size reduction<br>No/no information found<br>Tick all that apply.<br><br>PHE acknowledges that reformulating product recipes and/or reducing portion sizes can help consumers lower their intake of those nutrients that contribute to poor health.<br>Portion reduction refers to reducing size of products in single-portion packs.<br>Serving size reduction refers to reducing size of servings of products in multi-portion packs.                                                 | ATNI UK   | 2           | 2           | 2         | 1        | 1          | 3             |
| 33        | What progress has the company made in achieving its sugar reduction targets?                                                          | On track to meet PHE ambition for 2020<br>Some explicit progress made towards PHE ambition(s) since previous year/reporting period<br>Some progress but not explicitly linked to target (e.g. tonnage) or towards own (not PHE) targets<br>No progress since last year/no target/ no information found<br><br>Note that with regards to its sugar reduction programme, PHE will publish a progress report in 2021, as the current programme runs until the end of 2020.<br>PHE sugar reduction ambitions cover nine food categories contributing most to the intakes of children (aged up to 18). | ATNI UK   | 2           | 2           | 2         | 3        | 1          | 2             |
| 34        | What progress has the company made in reducing sugar levels in its own-brand soft drinks?                                             | No own-brand soft drinks now subject to SDIL<br>Reduction in number of own-brand soft drinks subject to SDIL<br>No progress/no information found<br><br>SDIL refers to the UK Soft Drinks Industry Levy that applies to the producers and importers of soft drinks containing added sugar.                                                                                                                                                                                                                                                                                                        | ATNI UK   | 2           | 3           | 2         | 3        | 1          | 2             |
| 35        | What progress has the company made in achieving its calorie reduction targets?                                                        | On track to meet PHE ambition for 2024<br>Some explicit progress made towards original PHE ambition(s) since previous year/reporting period<br>Some progress but not explicitly linked to ambition (e.g. tonnage) or towards own (not PHE) targets<br>No progress since last year/no target/no information found<br><br>PHE calorie reduction ambitions for 2024 against a 2017 baseline were announced in 2018 (originally with a 20% ambition) and modified in 2020 (with a 5% or 10% ambition depending on category).                                                                          | ATNI UK   | 2           | 2           | 3         | 3        | 1          | 2             |
| 36        | Has the company achieved its target to reduce levels or to achieve a lower specified level of salt/sodium?                            | Completely achieved<br>On track to meet the 2017 PHE target for salt/sodium reduction<br>Some explicit progress made towards PHE ambition(s) since previous year/reporting period<br>Some progress but not explicitly linked to target (e.g. tonnage) or towards own (not PHE) targets                                                                                                                                                                                                                                                                                                            | ATNI UK   | 2           | 2           | 3         | 3        | 1          | 2             |

| metric ID | Metric                                                                                                                                              | Details for Metric use   Scoring Criteria                                                                                                                                                                                                                                                                                                                                                                                                                                                                                                                                                                                                                                                                                                                                                        | Framework | Materiality | Objectivity | Alignment | Activity | Resolution | Verifiability |
|-----------|-----------------------------------------------------------------------------------------------------------------------------------------------------|--------------------------------------------------------------------------------------------------------------------------------------------------------------------------------------------------------------------------------------------------------------------------------------------------------------------------------------------------------------------------------------------------------------------------------------------------------------------------------------------------------------------------------------------------------------------------------------------------------------------------------------------------------------------------------------------------------------------------------------------------------------------------------------------------|-----------|-------------|-------------|-----------|----------|------------|---------------|
|           |                                                                                                                                                     | No progress since last year/no target/no information found<br><br>New salt reduction targets were published by PHE in September 2020 and include a target for salt/sodium per 100g. ATNI will assess commitment indicators against the latest targets, but will only assess performance against the former targets (those set in 2017) to provide retailers with a reasonable window of time for adjustment.                                                                                                                                                                                                                                                                                                                                                                                     |           |             |             |           |          |            |               |
| 37        | What progress has the company made in achieving its saturated fats target?                                                                          | Completely achieved<br>On track to meet its target<br>Some explicit progress made towards target since previous year<br>Some progress but not explicitly linked to target<br>Not on track to meet its target/no progress since last year/no target/no information found<br><br>The Scientific Advisory Committee on Nutrition (SACN) advice states that saturated fats should be reduced to no more than 10% of dietary energy.                                                                                                                                                                                                                                                                                                                                                                  | ATNI UK   | 2           | 2           | 3         | 3        | 1          | 2             |
| 38        | Has the company achieved its target to reduce the level of industrial trans fats (iTFA) in relevant products to <2g iTFA per 100g of fat/oil?       | Completely achieved<br>On track to meet its target/some progress made<br>Not on track to meet its target/no progress since last year/no target/no information found<br><br>WHO recommends that the amount of industrial trans-fat (iTFA) in products does not exceed 2g of iTFA per 100g fat/oil globally by 2023.                                                                                                                                                                                                                                                                                                                                                                                                                                                                               | ATNI UK   | 2           | 2           | 3         | 3        | 1          | 2             |
| 39        | Has the company achieved its target to increase levels or to achieve a higher stated level of fruits and vegetables in its packaged products?       | Completely achieved<br>On track to meet its target/some explicit progress made towards target since previous year<br>Some progress reported but not explicitly linked to target<br>Not on track to meet its target/no progress since last year/no target/no information found                                                                                                                                                                                                                                                                                                                                                                                                                                                                                                                    | ATNI UK   | 2           | 1           | 1         | 3        | 1          | 2             |
| 40        | Has the company achieved its target to increase levels or to achieve a higher stated level of wholegrains in its packaged products?                 | Completely achieved<br>On track to meet its target/some progress made since previous year<br>Some progress reported but not explicitly linked to target<br>No progress since last year/no target/no information found                                                                                                                                                                                                                                                                                                                                                                                                                                                                                                                                                                            | ATNI UK   | 2           | 1           | 1         | 3        | 1          | 2             |
| 41        | Does the company provide any evidence of having reduced portions/serving size for less healthy products?                                            | On track to meet its targets for both portion and serving size reductions<br>On track to meet its targets for either portion or serving-size reductions<br>Some evidence of both portion and serving size reduction but not linked to target<br>Some evidence of either portion or serving size reduction but not linked to target<br>No progress since last year/no target/no information found<br><br>PHE acknowledges that reformulating product recipes and/or reducing portion sizes can help consumers lower their intake of those nutrients that contribute to poor health. Portion reduction refers to reducing size of products marked as providing one portion. Serving size reduction refers to reducing size of servings within a product marked as providing more than one portion. | ATNI UK   | 2           | 1           | 2         | 3        | 1          | 2             |
| 42        | Does the company provide any evidence of engaging with manufacturers of branded products about improving the nutritional quality of their products? | Evidence of extensive engagement<br>Evidence of initial engagement<br>No/no information found<br><br>A company must show evidence of engagement with manufacturers with the intention to improve the nutritional quality of manufacturers' branded products, whether by R&D, reformulation, or portfolio development already realised or by targets/plans to do so in the future. Evidence of extensive engagement would include examples of such engagement and its results. This can be either through reducing negative components (e.g. sugar, salt/sodium, fat)                                                                                                                                                                                                                             | ATNI UK   | 1           | 1           | 1         | 2        | 1          | 1             |

| metric ID | Metric                                                                                                                                                      | Details for Metric use   Scoring Criteria                                                                                                                                                                                                                                                                                                                                                                                                                              | Framework | Materiality | Objectivity | Alignment | Activity | Resolution | Verifiability |
|-----------|-------------------------------------------------------------------------------------------------------------------------------------------------------------|------------------------------------------------------------------------------------------------------------------------------------------------------------------------------------------------------------------------------------------------------------------------------------------------------------------------------------------------------------------------------------------------------------------------------------------------------------------------|-----------|-------------|-------------|-----------|----------|------------|---------------|
|           |                                                                                                                                                             | or through increasing positive components (e.g. fruit, vegetables, nuts and legumes). Please indicate which of the two tactics above is used (information only).                                                                                                                                                                                                                                                                                                       |           |             |             |           |          |            |               |
| 43        | Has the company committed to stop selling energy drinks to children?                                                                                        | Yes, including to children under the age of 18<br>Yes, but only to children under the age of 16<br>No/no information found<br><br>The July 2019 Prevention Green Paper announced ending the sale of energy drinks to children under the age of 16 as part of its Childhood Obesity Strategy. No statutory ban is in place as of October 2020. Thus, a voluntary commitment is still relevant – and retailers could, in any case, extend this to children up to age 18. | ATNI UK   | 1           | 2           | 2         | 1        | 1          | 3             |
| 44        | Does the company provide evidence of ending the sales of energy drinks to children?                                                                         | Yes, including children under the age of 18<br>Yes, only to children under the age of 16<br>No/no information found<br><br>Evidence could include internal communications instructing staff about energy-drinks sales policy.                                                                                                                                                                                                                                          | ATNI UK   | 1           | 2           | 1         | 3        | 1          | 2             |
| 45        | Has the company set targets to increase sales of healthy products and/or decrease sales from less healthy products?                                         | Yes, clear and timebound<br>Yes, clear but not timebound<br>Yes, without SMART elements<br>No/no information found<br><br>Clear and timebound means with a baseline year and a target.<br>Note that Topic 3 has indicators relating to targets for specific food components; the focus here is on the aggregate measures.                                                                                                                                              | ATNI UK   | 3           | 1           | 1         | 2        | 1          | 2             |
| 46        | Has the company set targets to increase sales of (fresh, dried, tinned/canned and frozen) fruit and vegetables?                                             | Yes, clear and timebound<br>Yes, clear but not timebound<br>Yes, without SMART elements<br>No/no information found<br><br>Clear and timebound means with a baseline year and a target.                                                                                                                                                                                                                                                                                 | ATNI UK   | 2           | 1           | 1         | 2        | 1          | 2             |
| 47        | Has the company achieved its targets related to increasing sales of fruit and veg?                                                                          | Completely achieved<br>Some progress made since previous year<br>No/no information found                                                                                                                                                                                                                                                                                                                                                                               | ATNI UK   | 2           | 2           | 1         | 3        | 1          | 2             |
| 48        | Can the company provide evidence of having increased the sales of healthy packaged products relative to other products in the last financial year?          | Yes, also relative to overall sales<br>Yes, relative to previous year's sales of healthy products<br>No/no information found<br><br>The information provided here should apply to food retail operations in the UK as a whole.                                                                                                                                                                                                                                         | ATNI UK   | 2           | 1           | 1         | 3        | 1          | 2             |
| 49        | Can the company provide evidence of having increased the sales of fruit and vegetables (fresh, dried, tinned/canned and frozen) in the last financial year? | Yes<br>No/no information found<br><br>The information provided here should apply to food retail operations in the UK as a whole.                                                                                                                                                                                                                                                                                                                                       | ATNI UK   | 2           | 2           | 1         | 3        | 1          | 2             |
| 50        | Has the percentage of sales volumes subject to the SDIL decreased in the last financial year?                                                               | Yes<br>Sales volume subject to SDIL already 0 in previous financial year<br>No/no information found<br><br>SDIL refers to the UK Soft Drinks Industry Levy that applies to the producers and importers of soft drinks containing added sugar.                                                                                                                                                                                                                          | ATNI UK   | 2           | 3           | 2         | 3        | 1          | 1             |

| metric ID | Metric                                                                                                                                                                                                                                                                           | Details for Metric use   Scoring Criteria                                                                                                                                                                                                                                                                                                                                                                                                                                                                                                                                                                                                                                                                                                    | Framework   | Materiality | Objectivity | Alignment | Activity | Resolution | Verifiability |
|-----------|----------------------------------------------------------------------------------------------------------------------------------------------------------------------------------------------------------------------------------------------------------------------------------|----------------------------------------------------------------------------------------------------------------------------------------------------------------------------------------------------------------------------------------------------------------------------------------------------------------------------------------------------------------------------------------------------------------------------------------------------------------------------------------------------------------------------------------------------------------------------------------------------------------------------------------------------------------------------------------------------------------------------------------------|-------------|-------------|-------------|-----------|----------|------------|---------------|
|           |                                                                                                                                                                                                                                                                                  | This indicator refers not only to own-brand products, but also to manufacturer-brand products.                                                                                                                                                                                                                                                                                                                                                                                                                                                                                                                                                                                                                                               |             |             |             |           |          |            |               |
| 51        | Has the amount the company has paid for the SDIL decreased in the last financial year?                                                                                                                                                                                           | The amount paid for the SDIL by the company was already zero in the last financial year<br>Yes<br>No/no information found<br><br>Only applicable to own-brand products.                                                                                                                                                                                                                                                                                                                                                                                                                                                                                                                                                                      | ATNI UK     | 1           | 3           | 2         | 3        | 1          | 2             |
| 52        | Does the company commit to use the Food Standards Agency 2004–2005 NPM without adaptations to assess products' nutritional quality?                                                                                                                                              | Yes, without adaptations<br>Yes, with adaptations<br>No/no information found<br><br>If the company uses the Food Standards Agency 2004–2005 NPM without adaptations to assess products' nutritional quality, it is awarded full points for this Performance section and the rest of the indicators about the model design are automatically disabled, apart from indicator 5 in this topic.                                                                                                                                                                                                                                                                                                                                                  | ATNI UK     | 2           | 2           | 3         | 1        | 1          | 3             |
| 53        | What types of food components does the company's NPM assess?                                                                                                                                                                                                                     | Both 'positive' components and 'negative' components<br>Negative food components only<br>None (no NPM)/no information found<br><br>Positive components include fibre, protein, fruit, vegetables and nuts/legumes<br>Negative components include energy, saturated fat, sugars and salt/sodium                                                                                                                                                                                                                                                                                                                                                                                                                                               | ATNI UK     | 1           | 2           | 1         | 2        | 1          | 2             |
| 54        | What type of score/rating does the NPM/similar tool generate for each product?                                                                                                                                                                                                   | Overall nutritional quality score on a sliding scale<br>High/medium/low or red/amber/green indication for only some nutrients/food components<br>None (no NPM) or no information found                                                                                                                                                                                                                                                                                                                                                                                                                                                                                                                                                       | ATNI UK     | 1           | 3           | 1         | 2        | 1          | 2             |
| 55        | Does the company publish a comprehensive set of commitments or objectives related to new product development and reformulating its existing products with respect to reducing the nutrients of concern and energy (salt, saturated fats, trans fats, free sugar and kilojoules)? | 10: Yes, specific national-level commitments/objectives that are publicly available or specific global commitments/objectives that include specific reference to the country or market in question<br>7.5: Yes, specific global commitments/objectives that could specifically apply to the country in question that are publicly available<br>5: Has specific national-level commitments/objectives, but not publicly available<br>2.5: Has national or global-level commitments/objectives in this area that are available publicly, but these commitments/objectives are vague and non-specific OR has global commitments/objectives but not publicly available<br>0: No commitment/ no policy information available to the research team | BIA-Obesity | 1           | 1           | 1         | 1        | 1          | 2             |
| 56        | Is the company a signatory to national and/or global industry initiatives on product reformulation or do they commit to national voluntary government programs on product reformulation (where applicable)?                                                                      | 5: Yes, and noted on company website / annual reports<br>2.5 Yes, but not noted on company website / annual reports (e.g. government/ NGO/ industry organisation's website or disclosed directly to INFORMAS)<br>0: No / no information                                                                                                                                                                                                                                                                                                                                                                                                                                                                                                      | BIA-Obesity | 2           | 2           | 2         | 1        | 1          | 3             |
| 57        | Has the company set a target/targets or provided detailed evidence of having taken significant action to reduce/reach lower levels of salt/sodium in products, and is applicable to the country in question? Provide baseline year, target year, and targets.                    | 10: Set SMART targets or provided detailed evidence of having taken significant action in all key categories/subcategories, published<br>5: Targets (not necessarily SMART) set or significant action taken in some key products/sub-categories / not published<br>2.5: General commitment to reducing levels of salt/sodium in products (vague or global level only), published or disclosed to INFORMAS team<br>0: No target / no information                                                                                                                                                                                                                                                                                              | BIA-Obesity | 2           | 2           | 1         | 2        | 3          | 2             |

| metric ID | Metric                                                                                                                                                                                                                                                                                                      | Details for Metric use   Scoring Criteria                                                                                                                                                                                                                                                                                                                                                                                                                                                                                                                                                                                                                                                      | Framework   | Materiality | Objectivity | Alignment | Activity | Resolution | Verifiability |
|-----------|-------------------------------------------------------------------------------------------------------------------------------------------------------------------------------------------------------------------------------------------------------------------------------------------------------------|------------------------------------------------------------------------------------------------------------------------------------------------------------------------------------------------------------------------------------------------------------------------------------------------------------------------------------------------------------------------------------------------------------------------------------------------------------------------------------------------------------------------------------------------------------------------------------------------------------------------------------------------------------------------------------------------|-------------|-------------|-------------|-----------|----------|------------|---------------|
| 58        | Has the company set a target/targets or provided detailed evidence of having taken significant action to reduce artificial trans fat added to products during the manufacturing process, and is applicable to the country in question? Provide baseline year, target year, and targets.                     | 10: Set a target or provided detailed evidence of having taken significant action to eliminate trans fat in all relevant categories/subcategories, published<br>5: Set a target or taken significant action to eliminate/reduce in some relevant products/sub-categories / not published<br>2.5: General commitment to reducing/eliminating use of trans fats in products (vague or global level only), published or disclosed to INFORMAS team<br>0: No target / no information                                                                                                                                                                                                               | BIA-Obesity | 2           | 2           | 1         | 2        | 3          | 2             |
| 59        | Has the company set a target/targets or provided detailed evidence of having taken significant action to reduce/reach lower levels of saturated fats, and is applicable to the country in question? Provide baseline year, target year, and targets.                                                        | 10: Set SMART targets or provided detailed evidence of having taken significant action in all key categories/subcategories, published<br>5: Targets (not necessarily SMART) set / taken significant action in some key products/sub-categories / not published<br>2.5: General commitment to reducing use of saturated fats in products (vague or global level only), published or disclosed to INFORMAS team<br>0: No target / no information                                                                                                                                                                                                                                                 | BIA-Obesity | 2           | 2           | 1         | 2        | 3          | 2             |
| 60        | Has the company set a target/targets or provided detailed evidence of having taken significant action to reduce/reach lower levels of free sugars, and is applicable to the country in question? Provide baseline year, target year, and targets.                                                           | 10: Set SMART targets or provided detailed evidence of having taken significant action in all key categories/subcategories, published<br>5: Targets (not necessarily SMART) set / taken significant action in some key products/sub-categories / not published<br>2.5: General commitment to reducing use of free sugars in products (vague or global level only), published or disclosed to INFORMAS team<br>0: No target / no information                                                                                                                                                                                                                                                    | BIA-Obesity | 2           | 2           | 1         | 2        | 3          | 2             |
| 61        | Does the company have a target/targets or provided detailed evidence of having taken significant action to reduce the portion size / energy content of single serve snacks, and is applicable to the country in question? Provide baseline year, target year, and targets.                                  | 10: Set SMART targets or provided detailed evidence of having taken significant action in all key categories/subcategories, published<br>5: Targets (not necessarily SMART) set / taken significant action in some key products/sub-categories / not published<br>2.5: General commitment to reducing portion size / energy content in products (vague or global level only), published or disclosed to INFORMAS team<br>0: No target / no information                                                                                                                                                                                                                                         | BIA-Obesity | 2           | 2           | 1         | 2        | 3          | 2             |
| 62        | What system / criteria (e.g., product classification system or nutrient profiling system) does the company use to classify the healthiness of products for the purposes of product development / reformulation? If a proprietary NPS, detail which products, nutrients and food characteristics are covered | 10: Uses government guidelines/government endorsed classification system (where available)<br>7.5: Publicly available system, developed in consultation with experts and in line with government guidelines, published in peer reviewed literature<br>5: Publicly available system, developed in consultation with experts and in line with government guidelines (not published in peer reviewed literature)<br>2.5: Publicly available system with no details of development/alignment with government guidelines OR not publicly available but developed in consultation with experts and aligned with government guidelines<br>0: No information / poor alignment / does not have a system | BIA-Obesity | 2           | 2           | 2         | 2        | 2          | 2             |
| 63        | Does the company have a policy to increase the number/proportion of healthy products in the company's portfolio?                                                                                                                                                                                            | 10: Clear and specific commitment to increase the proportion of healthy products across portfolio, published and applied nationally<br>7.5: Clear and specific commitment to increase the proportion of healthy products across portfolio, not published and applied nationally<br>5: General commitment to increasing the number of healthy products across the portfolio, published, global or national.<br>2.5: General commitment to increasing the number of healthy products across the portfolio, not published, global or national.<br>0: No commitment / no information                                                                                                               | BIA-Obesity | 3           | 1           | 1         | 1        | 1          | 2             |



| metric ID | Metric                                                                                                                                                                                                                                                                                  | Details for Metric use   Scoring Criteria                                                                                                                                                                                                                                                                                                                                                                                                                                                                                                                                                                                                                                                                                                    | Framework   | Materiality | Objectivity | Alignment | Activity | Resolution | Verifiability |
|-----------|-----------------------------------------------------------------------------------------------------------------------------------------------------------------------------------------------------------------------------------------------------------------------------------------|----------------------------------------------------------------------------------------------------------------------------------------------------------------------------------------------------------------------------------------------------------------------------------------------------------------------------------------------------------------------------------------------------------------------------------------------------------------------------------------------------------------------------------------------------------------------------------------------------------------------------------------------------------------------------------------------------------------------------------------------|-------------|-------------|-------------|-----------|----------|------------|---------------|
| 64        | Does the company publish a comprehensive set of commitments or objectives related to new product development and reformulating its existing products with respect to reducing the nutrients of concern and energy (salt, saturated fats, trans fats, free sugar and kilojoules)?        | 10: Yes, specific national-level commitments/objectives that are publicly available or specific global commitments/objectives that include specific reference to the country or market in question<br>7.5: Yes, specific global commitments/objectives that could specifically apply to the country in question that are publicly available<br>5: Has specific national-level commitments/objectives, but not publicly available<br>2.5: Has national or global-level commitments/objectives in this area that are available publicly, but these commitments/objectives are vague and non-specific OR has global commitments/objectives but not publicly available<br>0: No commitment/ no policy information available to the research team | BIA-Obesity | 1           | 2           | 1         | 1        | 1          | 2             |
| 65        | Is the company a signatory to national and/or global industry initiatives on product reformulation or do they commit to national voluntary government programs on product reformulation (where applicable)?                                                                             | 5: Yes, and noted on company website / annual reports<br>2.5 Yes, but not noted on company website / annual reports (e.g. government/ NGO/ industry organisation's website or disclosed directly to INFORMAS)<br>0: No / no information                                                                                                                                                                                                                                                                                                                                                                                                                                                                                                      | BIA-Obesity | 1           | 2           | 2         | 1        | 1          | 2             |
| 66        | Has the company set a target/targets or provided detailed evidence of having taken significant action to reduce artificial trans fat added to products during the manufacturing process, and is applicable to the country in question? Provide baseline year, target year, and targets. | 10: Set a target or provided detailed evidence of having taken substantive action to eliminate artificial trans fat in all relevant categories/subcategories, published<br>5: Set a target or provided detailed evidence of having taken substantive action to eliminate/reduce in some relevant products/sub-categories / not published<br>2.5: General commitment to reducing/eliminating use of trans fats in products (vague or global level only), published or disclosed to INFORMAS team<br>0: No target / no information                                                                                                                                                                                                             | BIA-Obesity | 2           | 2           | 1         | 2        | 3          | 2             |
| 67        | Has the company set a target/targets or provided detailed evidence of having taken significant action to reduce/reach lower levels of saturated fats, and is applicable to the country in question? Provide baseline year, target year, and targets.                                    | 5: Set SMART target or provided detailed evidence of having taken substantive action for children's meals, published (2.5 if not published, or not SMART)<br>5: Set SMART target or provided detailed evidence of having taken substantive action for other relevant products/sub-categories, published (2.5 if not published, or not SMART)<br>0: No target / no information                                                                                                                                                                                                                                                                                                                                                                | BIA-Obesity | 2           | 2           | 1         | 2        | 3          | 2             |
| 68        | Does the restaurant have commitments or taken substantive action to improving the healthiness of oils used in frying foods/frying practices? (if applicable)                                                                                                                            | 5: Does not fry foods, or commits to using non-hydrogenated vegetable oils<br>0: No commitments / no information available to the research team                                                                                                                                                                                                                                                                                                                                                                                                                                                                                                                                                                                              | BIA-Obesity | 1           | 2           | 1         | 1        | 1          | 3             |
| 69        | Has the company set a target/targets or provided detailed evidence of having taken significant action to reduce/reach lower levels of free sugars, and is applicable to the country in question? Provide baseline year, target year, and targets.                                       | 5: Set SMART target or provided detailed evidence of having taken substantive action for children's meals, published (2.5 if not published, or not SMART)<br>5: Set SMART target or provided detailed evidence of having taken substantive action for other relevant products/sub-categories, published (2.5 if not published, or not SMART)<br>0: No target / no information                                                                                                                                                                                                                                                                                                                                                                | BIA-Obesity | 2           | 2           | 1         | 2        | 3          | 2             |
| 70        | Does the company have a target/targets or provided detailed evidence of having taken substantive action to reduce portion size / energy content, and is applicable to the country in question? Provide baseline year, target year, and targets.                                         | 5: Set SMART target or provided detailed evidence of having taken substantive action for children's meals, published (2.5 if not published, or not SMART)<br>5: Set SMART target or provided detailed evidence of having taken substantive action for other relevant products/sub-categories, published (2.5 if not published, or not SMART)<br>0: No target / no information                                                                                                                                                                                                                                                                                                                                                                | BIA-Obesity | 2           | 2           | 1         | 2        | 3          | 2             |

| metric ID | Metric                                                                                                                                                                                                                                                                     | Details for Metric use   Scoring Criteria                                                                                                                                                                                                                                                                                                                                                                                                              | Framework   | Materiality | Objectivity | Alignment | Activity | Resolution | Verifiability |
|-----------|----------------------------------------------------------------------------------------------------------------------------------------------------------------------------------------------------------------------------------------------------------------------------|--------------------------------------------------------------------------------------------------------------------------------------------------------------------------------------------------------------------------------------------------------------------------------------------------------------------------------------------------------------------------------------------------------------------------------------------------------|-------------|-------------|-------------|-----------|----------|------------|---------------|
| 71        | Does the company commit to not provide free refills for caloric soft drinks / soda?<br>(ONLY IF APPLICABLE)                                                                                                                                                                | 5: Yes<br>0: No commitment / no policy information available to the research team<br>N/A if no free refills available                                                                                                                                                                                                                                                                                                                                  | BIA-Obesity | 1           | 3           | 1         | 1        | 1          | 3             |
| 72        | Does the company have a policy that 'assigned' or 'default' drink items included as part of children's combination meals are healthy items (e.g., water)?<br>(ONLY IF APPLICABLE)                                                                                          | 5: Yes, healthy drink items are assigned by default for all children's combination meals<br>2.5: Yes, healthy drink items are assigned by default for some children's combination meals<br>0: No commitment/ no policy information available to the research team                                                                                                                                                                                      | BIA-Obesity | 2           | 2           | 1         | 1        | 1          | 3             |
| 73        | Does the company have a policy that 'assigned' or 'default' drink items included as part of 'non-children's' combination meals are healthy items (e.g., water)?<br>(ONLY IF APPLICABLE)                                                                                    | 5: Yes, healthy drink items are assigned by default for all non-children's combination meals<br>0: No commitment/ no policy information available to the research team                                                                                                                                                                                                                                                                                 | BIA-Obesity | 2           | 2           | 1         | 1        | 1          | 3             |
| 74        | Does the company have a policy that 'assigned' or 'default' side items included as part of children's combination meals are healthy items (e.g., salad, fruit, vegetables)?<br>(ONLY IF APPLICABLE)                                                                        | 5: Yes, for all children's meals<br>2.5: Children's combination meals offer healthy side items as one of the options, but not the default<br>0: No commitment/ no policy information available to the research team                                                                                                                                                                                                                                    | BIA-Obesity | 2           | 2           | 1         | 1        | 1          | 3             |
| 75        | Does the company have a policy that 'assigned' or 'default' side items included as part of 'non-children's' combination meals are healthy items (e.g., salad, vegetables)?<br>(ONLY IF APPLICABLE)                                                                         | 5: Yes, for other meals (non-children's meals)<br>2.5: if other meals offer 'healthier' as one of the options, but not the default<br>0: No commitment/ no policy information available to the research team                                                                                                                                                                                                                                           | BIA-Obesity | 2           | 2           | 1         | 1        | 1          | 3             |
| 76        | Is the company a signatory to national and/or global industry initiatives on product reformulation or do they commit to national voluntary government programs on product reformulation (where applicable)?                                                                | 5: Yes, and noted on company website / annual reports<br>2.5 Yes, but not noted on company website / annual reports (e.g. government/ NGO/ industry organisation's website or disclosed directly to INFORMAS)<br>0: No                                                                                                                                                                                                                                 | BIA-Obesity | 1           | 2           | 2         | 1        | 1          | 3             |
| 77        | Has the company set a target/targets or provided detailed evidence of having taken substantive action to reduce/reach lower levels of salt/sodium in products? Provide baseline year, target year, and targets.                                                            | 10: Set SMART targets or provided detailed evidence of having taken substantive action in all key categories/subcategories, published<br>5: Targets (not necessarily SMART) set or substantive action taken in some key products/sub-categories / not published<br>2.5: General commitment to reducing levels of salt/sodium in products (published or disclosed to INFORMAS team)<br>0: No target / no information                                    | BIA-Obesity | 2           | 2           | 1         | 2        | 3          | 2             |
| 78        | Does the company have a target/targets or provided detailed evidence of having taken significant action to reduce the portion size / energy content of single serve snacks, and is applicable to the country in question? Provide baseline year, target year, and targets. | 10: Set SMART targets or provided detailed evidence of having taken significant action in all key categories/subcategories, published<br>5: Targets (not necessarily SMART) set / taken significant action in some key products/sub-categories / not published<br>2.5: General commitment to reducing portion size / energy content in products (vague or global level only), published or disclosed to INFORMAS team<br>0: No target / no information | BIA-Obesity | 2           | 2           | 1         | 2        | 3          | 2             |
| 79        | What system / criteria (e.g., product classification system or nutrient profiling                                                                                                                                                                                          | 10: Uses government guidelines/government endorsed classification system<br>7.5: Publicly available system, developed in consultation with experts and in line with government guidelines, published in peer reviewed literature                                                                                                                                                                                                                       | BIA-Obesity | 2           | 2           | 2         | 2        | 2          | 2             |

| metric ID | Metric                                                                                                                                                                                                                              | Details for Metric use   Scoring Criteria                                                                                                                                                                                                                                                                                                                                                                                                                                                                                                                                                                                                                                                                                                                                                                                                                                                                                                                                                                                                                                                                                                                                                                                                                                                                                                                | Framework | Materiality | Objectivity | Alignment | Activity | Resolution | Verifiability |
|-----------|-------------------------------------------------------------------------------------------------------------------------------------------------------------------------------------------------------------------------------------|----------------------------------------------------------------------------------------------------------------------------------------------------------------------------------------------------------------------------------------------------------------------------------------------------------------------------------------------------------------------------------------------------------------------------------------------------------------------------------------------------------------------------------------------------------------------------------------------------------------------------------------------------------------------------------------------------------------------------------------------------------------------------------------------------------------------------------------------------------------------------------------------------------------------------------------------------------------------------------------------------------------------------------------------------------------------------------------------------------------------------------------------------------------------------------------------------------------------------------------------------------------------------------------------------------------------------------------------------------|-----------|-------------|-------------|-----------|----------|------------|---------------|
|           | system) does the company use to classify the healthiness of products for the purposes of own-brand product development / reformulation? If a proprietary NPS, detail which products, nutrients and food characteristics are covered | 5: Publicly available system, developed in consultation with experts and in line with government guidelines (not published in peer reviewed literature)<br>2.5: Publicly available system with no details of development/alignment with government guidelines OR not publicly available but developed in consultation with experts and aligned with government guidelines<br>0: No information / poor alignment / does not have a system                                                                                                                                                                                                                                                                                                                                                                                                                                                                                                                                                                                                                                                                                                                                                                                                                                                                                                                 |           |             |             |           |          |            |               |
| 80        | percentage of total sales volume of consumer products, by product category, that are lowered in saturated fat, trans fat, sodium and added sugar                                                                                    | Steps required to report:<br>1. identify all consumer product food categories in the company portfolio.<br>2. identify the number of products in each food category which has been lowered in saturated fat, trans fats, sodium and sugars (in total and with sugar substituted by artificial sweetener.<br>3. Calculate the percentage of total sales volume of consumer products, by product category, that are lowered in saturated fat, trans fat, sodium and sugars (in total and with sugar substituted by artificial sweetener).<br>4. Report the percentage of total sales volume of consumer products, by product category, that are lowered in saturated fats, trans fats, sodium and sugars (in total and with sugar substituted by artificial sweetener.)<br>5. report the organization's definition of lowered saturated fat, trans fats, sodium, and sugars.<br>6. report on the policy on nutrition and health when reporting the DMA for the Aspect of Customer Health and Safety                                                                                                                                                                                                                                                                                                                                                        | GRI-Food  | 2           | 2           | 1         | 3        | 3          | 2             |
| 81        | percentage of total sales volume of consumer products, by product category, that contain increased nutritious ingredients like fiber, vitamins, minerals, phytochemicals or functional food additives                               | Steps required to report:<br>1. identify all consumer product food categories in the company portfolio.<br>2. identify the sales volume of consumer products in each food category which contains increased nutritious ingredients like fiber, vitamins, minerals, phytochemicals and functional food additives.<br>3. Identify the total sales volume of consumer products in each product category.<br>4. Calculate the percentage of consumer products sold in each product category, which contains increased nutritious ingredients like fiber, vitamins, minerals, phytochemicals and functional food additives.<br>5. Report rationale and method (retention or addition) for improving consumer products with nutritious ingredients like fiber, vitamins, minerals, phytochemicals, and functional food additives (for example, adding more fruits or vegetables, using whole grain flour instead of white flour, adding probiotics)<br>5. report the organization's definition of lowered saturated fat, trans fats, sodium, and sugars.<br>6. report rationale for increasing product categories with nutritious ingredients like fiber, vitamins, minerals, or phytochemicals<br>7. Report the organization's definition of increased nutritious ingredients like fiber, vitamins, minerals or phytochemicals, and functional food additive. | GRI-Food  | 2           | 2           | 1         | 3        | 3          | 2             |
| 82        | Company has a target for, and reports on, a sales-weighted % increase in healthy food, menu items or products quantified using a transparent and recognized approach                                                                | There is no clear consensus on how to quantify "healthy" food in different sectors. As such the maximum score can be applied for a time-bound target and performance data as long as the methodology is provided by the company. Performance data without a target, or a target without performance data achieve a score of 2. Targets and performance data for single ingredients (eg sugar) or categories (eg HFSS products) achieve a score of 1.<br><br>Scoring guidelines for quantitative metrics with specific targets:<br>3: Company has a clear target and is reporting against the target<br>2: Company reports performance data but not a target, or has a target but is not reporting against the target                                                                                                                                                                                                                                                                                                                                                                                                                                                                                                                                                                                                                                     | PUP       | 3           | 1           | 1         | 3        | 1          | 2             |

| metric ID | Metric                                                                                                                                                               | Details for Metric use   Scoring Criteria                                                                                                                                                                                                                                                                                                                                                                                                                                                                                                                                                                                                                                                                                                                                                                                                                                                                                                             | Framework | Materiality | Objectivity | Alignment | Activity | Resolution | Verifiability |
|-----------|----------------------------------------------------------------------------------------------------------------------------------------------------------------------|-------------------------------------------------------------------------------------------------------------------------------------------------------------------------------------------------------------------------------------------------------------------------------------------------------------------------------------------------------------------------------------------------------------------------------------------------------------------------------------------------------------------------------------------------------------------------------------------------------------------------------------------------------------------------------------------------------------------------------------------------------------------------------------------------------------------------------------------------------------------------------------------------------------------------------------------------------|-----------|-------------|-------------|-----------|----------|------------|---------------|
|           |                                                                                                                                                                      | 1: Company recognises the issue and has taken limited or isolated action<br>0: No evidence is found that a company recognises the issue or is taking action                                                                                                                                                                                                                                                                                                                                                                                                                                                                                                                                                                                                                                                                                                                                                                                           |           |             |             |           |          |            |               |
| 83        | Company has a target for, and reports on, an increase in fruit & veg as % of food procurement or sales.                                                              | No specific notes<br><br>Scoring guidelines for quantitative metrics with specific targets:<br>3: Company has a clear target and is reporting against the target<br>2: Company reports performance data but not a target, or has a target but is not reporting against the target<br>1: Company recognises the issue and has taken limited or isolated action<br>0: No evidence is found that a company recognises the issue or is taking action                                                                                                                                                                                                                                                                                                                                                                                                                                                                                                      | PUP       | 2           | 2           | 1         | 3        | 1          | 2             |
| 84        | Company has a target for, and reports on, a % shift in protein procurement or sales that comes from animal vs plant-based protein sources                            | There is currently no clear consensus on the definition to be used for animal-based vs. plant-based protein sources. The maximum score can be applied for a target and performance data as long as the methodology is provided by the company and both animal-based and plant-based data is included. Partial data (for example data that only refers to plant-based sales) achieve a score of 2. Less specific data around increasing the product range or introducing new plant-based products achieve a score of 1.<br><br>Scoring guidelines for quantitative metrics with specific targets:<br>3: Company has a clear target and is reporting against the target<br>2: Company reports performance data but not a target, or has a target but is not reporting against the target<br>1: Company recognises the issue and has taken limited or isolated action<br>0: No evidence is found that a company recognises the issue or is taking action | PUP       | 1           | 2           | 1         | 3        | 1          | 2             |
| 85        | Company has a target for, and reports on, a sales-weighted % increase in healthy food, menu items or products quantified using a transparent and recognized approach | There is no clear consensus on how to quantify "healthy" food in different sectors. As such the maximum score can be applied for a time-bound target and performance data as long as the methodology is provided by the company. Performance data without a target, or a target without performance data achieve a score of 2. Targets and performance data for single ingredients (eg sugar) or categories (eg HFSS products) achieve a score of 1.<br><br>Scoring guidelines for quantitative metrics with specific targets:<br>3: Company has a clear target and is reporting against the target<br>2: Company reports performance data but not a target, or has a target but is not reporting against the target<br>1: Company recognises the issue and has taken limited or isolated action<br>0: No evidence is found that a company recognises the issue or is taking action                                                                   | PUP       | 3           | 1           | 1         | 3        | 1          | 2             |
| 86        | Company has a target for, and reports on, a % shift in protein procurement or sales that comes from animal vs plant-based protein sources                            | There is currently no clear consensus on the definition to be used for animal-based vs. plant-based protein sources. The maximum score can be applied for a target and performance data as long as the methodology is provided by the company and both animal-based and plant-based data is included. Partial data (for example data that only refers to plant-based sales) achieve a score of 2. Less specific data around increasing the product range or introducing new plant-based products achieve a score of 1.<br><br>Scoring guidelines for quantitative metrics with specific targets:<br>3: Company has a clear target and is reporting against the target<br>2: Company reports performance data but not a target, or has a target but is not reporting against the target<br>1: Company recognises the issue and has taken limited or isolated action<br>0: No evidence is found that a company recognises the issue or is taking action | PUP       | 1           | 2           | 1         | 3        | 3          | 2             |

| metric ID | Metric                                                                                                                           | Details for Metric use   Scoring Criteria                                                                                                                                                                                                                                                                                                                                                                                                                                                                                                                                                                                                                                                                                                                                                                                                                                                                                                                                                                                                                                                                                                                                                                                                                                                                                                                                                                                                                                                | Framework | Materiality | Objectivity | Alignment | Activity | Resolution | Verifiability |
|-----------|----------------------------------------------------------------------------------------------------------------------------------|------------------------------------------------------------------------------------------------------------------------------------------------------------------------------------------------------------------------------------------------------------------------------------------------------------------------------------------------------------------------------------------------------------------------------------------------------------------------------------------------------------------------------------------------------------------------------------------------------------------------------------------------------------------------------------------------------------------------------------------------------------------------------------------------------------------------------------------------------------------------------------------------------------------------------------------------------------------------------------------------------------------------------------------------------------------------------------------------------------------------------------------------------------------------------------------------------------------------------------------------------------------------------------------------------------------------------------------------------------------------------------------------------------------------------------------------------------------------------------------|-----------|-------------|-------------|-----------|----------|------------|---------------|
| 87        | revenue from zero- and low-calorie, no-added-sugar, & artificially sweetened beverages                                           | three categories of non-alcoholic beverages (zero-and low calorie, no-added sugar, and artificially sweetened beverages) are mutually exclusive                                                                                                                                                                                                                                                                                                                                                                                                                                                                                                                                                                                                                                                                                                                                                                                                                                                                                                                                                                                                                                                                                                                                                                                                                                                                                                                                          | SASB      | 2           | 3           | 1         | 3        | 3          | 2             |
| 88        | revenue of products labeled and/or marketed to promote health and nutrition                                                      | <p>products that are labeled to promote health and nutrition attribute contain levels and other written, printed, or graphic matter on the article itself, on any containers or wrappers, or otherwise accompanying the article that promote health and nutrition attributes. Consistent with the AMA's definition of marketing, products are considered to be marketed to promote health and nutrition attributes when the entity communicates, delivers, and exchanges offerings that promote the product's health and nutrition attributes.</p> <p>The scope of products labeled and/or marketed to promote health and nutrition attributes includes products that contain one or more of the following labels and/or marketing claims: additives (e.g. artificial sweeteners, colors, preservatives and industrially produced trans fats) have been eliminated; fat, saturated fat, sodium, and cholesterol are equal to or less than the requirements for the use of the term "healthy" and related terms in the Guidance for Industry: A Food Labeling Guide prescribed by the US FDA; beneficial nutrients (e.g., vitamins A and C, calcium, iron, protein and fiber) meet or exceeds the requirements for the term healthy consistent with FDA guidance; a relative claim (such as light, reduced, or less can be made regarding products added sugar content, consistent with the FDA's guidance</p>                                                                            | SASB      | 1           | 2           | 2         | 3        | 3          | 2             |
| 89        | revenue of products labeled as containing GMOs and non-GMOs                                                                      | <p>GMOs are defined as organisms, with the exception of human beings, in which the genetic material has been altered in a way that does not occur naturally by mating and/or natural recombination, consistent with EU Directive 2001/18/EC. The entity may disclose the revenue from its products that are labeled as (1) containing GMOs and (2) non-GMOs in markets subject to GMO labeling regulation</p> <p>For the purposes of this disclosure, products that are third-party certified to standards for which non-GMO is inherent to the certificate (e.g. USDA Organic certificate) shall be considered to be labeled as non-GMO</p>                                                                                                                                                                                                                                                                                                                                                                                                                                                                                                                                                                                                                                                                                                                                                                                                                                             | SASB      | 1           | 3           | 2         | 3        | 3          | 2             |
| 90        | discussion of process to identify and manage products and ingredients related to nutritional and health concerns among consumers | <p>The entity shall discuss its efforts to identify concerns, the products and ingredients related to those concerns and resultant risks and opportunities. Relevant efforts to discuss include: risk assessments, organization of long-term health or toxicology studies, procedures for receiving/reviewing consumer concerns.</p> <p>The entity shall discuss how identified concerns and risk are managed and communicated. Relevant efforts to discuss include: labeling transparency, phasing out, substituting, updating product portions and product mix, improving nutritional content of products, and/or taking other measures to address consumer concerns, trends, and preferences. The Entity may discuss implementation of relevant food ingredient and additive standards (i.e. Codex Alimentarius). The entity may discuss whether strategies are related to or associated with formal health and nutrition initiative or strategy.</p> <p>The entity shall discuss its use of certification programs that address consumer concerns and preferences over ingredients, additives and potential allergens. Certifications may include USDA Organic, Non-GMO Project certified, and Certified Gluten Free.</p> <p>The entity shall discuss any significant complaints, such as those resulting in significant lawsuits, relating to nutritional or health concerns associated with products and/or ingredients, and any efforts to mitigate the related future risks.</p> | SASB      | 1           | 2           | 1         | 2        | 2          | 1             |
| 91        | percentage of meal options consistent with national dietary guidelines, and revenue from these options                           | National dietary guidelines include: Dietary Guidelines for Americans, Dietary Guidelines for Chinese Residents, EU Food-Based Dietary Guidelines, Other guidelines provided by national governmental agencies or regulators that contain daily nutritional values and are substantially equivalent to guidelines listed above.                                                                                                                                                                                                                                                                                                                                                                                                                                                                                                                                                                                                                                                                                                                                                                                                                                                                                                                                                                                                                                                                                                                                                          | SASB      | 3           | 1           | 2         | 3        | 3          | 1             |

| metric ID | Metric                                                                                                                         | Details for Metric use   Scoring Criteria                                                                                                                                                                                                                                                                                                                                                                                                                                                                                                                                                                                                                                                                                                                                                                                                                                                                                                                                                                                                                                                                                                                                                                                                                                                                                                                                                                                                                                                                                                                                                                                                                                                                                                                                                                                                                                                                                                                                                                                                                                                                                                                                                                                                                                                                                                                                                    | Framework | Materiality | Objectivity | Alignment | Activity | Resolution | Verifiability |
|-----------|--------------------------------------------------------------------------------------------------------------------------------|----------------------------------------------------------------------------------------------------------------------------------------------------------------------------------------------------------------------------------------------------------------------------------------------------------------------------------------------------------------------------------------------------------------------------------------------------------------------------------------------------------------------------------------------------------------------------------------------------------------------------------------------------------------------------------------------------------------------------------------------------------------------------------------------------------------------------------------------------------------------------------------------------------------------------------------------------------------------------------------------------------------------------------------------------------------------------------------------------------------------------------------------------------------------------------------------------------------------------------------------------------------------------------------------------------------------------------------------------------------------------------------------------------------------------------------------------------------------------------------------------------------------------------------------------------------------------------------------------------------------------------------------------------------------------------------------------------------------------------------------------------------------------------------------------------------------------------------------------------------------------------------------------------------------------------------------------------------------------------------------------------------------------------------------------------------------------------------------------------------------------------------------------------------------------------------------------------------------------------------------------------------------------------------------------------------------------------------------------------------------------------------------|-----------|-------------|-------------|-----------|----------|------------|---------------|
|           |                                                                                                                                | <p>Meal option is define as an entree, side, and beverage for limtied service restaurants and an entree and beverage for sull service restaurants. The entity shall use menu items that are commonly paired together by customers, advertised together as combination, or are palced together as a specially promoted combination to determine possible meal combinations. For restaurants where choices are generally a la carte, the entity shall use a consistent approach for calculating meal options using menu items generally paired together as meals. The entity shall use the nutritional content for the standard menu items that are served to the customer by default, without a request for item or ingredient substitution or additions, to calculate nutrient content of a meal option. The percentage is calculated as the number of possible combinations of meal options that aare consistent with 1/3 the daily nutritional values in teh applicable national dietary guidelines divided by the total number of possible combinations of meal options offered by the entity.</p> <p>The entity shall disclose its revenue from the combination of meal options that are consistent with teh applicable national dietary guidelines.</p> <p>The scope of disclosure shall include both company-owned and franchise locations</p> <p>If meal options in a portion of an entity's operations are not tracked in such a manner that allow for precise measurement, estimation isaccettable. If so, the entity shall disclose the estimation methodology used to calculate the sales of combinations of meal options, and teh percentage of operations for which it was employed.</p>                                                                                                                                                                                                                                                                                                                                                                                                                                                                                                                                                                                                                                                                                        |           |             |             |           |          |            |               |
| 92        | percentage of children's meal options consistent with national dietary guidelines for children, and revenue from these options | <p>A childrens meal option is one that is directly targeted at children aged 2-11 years old. National dietary guidelines for children are defined as international, national, regional, or industry guidelines or criteria developed to promote healthy diets among children. This includes: China National Dietary Guidelines for School Children, EU Food and Nutrition Policy for Schools, USDA Nutrition Standards in the National School Lunch and School Breakfast programs, other guidelines provided by national governmental agencies or regulators that contain daily nutritional value for children and are substantially equivalent to the guidelines referenced above</p> <p>Meal option is define as an entree, side, and beverage for limtied service restaurants and an entree and beverage for sull service restaurants. The entity shall use menu items that are commonly paired together by customers, advertised together as combination, or are palced together as a specially promoted combination to determine possible meal combinations. For restaurants where choices are generally a la carte, the entity shall use a consistent approach for calculating meal options using menu items generally paired together as meals. The entity shall use the nutritional content for the standard menu items that are served to the customer by default, without a request for item or ingredient substitution or additions, to calculate nutrient content of a meal option. The percentage is calculated as the number of possible combinations of meal options that aare consistent with 1/3 the daily nutritional values in teh applicable national dietary guidelines divided by the total number of possible combinations of meal options offered by the entity.</p> <p>The entity shall disclose its revenue from the combination of meal options that are consistent with teh applicable national dietary guidelines.</p> <p>The scope of disclosure shall include both company-owned and franchise locations</p> <p>If meal options in a portion of an entity's operations are not tracked in such a manner taht allow for precise measurement, estimation isaccettable. If so, the entity shall disclose the estimation methodology used to calculate the sales of combinations of meal options, and teh percentage of operations for which it was employed.</p> | SASB      | 3           | 1           | 2         | 3        | 3          | 1             |
| 93        | revenue of products labeled and/or marketed to promote health and nutrition                                                    | products that are labeled to promote health and nutrition attribute contain levels and other written, printed, or graphic matter on the article itself, on any containers or wrappers, or otherwise accompanying the article that promote health and nutrition attributes. Consistent                                                                                                                                                                                                                                                                                                                                                                                                                                                                                                                                                                                                                                                                                                                                                                                                                                                                                                                                                                                                                                                                                                                                                                                                                                                                                                                                                                                                                                                                                                                                                                                                                                                                                                                                                                                                                                                                                                                                                                                                                                                                                                        | SASB      | 1           | 2           | 1         | 3        | 3          | 2             |

| metric ID | Metric                                                                                                                                                                                                                                                                                                                                                    | Details for Metric use   Scoring Criteria                                                                                                                                                                                                                                                                                                                                                                                                                                                                                                                                                                                                                                                                                                                                                                                                                                                                                                                                                                                                                                                                    | Framework | Materiality | Objectivity | Alignment | Activity | Resolution | Verifiability |
|-----------|-----------------------------------------------------------------------------------------------------------------------------------------------------------------------------------------------------------------------------------------------------------------------------------------------------------------------------------------------------------|--------------------------------------------------------------------------------------------------------------------------------------------------------------------------------------------------------------------------------------------------------------------------------------------------------------------------------------------------------------------------------------------------------------------------------------------------------------------------------------------------------------------------------------------------------------------------------------------------------------------------------------------------------------------------------------------------------------------------------------------------------------------------------------------------------------------------------------------------------------------------------------------------------------------------------------------------------------------------------------------------------------------------------------------------------------------------------------------------------------|-----------|-------------|-------------|-----------|----------|------------|---------------|
|           |                                                                                                                                                                                                                                                                                                                                                           | with the AMA's definition of marketing, products are considered to be marketed to promote health and nutrition attributes when the entity communicates, delivers, and exchanges offerings that promote the product's health and nutrition attributes.<br>The scope of products labeled and/or marketed to promote health and nutrition attributes includes products that contain one or more of the following labels and/or marketing claims: additives (e.g. artificial sweeteners, colors, preservatives and industrially produced trans fats) have been eliminated; fat, saturated fat, sodium, and cholesterol are equal to or less than the requirements for the use of the term "healthy" and related terms in the Guidance for Industry: A Food Labeling Guide prescribed by the US FDA; beneficial nutrients (e.g., vitamins A and C, calcium, iron, protein and fiber) meet or exceed the requirements for the term healthy consistent with FDA guidance; a relative claim (such as light, reduced, or less) can be made regarding products added sugar content, consistent with the FDA's guidance |           |             |             |           |          |            |               |
| 94        | revenue of products labeled as containing GMOs and non-GMOs                                                                                                                                                                                                                                                                                               | GMOs are defined as organisms, with the exception of human beings, in which the genetic material has been altered in a way that does not occur naturally by mating and/or natural recombination, consistent with EU Directive 2001/18/EC. The entity may disclose the revenue from its products that are labeled as (1) containing GMOs and (2) non-GMOs in markets subject to GMO labeling regulation<br>For the purposes of this disclosure, products that are third-party certified to standards for which non-GMO is inherent to the certificate (e.g. USDA Organic certificate) shall be considered to be labeled as non-GMO                                                                                                                                                                                                                                                                                                                                                                                                                                                                            | SASB      | 1           | 3           | 1         | 3        | 3          | 2             |
| 95        | The company demonstrates that it is improving the nutritional quality of products/menus by providing qualitative evidence on at least two of the following: a reduction of salt, sugar, fat, calories; an increase in fruits, vegetables, nuts, wholegrain; fortified foods, products that address other nutrient deficiencies (e.g. protein deficiency)  |                                                                                                                                                                                                                                                                                                                                                                                                                                                                                                                                                                                                                                                                                                                                                                                                                                                                                                                                                                                                                                                                                                              | WBA       | 2           | 1           | 1         | 3        | 2          | 2             |
| 96        | The company demonstrates that it is improving the nutritional quality of products/menus by providing quantitative evidence on at least two of the following: a reduction of salt, sugar, fat, calories; an increase in fruits, vegetables, nuts, wholegrain; fortified foods, products that address other nutrient deficiencies (e.g. protein deficiency) |                                                                                                                                                                                                                                                                                                                                                                                                                                                                                                                                                                                                                                                                                                                                                                                                                                                                                                                                                                                                                                                                                                              | WBA       | 2           | 2           | 1         | 3        | 3          | 2             |
| 97        | The company uses a nutrient profiling system (government-endorsed or evidence-based/peer-reviewed system in alignment with nutritional guidelines) to guide its product (re)formulation.                                                                                                                                                                  |                                                                                                                                                                                                                                                                                                                                                                                                                                                                                                                                                                                                                                                                                                                                                                                                                                                                                                                                                                                                                                                                                                              | WBA       | 2           | 2           | 1         | 2        | 1          | 2             |
| 98        | The company has a sales-based target to increase the percentage of products/menus with improved nutritional profile (in accordance with the company's nutrient                                                                                                                                                                                            |                                                                                                                                                                                                                                                                                                                                                                                                                                                                                                                                                                                                                                                                                                                                                                                                                                                                                                                                                                                                                                                                                                              | WBA       | 3           | 1           | 1         | 2        | 1          | 1             |

| metric ID                              | Metric                                                                                                                                                                                                                                  | Details for Metric use   Scoring Criteria                                                                                                                                                                                                                                                                                                                                                                                                                                                                                                                                                                                                                                                                                                                                                                                                                                                                                                                                                                                                                                                                                                                                                                                                                                                                                                                                                                                                                                            | Framework | Materiality | Objectivity | Alignment | Activity | Resolution | Verifiability |
|----------------------------------------|-----------------------------------------------------------------------------------------------------------------------------------------------------------------------------------------------------------------------------------------|--------------------------------------------------------------------------------------------------------------------------------------------------------------------------------------------------------------------------------------------------------------------------------------------------------------------------------------------------------------------------------------------------------------------------------------------------------------------------------------------------------------------------------------------------------------------------------------------------------------------------------------------------------------------------------------------------------------------------------------------------------------------------------------------------------------------------------------------------------------------------------------------------------------------------------------------------------------------------------------------------------------------------------------------------------------------------------------------------------------------------------------------------------------------------------------------------------------------------------------------------------------------------------------------------------------------------------------------------------------------------------------------------------------------------------------------------------------------------------------|-----------|-------------|-------------|-----------|----------|------------|---------------|
|                                        | profiling system) and reports progress against it.                                                                                                                                                                                      |                                                                                                                                                                                                                                                                                                                                                                                                                                                                                                                                                                                                                                                                                                                                                                                                                                                                                                                                                                                                                                                                                                                                                                                                                                                                                                                                                                                                                                                                                      |           |             |             |           |          |            |               |
| 99                                     | The company has a sales-based target to increase the percentage of nutritious products/menus in accordance with government-endorsed/widely recognised nutrient profiling system/nutritional guidelines and reports progress against it. |                                                                                                                                                                                                                                                                                                                                                                                                                                                                                                                                                                                                                                                                                                                                                                                                                                                                                                                                                                                                                                                                                                                                                                                                                                                                                                                                                                                                                                                                                      | WBA       | 3           | 2           | 1         | 2        | 1          | 1             |
| <b>Product Distribution and Equity</b> |                                                                                                                                                                                                                                         |                                                                                                                                                                                                                                                                                                                                                                                                                                                                                                                                                                                                                                                                                                                                                                                                                                                                                                                                                                                                                                                                                                                                                                                                                                                                                                                                                                                                                                                                                      |           |             |             |           |          |            |               |
| 100                                    | Has the company made a public commitment to address the affordability of its healthy products for the general consumer and for priority populations accounting for low-income groups in the last 3 years?                               | <p>Clear commitment made for whole business, with particular reference to low-income populations</p> <p>Clear commitment made for whole business, without particular reference to low-income populations</p> <p>Broad commitment with particular reference to low-income populations</p> <p>Broad commitment without particular reference to low-income populations</p> <p>No commitment</p> <p>No information</p> <p>Additional information: Clear commitment means a public statement in a policy or other document setting out how the company will ensure affordability, consider it when developing new products, in all key decisions re. placement, distribution etc. The commitment should specifically address the affordability of healthy products, e.g. relative to other products or referring specifically to products meeting the company's healthy criteria. A general commitment to address or improve the affordability of all products is not sufficient to be credited. The company's own definition of healthy products is considered relevant for this indicator, and throughout Criterion C1. Portion-limited products that do not otherwise meet healthy standards are not considered relevant as healthy products for this indicator and category overall (in general, products or product categories such as confectionery, sugary drinks or ice cream are not considered as healthy products unless there is a specific reason to make an exception).</p> | ATNI      | 3           | 2           | 1         | 1        | 1          | 3             |
| 101                                    | Has it committed to addressing in its commercial activities the affordability of healthy products designed to address micronutrient deficiencies in priority populations?                                                               | <p>Yes</p> <p>No</p> <p>No information</p> <p>Not applicable</p> <p>It is important to address the affordability of fortified or otherwise appropriate products, designed to address micronutrient deficiencies in priority populations, as these groups often have a low income and corresponding spending power.</p> <p>To indicate populations that are at (high) risk of or experiencing malnutrition in all its forms, including undernutrition, micronutrient deficiencies, obesity and diet-related diseases, ATNI uses the overarching term "priority populations". More specifically, ATNI defines priority populations as "those groups that are at (high) risk of or suffering from any form of malnutrition (including undernutrition or any other deficiency, excess or imbalance in a person's intake of energy and/or nutrients), and for which intervention may be reasonably considered to have a substantial impact at the population level.</p>                                                                                                                                                                                                                                                                                                                                                                                                                                                                                                                   | ATNI      | 2           | 2           | 1         | 1        | 1          | 3             |



| metric ID | Metric                                                                                                                                                                                               | Details for Metric use   Scoring Criteria                                                                                                                                                                                                                                                                                                                                                                                                                                                                                                                                                                                                                                                                                                                                                                                                                                                                                                                                                                                                                                                    | Framework | Materiality | Objectivity | Alignment | Activity | Resolution | Verifiability |
|-----------|------------------------------------------------------------------------------------------------------------------------------------------------------------------------------------------------------|----------------------------------------------------------------------------------------------------------------------------------------------------------------------------------------------------------------------------------------------------------------------------------------------------------------------------------------------------------------------------------------------------------------------------------------------------------------------------------------------------------------------------------------------------------------------------------------------------------------------------------------------------------------------------------------------------------------------------------------------------------------------------------------------------------------------------------------------------------------------------------------------------------------------------------------------------------------------------------------------------------------------------------------------------------------------------------------------|-----------|-------------|-------------|-----------|----------|------------|---------------|
|           |                                                                                                                                                                                                      | Under Category C, ATNI specifically observes the following determinants or factors to identify population groups suffering from or at risk of nutrition-related health inequities:<br><ul style="list-style-type: none"> <li>- Socioeconomic factors such as income, which in turn lead to an increased burden of nutrition-related illness or increased risk for adverse nutrition-related health outcome(s) such as micronutrient deficiencies; and</li> <li>- Geographical factors (i.e. remote access to supermarkets or food distribution centers), which are physical barriers in accessing nutrition.</li> </ul>                                                                                                                                                                                                                                                                                                                                                                                                                                                                      |           |             |             |           |          |            |               |
| 102       | Does the company have a clear strategy, and one or more quantitative targets, to specifically improve the affordability of healthy products?                                                         | Yes, it has defined a clear strategy OR one or more targets<br>No clear strategy and/or targets<br>No information<br><br>Specifically improving the affordability of healthy products may be done by explicitly focusing on products that meet the company's healthy standard (related to nutrition criteria in its NPS), or by addressing affordability of healthy products relative to products not meeting healthy standards.<br><br>Targets considered for scoring regarding healthy products may include examples such as:<br><ul style="list-style-type: none"> <li>- Number of consumers to reach with affordably priced healthy products by set date</li> <li>- Number of units or sales value target for affordably priced healthy products by set date</li> <li>- Achieve a particular price point for healthy products</li> <li>- Narrow the price differential on healthy vs. less healthy products</li> <li>- Targets set with particular reference to low-income groups</li> </ul>                                                                                             | ATNI      | 3           | 2           | 1         | 2        | 1          | 2             |
| 103       | Does the company have a clear strategy, and one or more quantitative targets, to improve the affordability of healthy products aiming to address micronutrient deficiencies in priority populations? | Yes, it has defined a clear strategy AND one or more targets<br>Yes, it has defined a clear strategy OR one or more targets<br>No clear strategy and/or targets<br>No information<br>Not applicable<br><br>Additional information: Targets considered for scoring regarding products addressing micronutrient deficiencies may include these examples:<br><ul style="list-style-type: none"> <li>- Number of consumers to reach with affordably priced healthy products aiming to address micronutrient deficiencies by set date</li> <li>- Number of units or sales value target for affordably priced healthy products aiming to address micronutrient deficiencies by set date</li> <li>- Achieve a particular price point for healthy products aiming to address micronutrient deficiencies</li> <li>- Narrow the price differential on fortified vs non-fortified products</li> <li>- Targets set with particular reference to low-income groups, which may include providing smaller packages of healthy fortified foods to lower the price point of single purchase units.</li> </ul> | ATNI      | 2           | 2           | 1         | 2        | 1          | 2             |
| 104       | Has the company done a comprehensive analysis on appropriate pricing of products that meet its healthy standard for the general                                                                      | Yes, with specific attention to low-income groups<br>Yes, without specific attention to low-income groups<br>No analysis on appropriate pricing has been conducted<br>No information                                                                                                                                                                                                                                                                                                                                                                                                                                                                                                                                                                                                                                                                                                                                                                                                                                                                                                         | ATNI      | 2           | 2           | 1         | 2        | 1          | 2             |

| metric ID | Metric                                                                                                                                                                                           | Details for Metric use   Scoring Criteria                                                                                                                                                                                                                                                                                                                                                                                                                                                                                                                                                                                                                                                                                                                                                                                                                                                                                                                                                                                                                                                                                                                                                                                                                                                                                                                                                                                                                                                                                                                                                                                                                                                                                                             | Framework | Materiality | Objectivity | Alignment | Activity | Resolution | Verifiability |
|-----------|--------------------------------------------------------------------------------------------------------------------------------------------------------------------------------------------------|-------------------------------------------------------------------------------------------------------------------------------------------------------------------------------------------------------------------------------------------------------------------------------------------------------------------------------------------------------------------------------------------------------------------------------------------------------------------------------------------------------------------------------------------------------------------------------------------------------------------------------------------------------------------------------------------------------------------------------------------------------------------------------------------------------------------------------------------------------------------------------------------------------------------------------------------------------------------------------------------------------------------------------------------------------------------------------------------------------------------------------------------------------------------------------------------------------------------------------------------------------------------------------------------------------------------------------------------------------------------------------------------------------------------------------------------------------------------------------------------------------------------------------------------------------------------------------------------------------------------------------------------------------------------------------------------------------------------------------------------------------|-----------|-------------|-------------|-----------|----------|------------|---------------|
|           | consumer and for priority populations (i.e. low-income groups) in the last 3 years?                                                                                                              | The pricing analysis should specifically address healthy products, e.g. relative to other products. A general analysis of pricing of all products is not sufficient to be credited. Portion-limited products that do not otherwise meet healthy standards are not considered relevant for this indicator and category overall.                                                                                                                                                                                                                                                                                                                                                                                                                                                                                                                                                                                                                                                                                                                                                                                                                                                                                                                                                                                                                                                                                                                                                                                                                                                                                                                                                                                                                        |           |             |             |           |          |            |               |
| 105       | Does the company provide evidence that it has specifically offered discounts, price promotions or coupons on its healthy products?                                                               | <p>Yes, with specific attention to low-income groups</p> <p>Yes, without specific attention to low-income groups</p> <p>No evidence provided</p> <p>No information</p> <p>Specifically offering discounts, price promotions or coupons on its healthy products may be done by explicitly focusing on products that meet the company's healthy standard (related to nutrition criteria in its NPS), or by addressing affordability of healthy products relative to products not meeting healthy standards.</p>                                                                                                                                                                                                                                                                                                                                                                                                                                                                                                                                                                                                                                                                                                                                                                                                                                                                                                                                                                                                                                                                                                                                                                                                                                         | ATNI      | 2           | 2           | 1         | 3        | 1          | 2             |
| 106       | Does the company provide evidence or examples of improving affordability of healthy products that address micronutrient deficiencies in priority populations?                                    | <p>Yes</p> <p>No evidence provided</p> <p>No information</p> <p>Not applicable</p> <p>Please specify the strategy used to make healthy products that address micronutrient deficiencies more affordable, e.g. reduced/set pricing of these products, reduced package sizes, etc.</p> <p>Note: information regarding fortified products not meeting the company's healthy standard will not be considered under this indicator.</p>                                                                                                                                                                                                                                                                                                                                                                                                                                                                                                                                                                                                                                                                                                                                                                                                                                                                                                                                                                                                                                                                                                                                                                                                                                                                                                                    | ATNI      | 2           | 2           | 1         | 2        | 1          | 2             |
| 107       | Has the company made a public commitment to address the physical accessibility of its healthy products for the general consumer and for priority populations accounting for geographical access? | <p>Clear commitment made for whole business, with particular reference to populations with limited access to nutritious food (i.e. living in food deserts)</p> <p>Clear commitment made for whole business without particular reference to populations with limited access to nutritious food (i.e. living in food deserts)</p> <p>Broad commitment with particular reference to populations with limited access to nutritious food (i.e. living in food deserts)</p> <p>Broad commitment without particular reference to populations with limited access to nutritious food (i.e. living in food deserts)</p> <p>No commitment</p> <p>No information</p> <p>Additional information: Clear commitment means a formal, public statement in a policy or other document setting out how the company will ensure physical accessibility, consider it when developing new products, in all key decisions re. placement, distribution etc. The commitment should specifically address the physical accessibility of healthy products, e.g. relative to other products or referring specifically to products meeting the company's healthy criteria. A general commitment to address or improve the accessibility of all products is not sufficient to be credited. The company's own definition of healthy products is considered relevant for this indicator, and throughout Criterion C2. Portion-limited products that do not otherwise meet healthy standards are not considered relevant as healthy products for this indicator and category overall (in general, products or product categories such as confectionery, sugary drinks or ice cream are not considered as healthy products unless there is a specific reason to make an exception).</p> | ATNI      | 3           | 2           | 1         | 1        | 1          | 3             |

| metric ID | Metric                                                                                                                                                                             | Details for Metric use   Scoring Criteria                                                                                                                                                                                                                                                                                                                                                                                                                                                                                                                                                                                                                                                                                                                                                                                                                                                                                                                                                                                                                                                                                                                                                                                                                                                                                                                                                                                                                                                                            | Framework | Materiality | Objectivity | Alignment | Activity | Resolution | Verifiability |
|-----------|------------------------------------------------------------------------------------------------------------------------------------------------------------------------------------|----------------------------------------------------------------------------------------------------------------------------------------------------------------------------------------------------------------------------------------------------------------------------------------------------------------------------------------------------------------------------------------------------------------------------------------------------------------------------------------------------------------------------------------------------------------------------------------------------------------------------------------------------------------------------------------------------------------------------------------------------------------------------------------------------------------------------------------------------------------------------------------------------------------------------------------------------------------------------------------------------------------------------------------------------------------------------------------------------------------------------------------------------------------------------------------------------------------------------------------------------------------------------------------------------------------------------------------------------------------------------------------------------------------------------------------------------------------------------------------------------------------------|-----------|-------------|-------------|-----------|----------|------------|---------------|
|           |                                                                                                                                                                                    | Note: A food desert is an area (either an urban or suburban area, or an isolated rural area) which offers limited access to affordable and nutritious food (especially fresh produce). Usually food deserts are populated by low purchasing-power groups with limited mobility, which makes them less attractive consumers to large supermarkets. Therefore, available food options are often limited to processed foods high in sugar, fat and salt, which if not consumed in moderation can contribute to obesity and diet-related diseases.                                                                                                                                                                                                                                                                                                                                                                                                                                                                                                                                                                                                                                                                                                                                                                                                                                                                                                                                                                       |           |             |             |           |          |            |               |
| 108       | Has it committed to addressing in its commercial activities the physical accessibility of healthy products designed to address micronutrient deficiencies in priority populations? | <p>Yes<br/>No<br/>No information<br/>Not applicable</p> <p>It is important to address the physical accessibility of fortified or otherwise appropriate products, designed to address micronutrient deficiencies in priority populations.</p> <p>To indicate populations that are at (high) risk of or experiencing malnutrition in all its forms, including undernutrition, micronutrient deficiencies, obesity and diet-related diseases, ATNI uses the overarching term “priority populations”. More specifically, ATNI defines priority populations as “those groups that are at (high) risk of or suffering from any form of malnutrition (including undernutrition or any other deficiency, excess or imbalance in a person’s intake of energy and/or nutrients), and for which intervention may be reasonably considered to have a substantial impact at the population level.</p> <p>Under Category C, ATNI specifically observes the following determinants or factors to identify population groups suffering from or at risk of nutrition-related health inequities:</p> <ul style="list-style-type: none"> <li>- Socioeconomic factors such as income, which in turn lead to an increased burden of nutrition-related illness or increased risk for adverse nutrition-related health outcome(s) such as micronutrient deficiencies; and</li> <li>- Geographical factors (i.e. remote access to supermarkets or food distribution centers), which are physical barriers in accessing nutrition.</li> </ul> | ATNI      | 2           | 2           | 1         | 1        | 1          | 3             |
| 109       | Does the company have a clear strategy, and one or more quantitative targets, to specifically improve the physical accessibility of healthy products?                              | <p>Yes, it has defined a clear strategy AND one or more targets<br/>Yes, it has defined a clear strategy OR one or more targets<br/>No clear strategy and/or targets<br/>No information</p> <p>Specifically improving the physical accessibility of healthy products may be done by explicitly focusing on products that meet the company’s healthy standard (related to nutrition criteria in its NPS), or by addressing the physical accessibility of healthy products relative to products not meeting healthy standards.</p> <p>Targets considered for scoring regarding healthy products may include examples such as:</p> <ul style="list-style-type: none"> <li>- Number of new consumers of healthy products to reach through improved distribution</li> <li>- Number of priority populations with limited access to nutritious food to reach with healthy and appropriate products through improved distribution</li> <li>- Number of units or sales value targets for healthy products related to extended distribution</li> <li>- Number of new retail partners to achieve extended accessibility goals</li> </ul>                                                                                                                                                                                                                                                                                                                                                                                        | ATNI      | 3           | 2           | 1         | 2        | 1          | 2             |

| metric ID | Metric                                                                                                                                                                                                               | Details for Metric use   Scoring Criteria                                                                                                                                                                                                                                                                                                                                                                                                                                                                                                                                                                                                                                                                                                                                                                                                                                                                                                                                                                                                                                                                                                                                                                                                                        | Framework | Materiality | Objectivity | Alignment | Activity | Resolution | Verifiability |
|-----------|----------------------------------------------------------------------------------------------------------------------------------------------------------------------------------------------------------------------|------------------------------------------------------------------------------------------------------------------------------------------------------------------------------------------------------------------------------------------------------------------------------------------------------------------------------------------------------------------------------------------------------------------------------------------------------------------------------------------------------------------------------------------------------------------------------------------------------------------------------------------------------------------------------------------------------------------------------------------------------------------------------------------------------------------------------------------------------------------------------------------------------------------------------------------------------------------------------------------------------------------------------------------------------------------------------------------------------------------------------------------------------------------------------------------------------------------------------------------------------------------|-----------|-------------|-------------|-----------|----------|------------|---------------|
|           |                                                                                                                                                                                                                      | <ul style="list-style-type: none"> <li>- Number of consumers to reach with healthy products through improved distribution in 'food deserts'</li> <li>- Investment plans on improving accessibility of healthy products</li> </ul>                                                                                                                                                                                                                                                                                                                                                                                                                                                                                                                                                                                                                                                                                                                                                                                                                                                                                                                                                                                                                                |           |             |             |           |          |            |               |
| 110       | 2.2. Does the company have a clear strategy, and one or more quantitative targets, to improve the physical accessibility of healthy products designed to address micronutrient deficiencies in priority populations? | <p>Yes, it has a defined clear strategy AND one or more targets<br/>           Yes, it has defined a clear strategy OR one or more targets<br/>           No clear strategy and/or targets<br/>           No information<br/>           Not applicable</p> <p>Targets considered for scoring regarding products addressing micronutrient deficiencies may include:</p> <ul style="list-style-type: none"> <li>- Number of new consumers to reach through improved distribution of healthy products aiming to address micronutrient deficiencies</li> <li>- Number of groups experiencing or at high-risk of malnutrition to reach with healthy products aiming to address micronutrient deficiencies through improved distribution</li> <li>- Number of units or sales value targets for healthy products aiming to address micronutrient deficiencies with extended distribution</li> <li>- Number of new retail partners to achieve extended accessibility goals</li> <li>- Number of consumers to reach with healthy products aiming to address micronutrient deficiencies through improved distribution in 'food deserts'</li> <li>- Investment plans on improving accessibility of healthy products aiming to address micronutrient deficiencies</li> </ul> | ATNI      | 2           | 2           | 1         | 2        | 1          | 2             |
| 111       | Has the company conducted analysis on how to improve the physical accessibility of healthy products for the general consumer and for priority populations accounting for geographical access?                        | <p>Yes, with specific attention to populations with limited access to nutritious food (i.e. living in food deserts)<br/>           Yes, without specific attention to populations with limited access to nutritious food (i.e. living in food deserts)<br/>           No analysis on physical accessibility has been conducted<br/>           No information</p> <p>Additional information: This indicator assesses whether areas that lack access to healthy products (i.e. food deserts) are covered in the company's accessibility strategy related to healthy products.</p> <p>Examples that can be considered for scoring include:</p> <ul style="list-style-type: none"> <li>- Arrangements/incentives with retailers for prominent shelf positions for its healthy products on a regular basis (not a one-off)</li> <li>- Arrangements/incentives with distributors re. how healthy products are distributed</li> <li>- Data to demonstrate that rural retailers are provided with healthy options as standard</li> <li>- Data to demonstrate that retailers in poor urban areas are provided with healthy options as standard</li> <li>- Other examples</li> </ul>                                                                                       | ATNI      | 2           | 2           | 1         | 2        | 1          | 2             |
| 112       | Does the company provide evidence of specifically improving the physical accessibility of its healthy products?                                                                                                      | <p>Yes, with specific attention to populations with limited access to nutritious food (i.e. living in food deserts)<br/>           Yes, without specific attention to populations with limited access to nutritious food (i.e. living in food deserts)<br/>           No evidence of physical accessibility has been provided<br/>           No information</p>                                                                                                                                                                                                                                                                                                                                                                                                                                                                                                                                                                                                                                                                                                                                                                                                                                                                                                  | ATNI      | 2           | 2           | 1         | 3        | 1          | 2             |

| metric ID | Metric                                                                                                                                                                                                                         | Details for Metric use   Scoring Criteria                                                                                                                                                                                                                                                                                                                                                                                                                                                                                                                                                                                                                                                                                                                                                                                                                                                                                                                 | Framework | Materiality | Objectivity | Alignment | Activity | Resolution | Verifiability |
|-----------|--------------------------------------------------------------------------------------------------------------------------------------------------------------------------------------------------------------------------------|-----------------------------------------------------------------------------------------------------------------------------------------------------------------------------------------------------------------------------------------------------------------------------------------------------------------------------------------------------------------------------------------------------------------------------------------------------------------------------------------------------------------------------------------------------------------------------------------------------------------------------------------------------------------------------------------------------------------------------------------------------------------------------------------------------------------------------------------------------------------------------------------------------------------------------------------------------------|-----------|-------------|-------------|-----------|----------|------------|---------------|
|           |                                                                                                                                                                                                                                | <p>Not applicable</p> <p>Specifically improving the physical accessibility of its healthy products may be done by explicitly focusing on products that meet the company's healthy standard (related to nutrition criteria in its NPS), or by addressing the physical accessibility of healthy products relative to products not meeting healthy standards.</p> <p>Examples that can be considered for scoring include:</p> <ul style="list-style-type: none"> <li>- Arrangements/incentives with retailers for prominent shelf positions for its healthy products on a regular basis (not a one-off)</li> <li>- Arrangements/incentives with distributors re. how healthy products are distributed</li> <li>- Data to demonstrate that rural retailers are provided with healthy options as standard</li> <li>- Data to demonstrate that retailers in poor urban areas are provided with healthy options as standard</li> <li>- Other examples</li> </ul> |           |             |             |           |          |            |               |
| 113       | 5.1. Does the company provide evidence or examples of improving physical accessibility of healthy products that address undernutrition and micronutrient deficiencies through commercial activities?                           | <p>Yes<br/>No<br/>No information<br/>Not applicable</p> <p>Additional information:<br/>Examples that can be considered for scoring include:</p> <ul style="list-style-type: none"> <li>- Arrangements/incentives with retailers for prominent shelf positions for its healthy products on a regular basis (not a one-off)</li> <li>- Arrangements/incentives with distributors re. how healthy products are distributed</li> <li>- Data to demonstrate that rural retailers are provided with healthy options as standard</li> <li>- Data to demonstrate that retailers in poor urban areas are provided with healthy options as standard</li> <li>- Other examples</li> </ul> <p>Note: information regarding fortified products not meeting the company's healthy standard will not be considered under this indicator.</p>                                                                                                                              | ATNI      | 2           | 2           | 1         | 3        | 1          | 2             |
| 114       | Does the company provide evidence or examples of improving the physical accessibility of healthy products that address undernutrition and micronutrient deficiencies, through non-commercial activities? (Tick all that apply) | <p>Yes, providing products to be distributed to undernourished groups<br/>Yes, providing products to school feeding programs<br/>Yes, by using its distribution systems to deliver micronutrient powders, supplements, etc.<br/>Yes, by otherwise supporting programs designed to address undernutrition to reach target groups with appropriate products<br/>Not applicable</p> <p>Non-commercial or philanthropic activities include product donations or providing other types of contributions on a philanthropic basis. Product sales, including at reduced prices or related to governmental programs, should be assessed as commercial activities in indicator 5.1.</p> <p>Note: information regarding fortified products not meeting the company's healthy standard will not be considered under this indicator.</p>                                                                                                                              | ATNI      | 1           | 2           | 1         | 3        | 1          | 2             |

| metric ID | Metric                                                                                                                                                                                | Details for Metric use   Scoring Criteria                                                                                                                                                                                                                                                                                                                                                                                                                                                                                                                                                                                                                                                                                                                                                                                                                                                                                                                                                                                                                                                                                                                                        | Framework | Materiality | Objectivity | Alignment | Activity | Resolution | Verifiability |
|-----------|---------------------------------------------------------------------------------------------------------------------------------------------------------------------------------------|----------------------------------------------------------------------------------------------------------------------------------------------------------------------------------------------------------------------------------------------------------------------------------------------------------------------------------------------------------------------------------------------------------------------------------------------------------------------------------------------------------------------------------------------------------------------------------------------------------------------------------------------------------------------------------------------------------------------------------------------------------------------------------------------------------------------------------------------------------------------------------------------------------------------------------------------------------------------------------------------------------------------------------------------------------------------------------------------------------------------------------------------------------------------------------|-----------|-------------|-------------|-----------|----------|------------|---------------|
| 115       | Has the company made a commitment to address the affordability of its healthy products for the general consumer and specifically for low-income groups?                               | <p>Specific commitment made with particular reference to ensuring affordability for low-income populations</p> <p>Specific commitment made without particular reference to ensuring affordability for low-income populations</p> <p>General commitment about affordability without particular reference to ensuring affordability for low-income groups</p> <p>No strategy/no information found</p> <p>By committing to make a UK-wide 'healthy offering', a company can ensure accessibility and availability of affordable 'healthy' products in all four countries of the UK relative to other products not meeting healthy standards or specifically the products meeting the company's healthy criteria.</p> <p>For information only: ATNI understands that companies do differentiate their product ranges depending on socioeconomic characteristics of consumers and/or geographies. ATNI would welcome any insights companies are willing to share on the use of planograms to this purpose to better understand existing differences in healthy offerings.</p> <p>A specific commitment is understood as a commitment that can be measured through SMART elements.</p> | ATNI UK   | 3           | 2           | 1         | 1        | 1          | 3             |
| 116       | Has the company committed to a 'price promise' that healthy options will always be the same price or cheaper than less healthy products?                                              | <p>Yes, explicitly for all product categories</p> <p>Yes, but not explicitly for all product categories and/or only at certain times of year</p> <p>No/no information found</p>                                                                                                                                                                                                                                                                                                                                                                                                                                                                                                                                                                                                                                                                                                                                                                                                                                                                                                                                                                                                  | ATNI UK   | 3           | 2           | 1         | 1        | 1          | 3             |
| 117       | Has the company committed to using pricing and price-based promotions to drive sales of healthy products?                                                                             | <p>Yes, specifically to drive sales of fruits and vegetables (fresh, dried, tinned/canned and frozen) and/or wholegrain varieties of products and/or other healthy products</p> <p>Yes, to drive the sales of healthy products excluding fruit and vegetables</p> <p>No/no information found</p>                                                                                                                                                                                                                                                                                                                                                                                                                                                                                                                                                                                                                                                                                                                                                                                                                                                                                 | ATNI UK   | 2           | 2           | 1         | 1        | 1          | 3             |
| 118       | Has the company committed to stocking healthier variants for all products (as relevant to the retailer's range) for which there is such a variant?                                    | <p>Yes, and with as many facings as the original products</p> <p>Yes, without a commitment about the number of facings</p> <p>No/no information</p> <p>Healthier here indicates products variants such as, but not limited to, 'light' or 'low sugar' product variants.</p>                                                                                                                                                                                                                                                                                                                                                                                                                                                                                                                                                                                                                                                                                                                                                                                                                                                                                                      | ATNI UK   | 2           | 2           | 1         | 1        | 1          | 3             |
| 119       | Does the company state that it uses its standard reward/membership mechanisms to incentivise the sale of healthy products?                                                            | <p>Yes</p> <p>No/no information found</p> <p>Not applicable</p>                                                                                                                                                                                                                                                                                                                                                                                                                                                                                                                                                                                                                                                                                                                                                                                                                                                                                                                                                                                                                                                                                                                  | ATNI UK   | 2           | 2           | 1         | 2        | 1          | 3             |
| 120       | Does the company provide any evidence of addressing the affordability of its healthy products for the general consumer and for priority populations accounting for low-income groups? | <p>Yes, for all including priority populations accounting for low-income groups</p> <p>Yes, only for the general consumer</p> <p>No/no information found</p> <p>Strong evidence would include references to all regions in the UK including those areas where access and availability are of the highest concern (based on public data of areas with high prevalence of obesity and diet-related diseases).</p> <p>A specific reference to low-income groups is sought here.</p>                                                                                                                                                                                                                                                                                                                                                                                                                                                                                                                                                                                                                                                                                                 | ATNI UK   | 3           | 2           | 1         | 3        | 1          | 2             |
| 121       | Does the company provide evidence of having implemented its 'price promise' that healthy options will always be the same price or                                                     | <p>Yes</p> <p>No/no information found</p>                                                                                                                                                                                                                                                                                                                                                                                                                                                                                                                                                                                                                                                                                                                                                                                                                                                                                                                                                                                                                                                                                                                                        | ATNI UK   | 3           | 2           | 1         | 3        | 1          | 2             |

| metric ID | Metric                                                                                                                                                                                                             | Details for Metric use   Scoring Criteria                                                                                                                                                                                                                                                                                                                                                                                                                                                                        | Framework   | Materiality | Objectivity | Alignment | Activity | Resolution | Verifiability |
|-----------|--------------------------------------------------------------------------------------------------------------------------------------------------------------------------------------------------------------------|------------------------------------------------------------------------------------------------------------------------------------------------------------------------------------------------------------------------------------------------------------------------------------------------------------------------------------------------------------------------------------------------------------------------------------------------------------------------------------------------------------------|-------------|-------------|-------------|-----------|----------|------------|---------------|
|           | cheaper than less healthy products for its own brands?                                                                                                                                                             |                                                                                                                                                                                                                                                                                                                                                                                                                                                                                                                  |             |             |             |           |          |            |               |
| 122       | Does the company provide any evidence of having successfully used pricing and price promotions to drive sales of healthy products?                                                                                 | Yes<br>No/no information found                                                                                                                                                                                                                                                                                                                                                                                                                                                                                   | ATNI UK     | 2           | 2           | 1         | 3        | 1          | 2             |
| 123       | Is there evidence that the company has done the following [related to price-based promotions] on packaged food?                                                                                                    | Discontinued price-based promotions on less healthy products?<br>Reduced price-based promotions on less healthy products?<br>Increased price-based promotions on healthy products?<br>No/no information found                                                                                                                                                                                                                                                                                                    | ATNI UK     | 2           | 2           | 1         | 3        | 1          | 2             |
| 124       | Is there evidence that the company has done the following [price related interventions] on fruit and veg?                                                                                                          | Discounting 'wonky' or near expired fruit or vegetables<br>Free fruit or vegetables for children in-store<br>Fun packaged fruit, veg or wholegrains for children<br>More fruit, veg and wholegrains in meal deals<br>Minimum number of fruit and veg and wholegrains promotions<br>Other<br>None/no information found<br><br>Tick all options that apply with a maximum of 20 points being possible to achieve.                                                                                                  | ATNI UK     | 2           | 2           | 1         | 3        | 1          | 2             |
| 125       | Is there evidence that the company has done the following [price related interventions] on packaged food?                                                                                                          | Discontinued volume-based promotions for less healthy products?<br>Reduced volume-based promotions for less healthy products?<br>Increase volume-based promotions for healthy products?<br>No/no information found<br>Not applicable<br>Evidence of ceasing such activity in respect of adults and children<br>Evidence of ceasing such activity in respect of children only<br>No/no information found<br><br>Tick all that apply. Tick either option 1 or 2, not both                                          | ATNI UK     | 2           | 2           | 1         | 3        | 1          | 2             |
| 126       | Does the company provide any evidence of driving healthier purchases through its reward/membership mechanisms?                                                                                                     | Yes<br>No/no information found<br>Not applicable                                                                                                                                                                                                                                                                                                                                                                                                                                                                 | ATNI UK     | 2           | 2           | 1         | 3        | 1          | 2             |
| 127       | Does the company make a commitment to address the price / affordability of its healthier products relative to its unhealthy products? (if applicable, i.e. if company has both 'healthy' and 'unhealthy' products) | 10: Clear and specific targets for whole business, published and applied nationally<br>7.5: Clear and specific targets for whole business, not published and applied nationally<br>5: Broad commitment, published and applied nationally<br>2.5: Broad commitment, not published<br>0: No commitment/ no information available to the research team                                                                                                                                                              | BIA-Obesity | 3           | 2           | 1         | 1        | 1          | 2             |
| 128       | Does the company make a clear and specific commitment to increase the availability of healthy and/or decrease the availability of unhealthy products?                                                              | 10: Yes, published and clear commitment for whole of business or over a range of key settings (including remote communities, schools, hospitals and community events)<br>5: Yes, not published or clear commitment for some specific settings (e.g. schools, remote communities, community events or hospitals)<br>2.5: Some commitment applicable to some specific settings (e.g. schools, remote communities, hospitals, community events)<br>0: No commitment / no information available to the research team | BIA-Obesity | 3           | 2           | 1         | 1        | 1          | 2             |
| 129       | What system / criteria (e.g., product classification system or nutrient profiling                                                                                                                                  | 10: Adopted official national or regional classification system (developed by WHO, PAHO, national government, etc.)                                                                                                                                                                                                                                                                                                                                                                                              | BIA-Obesity | 1           | 3           | 2         | 2        | 1          | 2             |

| metric ID | Metric                                                                                                                                                                                                                                                                                                                                                                                                                                                                                                                                                                                                                                                                                                                                                           | Details for Metric use   Scoring Criteria                                                                                                                                                                                                                                                                                                                                                                                                                              | Framework   | Materiality | Objectivity | Alignment | Activity | Resolution | Verifiability |
|-----------|------------------------------------------------------------------------------------------------------------------------------------------------------------------------------------------------------------------------------------------------------------------------------------------------------------------------------------------------------------------------------------------------------------------------------------------------------------------------------------------------------------------------------------------------------------------------------------------------------------------------------------------------------------------------------------------------------------------------------------------------------------------|------------------------------------------------------------------------------------------------------------------------------------------------------------------------------------------------------------------------------------------------------------------------------------------------------------------------------------------------------------------------------------------------------------------------------------------------------------------------|-------------|-------------|-------------|-----------|----------|------------|---------------|
|           | system) does the company use to classify the healthiness of products for the purposes of food pricing, distribution and/or availability? If a proprietary NPS, detail which products, nutrients and food characteristics are covered                                                                                                                                                                                                                                                                                                                                                                                                                                                                                                                             | 5: Developed own system that has been validated and shows strong alignment with official national (or regional) classification systems / dietary guidelines, published in peer-reviewed literature<br>2.5: Developed own system that has been validated and shows alignment with official national (or regional) classification systems / dietary guidelines, not published in peer-reviewed literature<br>0: No information / poor alignment / does not have a system |             |             |             |           |          |            |               |
| 130       | Does the company publish its policy position (in relation to government policy, where government policy exists) on fiscal policies to make healthier foods relatively cheaper and unhealthy foods relatively more expensive?                                                                                                                                                                                                                                                                                                                                                                                                                                                                                                                                     | 10: Yes, on own website<br>5: Yes, on industry association website<br>0: Not publicly available                                                                                                                                                                                                                                                                                                                                                                        | BIA-Obesity | 3           | 2           | 1         | 1        | 1          | 3             |
| 131       | Does the company's policy position support WHO's position on fiscal policies to make healthier foods relatively cheaper and unhealthy foods relatively more expensive, as articulated in the WHO Global Action Plan for NCDs and the Report of the Commission on Ending Childhood Obesity, Recommendation 1.2)?<br>(ECHO Statement on Recommendation 1.2: Implement an effective tax on sugar-sweetened beverages.)<br>(Global Action Plan: consider economic tools that are justified by evidence, and may include taxes and subsidies, that create incentives for behaviours associated with improved health outcomes, improve the affordability and encourage consumption of healthier food products and discourage the consumption of less healthy options.) | 10: Strong support (e.g., includes support for taxes on unhealthy foods, broadly defined, as well as subsidies for healthy foods)<br>5: Weak support (e.g., includes support for taxes on unhealthy foods, narrowly defined, or subsidies for healthy foods)<br>0: No details available<br>-10: Strongly opposed (e.g., opposes soft drinks tax or unhealthy foods tax OR both taxes)                                                                                  | BIA-Obesity | 3           | 2           | 3         | 1        | 1          | 3             |
| 132       | Does the company make a commitment to address the price / affordability of its healthy products relative to its unhealthy products?                                                                                                                                                                                                                                                                                                                                                                                                                                                                                                                                                                                                                              | 10: Clear and specific targets for whole business, published and applied nationally<br>7.5: Clear and specific targets for whole business, not published and applied nationally<br>5: Broad commitment, published and applied nationally<br>2.5: Broad commitment, not published<br>0: No commitment/ no information available to the research team                                                                                                                    | BIA-Obesity | 3           | 2           | 1         | 1        | 1          | 2             |
| 133       | Does the company have a policy that price promotions are used only on healthy products?<br>(ONLY IF APPLICABLE)                                                                                                                                                                                                                                                                                                                                                                                                                                                                                                                                                                                                                                                  | 10: Policy that all price promotions are for healthy products<br>5: Policy that factors the healthiness of products into price promotion decisions<br>2.5: No specific policy in the area, but 'meal deals' include the option of healthy sides and drinks<br>0: No policy / no information available to the research team                                                                                                                                             | BIA-Obesity | 2           | 2           | 1         | 2        | 1          | 2             |
| 134       | Does the company explicitly commit to not use price incentives (such as 'supersizing') that incentivise consumers to purchase larger portion sizes for minimal extra cost?                                                                                                                                                                                                                                                                                                                                                                                                                                                                                                                                                                                       | 5: Yes<br>0: No explicit commitment / no policy information available to the research team                                                                                                                                                                                                                                                                                                                                                                             | BIA-Obesity | 2           | 3           | 1         | 1        | 1          | 3             |



| metric ID | Metric                                                                                                                                                                                                                                                                                                                                                                                                                                                                                                                                                                                                                                                                                                                                                                                      | Details for Metric use   Scoring Criteria                                                                                                                                                                                                                                                                                                                                                                                                                                                                                                                                                     | Framework   | Materiality | Objectivity | Alignment | Activity | Resolution | Verifiability |
|-----------|---------------------------------------------------------------------------------------------------------------------------------------------------------------------------------------------------------------------------------------------------------------------------------------------------------------------------------------------------------------------------------------------------------------------------------------------------------------------------------------------------------------------------------------------------------------------------------------------------------------------------------------------------------------------------------------------------------------------------------------------------------------------------------------------|-----------------------------------------------------------------------------------------------------------------------------------------------------------------------------------------------------------------------------------------------------------------------------------------------------------------------------------------------------------------------------------------------------------------------------------------------------------------------------------------------------------------------------------------------------------------------------------------------|-------------|-------------|-------------|-----------|----------|------------|---------------|
| 135       | Does the company commit to not opening new stores near schools?                                                                                                                                                                                                                                                                                                                                                                                                                                                                                                                                                                                                                                                                                                                             | (Can be multiple)<br>5: Commits to not opening a new location near (e.g., within 500m) of primary schools, published (2.5 if not published)<br>5: Commits to not opening a new location near (e.g., within 500m) of secondary schools, published (2.5 if not published)                                                                                                                                                                                                                                                                                                                       | BIA-Obesity | 1           | 3           | 1         | 1        | 1          | 2             |
| 136       | What system / criteria (e.g., product classification system or nutrient profiling system) does the company use to classify the healthiness of products for the purposes of product pricing, availability and selection? If a proprietary NPS, detail which products, nutrients and food characteristics are covered                                                                                                                                                                                                                                                                                                                                                                                                                                                                         | 10: Adopted official national or regional classification system (developed by WHO, PAHO, national government, etc.)<br>5: Developed own system that has been validated and shows strong alignment with official national (or regional) classification systems / dietary guidelines, published in peer-reviewed literature<br>2.5: Developed own system that has been validated and shows alignment with official national (or regional) classification systems / dietary guidelines, not published in peer-reviewed literature<br>0: No information / poor alignment / does not have a system | BIA-Obesity | 2           | 3           | 2         | 2        | 2          | 2             |
| 137       | Does the company's policy position support WHO's position on fiscal policies to make healthier foods relatively cheaper and unhealthy foods relatively more expensive, as articulated in the WHO Global Action Plan for NCDs and other key WHO documents (such as the Report of the Commission on Ending Childhood Obesity, Recommendation 1.2)? (ECHO Statement on Recommendation 1.2: Implement an effective tax on sugar-sweetened beverages.) (Global Action Plan: consider economic tools that are justified by evidence, and may include taxes and subsidies, that create incentives for behaviours associated with improved health outcomes, improve the affordability and encourage consumption of healthier food products and discourage the consumption of less healthy options.) | 10: Strong support (e.g., includes support for taxes on unhealthy foods, broadly defined, as well as subsidies for healthy foods)<br>5: Weak support (e.g., includes support for taxes on unhealthy foods, narrowly defined, or subsidies for healthy foods)<br>0: No details available<br>-5: Somewhat opposed (e.g., opposes taxes on unhealthy foods or subsidies for healthy foods)<br>-10: Strongly opposed (e.g., opposes all measures in this area)                                                                                                                                    | BIA-Obesity | 3           | 2           | 3         | 1        | 1          | 3             |
| 138       | Does the company make a commitment to address the price / affordability of healthy products relative to unhealthy products, particularly where there are comparable substitutes?                                                                                                                                                                                                                                                                                                                                                                                                                                                                                                                                                                                                            | 10: Commitment that standard prices of healthy products are lower than standard prices of comparable unhealthy products<br>5: Commitment that standard prices of healthy products are equivalent to standard prices of comparable unhealthy products<br>2.5: Broad commitment only<br>0: No commitment / no information available to the research team                                                                                                                                                                                                                                        | BIA-Obesity | 3           | 2           | 1         | 1        | 1          | 3             |
| 139       | Does the company have a published position on the size and nature of discounts / price promotions applied to healthy and unhealthy foods?                                                                                                                                                                                                                                                                                                                                                                                                                                                                                                                                                                                                                                                   | 10: Commitment to no price promotions on unhealthy foods<br>7.5: Commitment to greater levels of discount typically applying to healthy foods compared to unhealthy foods across all food categories<br>5: Commitment to the same types / levels of discounts typically applying on healthy and unhealthy foods across all food categories                                                                                                                                                                                                                                                    | BIA-Obesity | 3           | 2           | 1         | 1        | 1          | 3             |

| metric ID | Metric                                                                                                                                                                                                                                                                                                                                                                                                                                | Details for Metric use   Scoring Criteria                                                                                                                                                                                                                                                                                                                                                                                                                                                                                                                                                                                                                                                                                                                                                                                                                                                                                                                                                                                                                                                                                                                                                                                                                                                                | Framework   | Materiality | Objectivity | Alignment | Activity | Resolution | Verifiability |
|-----------|---------------------------------------------------------------------------------------------------------------------------------------------------------------------------------------------------------------------------------------------------------------------------------------------------------------------------------------------------------------------------------------------------------------------------------------|----------------------------------------------------------------------------------------------------------------------------------------------------------------------------------------------------------------------------------------------------------------------------------------------------------------------------------------------------------------------------------------------------------------------------------------------------------------------------------------------------------------------------------------------------------------------------------------------------------------------------------------------------------------------------------------------------------------------------------------------------------------------------------------------------------------------------------------------------------------------------------------------------------------------------------------------------------------------------------------------------------------------------------------------------------------------------------------------------------------------------------------------------------------------------------------------------------------------------------------------------------------------------------------------------------|-------------|-------------|-------------|-----------|----------|------------|---------------|
|           |                                                                                                                                                                                                                                                                                                                                                                                                                                       | 2.5: Commitment to the same types / levels of discounts typically applying on healthy and unhealthy foods for some food categories<br>0: No policy / no information available to the research team                                                                                                                                                                                                                                                                                                                                                                                                                                                                                                                                                                                                                                                                                                                                                                                                                                                                                                                                                                                                                                                                                                       |             |             |             |           |          |            |               |
| 140       | Does the company make a commitment to limit multi-buy specials (e.g. two for one) on unhealthy foods?                                                                                                                                                                                                                                                                                                                                 | 10: Commitment to no multi-buy specials for unhealthy foods<br>5: Commitment to limit multi-buy specials for unhealthy foods<br>0: No commitment / no information available to the research team                                                                                                                                                                                                                                                                                                                                                                                                                                                                                                                                                                                                                                                                                                                                                                                                                                                                                                                                                                                                                                                                                                         | BIA-Obesity | 2           | 2           | 1         | 1        | 1          | 3             |
| 141       | Does the company make a clear and specific commitment to increase the availability of healthy products and/or decrease the availability of unhealthy products?                                                                                                                                                                                                                                                                        | 10: Yes, published and clear commitment for whole of business (across product portfolio) or over a range of key settings (including remote communities, schools, hospitals and community events)<br>7.5: Yes, not published and clear commitment for whole of business (across product portfolio) or over a range of key settings (including remote communities, schools, hospitals and community events)<br>5: Yes, not published or in relation to some specific settings (e. e.g. schools, remote communities, community events or hospitals) and/or low-income consumers<br>2.5: Some commitment applicable to some specific settings (e.g. schools, remote communities, hospitals, community events)<br>0: No commitment / no information                                                                                                                                                                                                                                                                                                                                                                                                                                                                                                                                                           | BIA-Obesity | 3           | 2           | 1         | 1        | 1          | 2             |
| 142       | What system / criteria (e.g., product classification system or nutrient profiling system) does the company use to classify the healthiness of products for the purposes of product pricing and availability (e.g. dedicated amount of shelf space, product placement at end of aisles/high traffic areas, product placement at checkout)? If a proprietary NPS, detail which products, nutrients and food characteristics are covered | 10: Adopted official national or regional classification system (developed by WHO, PAHO, national government, etc.)<br>5: Developed own system that has been validated and shows strong alignment with official national (or regional) classification systems / dietary guidelines, published in peer-reviewed literature<br>2.5: Developed own system that has been validated and shows alignment with official national (or regional) classification systems / dietary guidelines, not published in peer-reviewed literature<br>0: No information / poor alignment / does not have a system                                                                                                                                                                                                                                                                                                                                                                                                                                                                                                                                                                                                                                                                                                            | BIA-Obesity | 2           | 3           | 2         | 2        | 2          | 2             |
| 143       | The company can evidence reducing food insecurity by improving the accessibility and affordability of healthy food via at least one major strategic or collaborative initiative                                                                                                                                                                                                                                                       | For a maximum score companies should evidence quantitative outcomes from at least one strategic (non-philanthropic) activity to increase affordability or accessibility of healthy food (for example in the UK by adding value to the healthy start scheme, ensuring nutrition quality of free school meals, pricing strategies of healthy options, providing free or discounted healthy options for vulnerable groups). Evidence of engaging with such activities (but without quantitative outcomes) achieves a score of 2; having commitments to make healthy food available for all but with no clear indication of strategy activity achieve a score of 1.<br><br>For qualitative metrics such as those referring to policies, strategies or collaborative actions:<br>3: Company can demonstrate outcomes from strategies or collaborative action relating to the issue<br>2: Company has policies, strategies or participates in collaborative actions, but lacks clear outcomes from these<br>1: Company recognises the issue through policies, strategies or collaborative actions, but no evidence is found that the company is making it a priority through policies, strategies or collaborative actions.<br>0: No evidence is found that a company recognises the issue as being important. | PUP         | 3           | 2           | 1         | 3        | 1          | 2             |
| 144       | The company can evidence reducing food insecurity by improving the accessibility and                                                                                                                                                                                                                                                                                                                                                  | For a maximum score companies should evidence quantitative outcomes from at least one strategic (non-philanthropic) activity to increase affordability or accessibility of healthy food (for example in the UK by adding value to the healthy start scheme, ensuring nutrition quality of                                                                                                                                                                                                                                                                                                                                                                                                                                                                                                                                                                                                                                                                                                                                                                                                                                                                                                                                                                                                                | PUP         | 2           | 2           | 1         | 3        | 1          | 2             |

| metric ID                             | Metric                                                                                                                                                                                   | Details for Metric use   Scoring Criteria                                                                                                                                                                                                                                                                                                                                                                                                                                                                                                                                                                                                                                                                                                                                                                                                                                                                                                                                                                      | Framework | Materiality | Objectivity | Alignment | Activity | Resolution | Verifiability |
|---------------------------------------|------------------------------------------------------------------------------------------------------------------------------------------------------------------------------------------|----------------------------------------------------------------------------------------------------------------------------------------------------------------------------------------------------------------------------------------------------------------------------------------------------------------------------------------------------------------------------------------------------------------------------------------------------------------------------------------------------------------------------------------------------------------------------------------------------------------------------------------------------------------------------------------------------------------------------------------------------------------------------------------------------------------------------------------------------------------------------------------------------------------------------------------------------------------------------------------------------------------|-----------|-------------|-------------|-----------|----------|------------|---------------|
|                                       | affordability of healthy food via at least one major strategic or collaborative initiative                                                                                               | free school meals, pricing strategies of healthy options, providing free or discounted healthy options for vulnerable groups). Evidence of engaging with such activities (but without quantitative outcomes) achieves a score of 2; having commitments to make healthy food available for all but with no clear indication of strategy activity achieve a score of 1.<br><br>For qualitative metrics such as those referring to policies, strategies or collaborative actions:<br>3: Company can demonstrate outcomes from strategies or collaborative action relating to the issue<br>2: Company has policies, strategies or participates in collaborative actions, but lacks clear outcomes from these<br>1: Company recognises the issue through policies, strategies or collaborative actions, but no evidence is found that the company is making it a priority through policies, strategies or collaborative actions.<br>0: No evidence is found that a company recognises the issue as being important. |           |             |             |           |          |            |               |
| 145                                   | The company has a commitment to improve the accessibility and affordability of nutritious foods.                                                                                         |                                                                                                                                                                                                                                                                                                                                                                                                                                                                                                                                                                                                                                                                                                                                                                                                                                                                                                                                                                                                                | WBA       | 2           | 1           | 1         | 1        | 1          | 3             |
| 146                                   | The company has commercial activities to improve the accessibility of nutritious foods, especially for vulnerable groups.                                                                | Vulnerable groups include vulnerable and marginalised populations across countries as well as within countries and markets. Vulnerability to a higher risk of malnutrition (undernutrition, nutrient deficiencies and overweight, obesity and diet-related diseases) compared to the general population can vary by geography, income or other socio-economic factors as well as by age and life stage. Depending on the form of malnutrition, vulnerable groups can include infants, children, women of reproductive age, the elderly and/or low-income or marginalised households                                                                                                                                                                                                                                                                                                                                                                                                                            | WBA       | 2           | 1           | 1         | 2        | 1          | 2             |
| 147                                   | The company has a target to improve the accessibility of nutritious foods, especially for vulnerable groups, through its commercial activities and reports progress against this target. | Vulnerable groups include vulnerable and marginalised populations across countries as well as within countries and markets. Vulnerability to a higher risk of malnutrition (undernutrition, nutrient deficiencies and overweight, obesity and diet-related diseases) compared to the general population can vary by geography, income or other socio-economic factors as well as by age and life stage. Depending on the form of malnutrition, vulnerable groups can include infants, children, women of reproductive age, the elderly and/or low-income or marginalised households                                                                                                                                                                                                                                                                                                                                                                                                                            | WBA       | 2           | 1           | 1         | 2        | 1          | 3             |
| 148                                   | The company has a target to improve the affordability of nutritious foods, especially for vulnerable groups, through its commercial activities and reports progress against this target. | Vulnerable groups include vulnerable and marginalised populations across countries as well as within countries and markets. Vulnerability to a higher risk of malnutrition (undernutrition, nutrient deficiencies and overweight, obesity and diet-related diseases) compared to the general population can vary by geography, income or other socio-economic factors as well as by age and life stage. Depending on the form of malnutrition, vulnerable groups can include infants, children, women of reproductive age, the elderly and/or low-income or marginalised households                                                                                                                                                                                                                                                                                                                                                                                                                            | WBA       | 2           | 1           | 1         | 2        | 1          | 3             |
| <b>Product Marketing and Labeling</b> |                                                                                                                                                                                          |                                                                                                                                                                                                                                                                                                                                                                                                                                                                                                                                                                                                                                                                                                                                                                                                                                                                                                                                                                                                                |           |             |             |           |          |            |               |
| 149                                   | Does the company have a public responsible marketing policy that applies explicitly to the following media: (Tick all that apply)                                                        | All print media (newspapers, magazines, books, and printed advertising in public places)<br>All broadcast media (traditional TV, radio)<br>All non-broadcast electronic and/or digital media (its own & third-party websites, social media, mobile and SMS marketing, native online marketing, games and apps, CDs/DVDs)<br>All of in-store or point-of-sales marketing, including packaging<br>Sponsorship (e.g. of sporting, entertainment or cultural events or activities)<br>All additional forms of marketing (cinema, outdoor, product placement in movies, TV shows, etc.)                                                                                                                                                                                                                                                                                                                                                                                                                             | ATNI      | 2           | 2           | 1         | 1        | 1          | 3             |

| metric ID | Metric                                                                                                                                                                              | Details for Metric use   Scoring Criteria                                                                                                                                                                                                                                                                                                                                                                                                                                                                                                                                                                                                                                                                                                                                                                                                                                                                                                                                                                                                                                                                                                                                                                                                                                                                                                                                                                                                                                                                                                                                                                                                                                                                              | Framework | Materiality | Objectivity | Alignment | Activity | Resolution | Verifiability |
|-----------|-------------------------------------------------------------------------------------------------------------------------------------------------------------------------------------|------------------------------------------------------------------------------------------------------------------------------------------------------------------------------------------------------------------------------------------------------------------------------------------------------------------------------------------------------------------------------------------------------------------------------------------------------------------------------------------------------------------------------------------------------------------------------------------------------------------------------------------------------------------------------------------------------------------------------------------------------------------------------------------------------------------------------------------------------------------------------------------------------------------------------------------------------------------------------------------------------------------------------------------------------------------------------------------------------------------------------------------------------------------------------------------------------------------------------------------------------------------------------------------------------------------------------------------------------------------------------------------------------------------------------------------------------------------------------------------------------------------------------------------------------------------------------------------------------------------------------------------------------------------------------------------------------------------------|-----------|-------------|-------------|-----------|----------|------------|---------------|
|           |                                                                                                                                                                                     | The channel coverage of the responsible marketing policy (or policies) is assessed in this indicator, whether the policy covers only children, teens or all consumers. If different marketing policies exist for different audiences (for children, teens or all consumers), or for a different reason differences in channel coverage apply between audiences, only those media are scored that are common to both policies.                                                                                                                                                                                                                                                                                                                                                                                                                                                                                                                                                                                                                                                                                                                                                                                                                                                                                                                                                                                                                                                                                                                                                                                                                                                                                          |           |             |             |           |          |            |               |
| 150       | Does the company's public responsible marketing policy include the following commitments related to the representation of products? (Tick all that apply)                           | <p>Commits to presenting products in the appropriate portion size and context (and not to condone or encourage excess consumption) (Article 1 of ICC**)</p> <p>All nutritional and health-benefit information and claims for food and beverage products should have a sound scientific basis (Art. 9**). And where claims or terminology used in marketing communications might reasonably be interpreted by a consumer as health or nutrition claims, they should be supportable with appropriate scientific evidence. (Article 4 of ICC**)</p> <p>Commits that copy, sound and visual presentations in marketing communications for food and beverage products should accurately represent the material characteristics of the product featured, such as taste, size, content nutrition or health benefits, and should not mislead consumers concerning any of those characteristics. (Article 5 of ICC**)</p> <p>Commits not to represent food products not intended to be substitutes for meals as such. (Article 5 of ICC**)</p> <p>Commits not to use consumer taste or preference tests in a way that might imply statistical validity if there is none. Testimonials are based on well-accepted and recognized opinion from experts. (Article 9 of ICC**)</p> <p>Commits not to undermine the concept of healthy balanced diets, or the importance of a healthy active lifestyle. (Article 17 of ICC**)</p> <p>Commits not to use any models with a BMI of under 18.5 (industry best practice)</p> <p>Commits to presenting products in the context of a balanced diet (industry best practice)</p> <p>Disclosure needs to be mandatory, therefore the policy needs to be public for the company to score.</p> | ATNI      | 3           | 3           | 3         | 1        | 1          | 3             |
| 151       | For transparency in its marketing activities, does the company commit: (Tick all that apply)                                                                                        | <p>To clearly display the company or brand name when advertising on virtual media</p> <p>To ensure that the true commercial purpose of marketing communications is transparent and recognizable as an advertisement; and to clearly differentiate, by labelling, advertising and content on virtual media, including so-called "native advertising" (Art. 7, ICC Advertising and Marketing Communications Code, 2018)</p> <p>According to Article 7 ICC Advertising and Marketing Communications Code, 2018, "a communication promoting the sale of a product should not be disguised as, for example, market research, consumer surveys, user-generated content, private blogs, private postings on social media or independent reviews."</p>                                                                                                                                                                                                                                                                                                                                                                                                                                                                                                                                                                                                                                                                                                                                                                                                                                                                                                                                                                         | ATNI      | 2           | 2           | 3         | 1        | 1          | 3             |
| 152       | Does the company make an explicit commitment to developing and delivering marketing strategies appropriate to reaching priority populations, in all countries in which it operates? | <p>Yes</p> <p>No</p> <p>No information</p> <p>Not applicable</p> <p>Additional information: For companies that are active in developing countries, reaching priority populations with a high burden of undernutrition and micronutrient deficiencies is an essential element of the company's commitment in order to be credited. However, even when considered a priority population group, marketing directly to children should not be considered under this indicator – as marketing policies aimed at children are to be considered in Criterion D2.</p>                                                                                                                                                                                                                                                                                                                                                                                                                                                                                                                                                                                                                                                                                                                                                                                                                                                                                                                                                                                                                                                                                                                                                          | ATNI      | 2           | 1           | 1         | 1        | 1          | 3             |

| metric ID | Metric                                                                                                                                                                     | Details for Metric use   Scoring Criteria                                                                                                                                                                                                                                                                                                                                                                                                                                                                                                                                                                                                                                                                                                                                                                                                                                                                                                                                                                                                                                                                                                                             | Framework | Materiality | Objectivity | Alignment | Activity | Resolution | Verifiability |
|-----------|----------------------------------------------------------------------------------------------------------------------------------------------------------------------------|-----------------------------------------------------------------------------------------------------------------------------------------------------------------------------------------------------------------------------------------------------------------------------------------------------------------------------------------------------------------------------------------------------------------------------------------------------------------------------------------------------------------------------------------------------------------------------------------------------------------------------------------------------------------------------------------------------------------------------------------------------------------------------------------------------------------------------------------------------------------------------------------------------------------------------------------------------------------------------------------------------------------------------------------------------------------------------------------------------------------------------------------------------------------------|-----------|-------------|-------------|-----------|----------|------------|---------------|
| 153       | Can the company provide evidence of taking steps to understand and reach priority populations, with appropriate products through tailored marketing? (Tick all that apply) | <p>Has done research to generate consumer and marketing insights relating to priority populations</p> <p>Has used multiple communication channels and worked with professionals in the communications field (creative agencies, behavioral specialists) to ensure communication is compelling and appropriate to drive desired behavior change of priority populations</p> <p>Has conducted evaluations to assess the implementation of the specific marketing measures aimed at priority populations</p> <p>Not applicable</p> <p>For companies that are active in low- and middle-income (LMIC) countries, reaching priority populations with a high burden of undernutrition and micronutrient deficiencies is an essential element of the company's commitment in order to be credited. It is important that products for priority populations are healthy and, if fortified, fortified according to the appropriate guidelines. For this reason, the healthy multiplier is applied in this indicator, as it is based on the assessment in Criterion B3, which addresses both the elements related to (definition of) healthiness and fortification approach.</p> | ATNI      | 2           | 2           | 1         | 2        | 1          | 2             |
| 154       | Does the company have a public policy that addresses responsible marketing to children specifically? (For information only, not scored)                                    | <p>Yes</p> <p>No</p> <p>The following documents form the basis for the assessment of responsible marketing to children and teens:</p> <p>The 2010 World Health Organization (WHO) 'Set of recommendations on the marketing of foods and non-alcoholic beverages to children'</p> <p>The 2018 UNICEF document 'A Child Rights-Based Approach to Food Marketing: A Guide for Policy Makers'</p> <p>Furthermore, the ICC Framework for Responsible Food and Beverage Marketing Communications, 2019 provides further guidance on what the ICC Advertising and Marketing Communications Code means when applied to the marketing of foods and beverages.</p>                                                                                                                                                                                                                                                                                                                                                                                                                                                                                                              | ATNI      | 2           | 3           | 2         | 1        | 1          | 3             |
| 155       | 2.1. What kind of products does the company advertise to children and/or teens?                                                                                            | <p>No products</p> <p>Only products meeting WHO regional standards*</p> <p>Only products meeting the company's own or industry association-related standards for marketing to children and/or teens</p> <p>No product restriction or all products</p> <p>No information</p> <p>* Regional Nutrient Profile Models to implement recommendations on the marketing of foods and non-alcoholic beverages to children have been defined by the World Health Organization for all regions (except for Africa as of 22 August 2019, but the publication of that model is pending).</p>                                                                                                                                                                                                                                                                                                                                                                                                                                                                                                                                                                                       | ATNI      | 2           | 2           | 2         | 2        | 1          | 2             |
| 156       | 2.2. To which age range does the restriction in advertising apply?                                                                                                         | <p>Children and teens below the age of 18</p> <p>Children below the age of 12</p> <p>Children below the age of 6</p> <p>No restriction applied</p> <p>No information</p>                                                                                                                                                                                                                                                                                                                                                                                                                                                                                                                                                                                                                                                                                                                                                                                                                                                                                                                                                                                              | ATNI      | 1           | 3           | 1         | 2        | 1          | 2             |
| 157       | Does the company commit to using responsible marketing techniques aimed at children and/or teens, by: (Tick all that apply)                                                | <p>Not to create a sense of urgency</p> <p>Not to use inappropriate price minimization</p> <p>Not to exploit a child's imagination in a way that could mislead him/her about the nutritional benefits of the product involved</p> <p>Supporting the role of parents or others responsible for guiding diet and lifestyle choices or not to undermine the role of parents or other responsible for guiding diet and lifestyle choices</p>                                                                                                                                                                                                                                                                                                                                                                                                                                                                                                                                                                                                                                                                                                                              | ATNI      | 2           | 2           | 3         | 1        | 1          | 3             |

| metric ID | Metric                                                                                                                                                           | Details for Metric use   Scoring Criteria                                                                                                                                                                                                                                                                                                                                                                                                                                                                                                                                                                                                                                                                                                                                                                                                                                                                                                                                                                                                                                                                                                                                                                                                                                                              | Framework | Materiality | Objectivity | Alignment | Activity | Resolution | Verifiability |
|-----------|------------------------------------------------------------------------------------------------------------------------------------------------------------------|--------------------------------------------------------------------------------------------------------------------------------------------------------------------------------------------------------------------------------------------------------------------------------------------------------------------------------------------------------------------------------------------------------------------------------------------------------------------------------------------------------------------------------------------------------------------------------------------------------------------------------------------------------------------------------------------------------------------------------------------------------------------------------------------------------------------------------------------------------------------------------------------------------------------------------------------------------------------------------------------------------------------------------------------------------------------------------------------------------------------------------------------------------------------------------------------------------------------------------------------------------------------------------------------------------|-----------|-------------|-------------|-----------|----------|------------|---------------|
|           |                                                                                                                                                                  | <p>Ensuring that marketing materials contain an educative message in relation to healthy diets and lifestyles<br/>Not to brand merchandise aimed at children except related to healthy products</p> <p>The first three answer options relate directly to Article 18 of the ICC Framework for Responsible Food and Beverage Marketing Communications, 2019, sets forth how general principles of the ICC Advertising and Marketing Communications code, 2018, which governs all marketing communications, and includes separate sections on sales promotion, sponsorship, direct marketing, digital interactive marketing and environmental marketing, is applied in the context of food and beverage marketing communications.</p> <p>The commitment to 'supporting the role of parents or others responsible for guiding diet and lifestyle choices or not to undermine the role of parents or other responsible for guiding diet and lifestyle choices (industry best practice)' is consistent with the approach to the role of parents (section 3.4, page 46) of the 2018 UNICEF document 'A Child Rights-Based Approach to Food Marketing: A Guide for Policy Makers'</p> <p>The last two answer options are industry best practices to ensure responsible marketing to children and/or teens.</p> |           |             |             |           |          |            |               |
| 158       | Does the company commit to use children, celebrities (including influencers) or fantasy and animated characters responsibly or not at all? (Tick all that apply) | <p>Commits not to sponsor people, materials or activities popular with children and/or teens at all or except in conjunction with healthy products<br/>Commits to not depict children on packaging at all or except in conjunction with healthy products<br/>Pledges not to use celebrities and other people with strong appeal to children and/or teens in marketing of products at all or except in conjunction with healthy products<br/>Pledges that celebrities or others (including influencers), if used in marketing, will not imply they have achieved their enhanced performance or status through use of the product<br/>Pledges not to use third-party nor own fantasy and animation characters with a strong appeal to children and/or teens in marketing of products at all or except in conjunction with healthy products, IN ALL FORMS OF MARKETING<br/>Pledges not to use third-party nor own fantasy and animation characters with a strong appeal to children and/or teens in marketing of products at all or except in conjunction with healthy products, with an exception for point of sale and packaging</p> <p>For this indicator, the last two answer options are mutually exclusive, and therefore, only one of these two options may be selected.</p>                       | ATNI      | 2           | 2           | 1         | 1        | 1          | 3             |
| 159       | Regarding responsible use of promotional toys, games, vouchers and competitions; does the company commit to:                                                     | <p>Never make use of promotional games, toys, vouchers, competitions etc. in their marketing to children and/or teens<br/>Using promotional games, toys, vouchers, competitions etc. only in accordance to WHO regional standards*<br/>Using promotional games, toys, vouchers, competitions etc. only in accordance to the company's own or industry association-related standards for marketing to children and/or teens<br/>No commitment<br/>No information</p> <p>* Regional Nutrient Profile Models to implement recommendations on the marketing of foods and non-alcoholic beverages to children have been defined by the World Health Organization for all regions</p>                                                                                                                                                                                                                                                                                                                                                                                                                                                                                                                                                                                                                        | ATNI      | 2           | 3           | 2         | 1        | 1          | 3             |

| metric ID | Metric                                                                                                                                                         | Details for Metric use   Scoring Criteria                                                                                                                                                                                                                                                                                                                                                                                                                                                                                                                                                                                                                                                                                                                                                                                                                                                                                                                                                                                                                                                                                                                                                                  | Framework | Materiality | Objectivity | Alignment | Activity | Resolution | Verifiability |
|-----------|----------------------------------------------------------------------------------------------------------------------------------------------------------------|------------------------------------------------------------------------------------------------------------------------------------------------------------------------------------------------------------------------------------------------------------------------------------------------------------------------------------------------------------------------------------------------------------------------------------------------------------------------------------------------------------------------------------------------------------------------------------------------------------------------------------------------------------------------------------------------------------------------------------------------------------------------------------------------------------------------------------------------------------------------------------------------------------------------------------------------------------------------------------------------------------------------------------------------------------------------------------------------------------------------------------------------------------------------------------------------------------|-----------|-------------|-------------|-----------|----------|------------|---------------|
| 160       | What percentage audience threshold does the company use to restrict its advertising on measured media to avoid inappropriately reaching children and/or teens? | <p>&lt;25%<br/>26-35%<br/>36-50%<br/>&gt;50%<br/>No audience threshold<br/>No information</p> <p>Measured media is where audience is audited, which is usually TV.</p> <p>If different thresholds are used for different age ranges, the least strict threshold will be scored (representing the lowest score).</p>                                                                                                                                                                                                                                                                                                                                                                                                                                                                                                                                                                                                                                                                                                                                                                                                                                                                                        | ATNI      | 1           | 2           | 1         | 2        | 3          | 2             |
| 161       | To which age range does the restriction in advertising apply?                                                                                                  | <p>Children and teens below the age of 18<br/>Children below the age of 12<br/>Children below the age of 6<br/>No restriction<br/>No information</p>                                                                                                                                                                                                                                                                                                                                                                                                                                                                                                                                                                                                                                                                                                                                                                                                                                                                                                                                                                                                                                                       | ATNI      | 1           | 3           | 1         | 2        | 1          | 2             |
| 162       | Does the company utilize tools to ensure that its digital marketing does not reach younger age groups? (Tick all that apply)                                   | <p>Ensuring design of websites/pages/social media/apps is appropriate to adults predominantly, i.e. not designed to attract children and/or teens<br/>Age screening prior to logging on/registering (e.g. enter DOB or require parent to consent)<br/>Review of age-related data to determine demographic that is targeted by its digital marketing<br/>Ensuring adverts are designed deliberately not to appeal to children and/or teens<br/>Nature of third-party websites chosen to advertise on (i.e. ages targeted)</p>                                                                                                                                                                                                                                                                                                                                                                                                                                                                                                                                                                                                                                                                               | ATNI      | 1           | 2           | 1         | 2        | 1          | 2             |
| 163       | To which digital media and forms of marketing does the company apply the tools listed above?                                                                   | <p>Tools include:<br/>Ensuring design of websites/pages/social media/apps is appropriate to adults predominantly, i.e. not designed to attract children and/or teens<br/>Age screening prior to logging on/registering (e.g. enter DOB or require parent to consent)<br/>Review of age-related data to determine demographic that is targeted by its digital marketing<br/>Ensuring adverts are designed deliberately not to appeal to children and/or teens<br/>Nature of third-party websites chosen to advertise on (i.e. ages targeted)</p> <p>All forms** and digital media, including own- and third-party digital media<br/>Only own digital media or limited in another way<br/>No separate consideration of how to address 'child audience' for these media<br/>No information</p> <p>**Digital marketing techniques encompasses the insertion of advertising and other promotions in content that is accessible online and through digital devices. It includes specific types: native advertising, influencer marketing, advergames and immersive environments, branded environments, viral marketing, location targeting, sponsored search results, neuromarketing and sentiment analysis.</p> | ATNI      | 1           | 2           | 1         | 2        | 1          | 2             |
| 164       | To what extent does the company commit to a responsible marketing approach near and in PRIMARY schools (for children up to age 12)?                            | <p>No marketing or advertising in or near PRIMARY schools<br/>No marketing or advertising in PRIMARY schools<br/>Only marketing/advertising 'healthy' products in (or near) PRIMARY schools in agreement with schools/parents<br/>The company does not commit to this<br/>No information</p>                                                                                                                                                                                                                                                                                                                                                                                                                                                                                                                                                                                                                                                                                                                                                                                                                                                                                                               | ATNI      | 2           | 2           | 1         | 1        | 1          | 3             |

| metric ID | Metric                                                                                                                                                                                                                                                                                                    | Details for Metric use   Scoring Criteria                                                                                                                                                                                                                                                                                                                                                                                                                                                                                                                                                                                                                                                                                                                                            | Framework | Materiality | Objectivity | Alignment | Activity | Resolution | Verifiability |
|-----------|-----------------------------------------------------------------------------------------------------------------------------------------------------------------------------------------------------------------------------------------------------------------------------------------------------------|--------------------------------------------------------------------------------------------------------------------------------------------------------------------------------------------------------------------------------------------------------------------------------------------------------------------------------------------------------------------------------------------------------------------------------------------------------------------------------------------------------------------------------------------------------------------------------------------------------------------------------------------------------------------------------------------------------------------------------------------------------------------------------------|-----------|-------------|-------------|-----------|----------|------------|---------------|
|           |                                                                                                                                                                                                                                                                                                           | Additional information: This indicator refers to any formal school or schooling system that is attended by children up to age 12, however, in countries in which primary or elementary school is attended by children up to age 11, a responsible marketing commitment linked to primary or elementary schools will be credited for this indicator.                                                                                                                                                                                                                                                                                                                                                                                                                                  |           |             |             |           |          |            |               |
| 165       | To what extent does the company commit to a responsible marketing approach near and in SECONDARY schools (for teens)?                                                                                                                                                                                     | <p>No marketing or advertising in or near SECONDARY schools</p> <p>No marketing or advertising in SECONDARY schools</p> <p>Only marketing/advertising 'healthy' products in (or near) SECONDARY schools in agreement with schools/parents</p> <p>The company does not commit to this</p> <p>No information</p> <p>Additional information: "teens" means those individuals aged 13-17 years (ICC 2018). This indicator is only credited for school-related commitments up to and including age 17. For example, US middle school commitments, which typically include individuals up to age 13 or 14, are not considered relevant to be credited in this indicator.</p>                                                                                                               | ATNI      | 2           | 2           | 2         | 1        | 1          | 3             |
| 166       | Concerning the form and digital medium of advertisement in schools, does the company: (Tick all that apply)                                                                                                                                                                                               | <p>Extend its commitment explicitly to new media marketing/advertising techniques in or related to schools</p> <p>Include offering 'educational materials' only when in agreement with schools/parents in its commitment</p> <p>Additional information: this indicator applies to commitments linked to primary and/or secondary schools.</p>                                                                                                                                                                                                                                                                                                                                                                                                                                        | ATNI      | 1           | 2           | 1         | 1        | 1          | 3             |
| 167       | To what extent does the company commit to a responsible marketing approach in other places where children gather (childcare and other educational establishments, family and child clinics, pediatric services or other health facilities, including sporting or cultural events held at those premises)? | <p>No marketing or advertising in or near these settings</p> <p>No marketing or advertising in these settings</p> <p>Only marketing/advertising 'healthy' products in (or near) these settings in consultation with their management and users</p> <p>No commitment</p> <p>No information</p> <p>Additional information: This indicator relates to Rec. 5, WHO Recommendations on the Marketing of Food and Non-Alcoholic Beverages to Children, 2012.</p>                                                                                                                                                                                                                                                                                                                           | ATNI      | 2           | 2           | 2         | 1        | 1          | 3             |
| 168       | Does the company audit its compliance with its policy, including on marketing to children?                                                                                                                                                                                                                | <p>Yes, covering all audiences, including children and/or teens</p> <p>Yes, but only for children and/or teens</p> <p>No audit</p> <p>No information</p>                                                                                                                                                                                                                                                                                                                                                                                                                                                                                                                                                                                                                             | ATNI      | 2           | 3           | 1         | 2        | 1          | 2             |
| 169       | How is compliance assessed regarding children and/or teens?                                                                                                                                                                                                                                               | <p>The company appoints an independent external auditor (not related to, or in addition to, an industry association-appointed third-party auditor)</p> <p>By an industry association or an industry association-appointed third-party auditor</p> <p>The company conducts its own audits</p> <p>No audit</p> <p>No information</p> <p>Although an industry association or pledge organization (e.g. IFBA, CFBAI, etc.) may appoint a third-party auditor, the first answer option 'the company appoints an independent external auditor' is only credited if a company commissions additional independent auditing to complement industry association or pledge organization auditing, or if it commissions a comprehensive third-party compliance audit on an individual basis.</p> | ATNI      | 1           | 2           | 1         | 2        | 1          | 2             |



| metric ID | Metric                                                                                                                                     | Details for Metric use   Scoring Criteria                                                                                                                                                                                                                                                                                                                                                                                                                                                                                                                                                                                                                                                                                                                                                        | Framework | Materiality | Objectivity | Alignment | Activity | Resolution | Verifiability |
|-----------|--------------------------------------------------------------------------------------------------------------------------------------------|--------------------------------------------------------------------------------------------------------------------------------------------------------------------------------------------------------------------------------------------------------------------------------------------------------------------------------------------------------------------------------------------------------------------------------------------------------------------------------------------------------------------------------------------------------------------------------------------------------------------------------------------------------------------------------------------------------------------------------------------------------------------------------------------------|-----------|-------------|-------------|-----------|----------|------------|---------------|
| 170       | Does the company assess compliance of all aspects of marketing (covering all audiences)?                                                   | Yes, to the same standards that it applies in assessing compliance regarding children and/or teens<br>Yes, but to less restrictive standards<br>No<br>No information                                                                                                                                                                                                                                                                                                                                                                                                                                                                                                                                                                                                                             | ATNI      | 2           | 2           | 1         | 2        | 1          | 2             |
| 171       | How often is the audit undertaken?                                                                                                         | Annually, covering all audiences, including children and teens<br>Annually, covering children and/or teens only; and less frequently for other audiences<br>Less frequently than annually, for any audience covered by the audit<br>No<br>No information                                                                                                                                                                                                                                                                                                                                                                                                                                                                                                                                         | ATNI      | 1           | 3           | 1         | 2        | 1          | 2             |
| 172       | Which forms of advertisement and media (including both traditional and new media) are covered by the audit:                                | The company audits compliance across all media and in all its forms<br>The company audits compliance across main print, traditional and digital media, but with no specific reference to the forms of marketing used<br>The company audits compliance across limited selection of media is unclear but there is clear evidence of auditing<br>No audit<br>No information<br><br>Additional information: This indicator assesses the company's level of transparency in its advertisement, in accordance with article 7 of new ICC Code 2018.                                                                                                                                                                                                                                                     | ATNI      | 2           | 2           | 2         | 2        | 1          | 2             |
| 173       | What is the company's individual compliance level for TV and digital marketing? (%)                                                        | Report separately for Tv and digital marketing:<br>Over 90%<br>Less than 90% or no reporting<br>No information<br><br>Individual compliance refers to company's non-aggregated compliance level. Digital media refers to social networks i.e. Facebook, Twitter, blogs, YouTube, online newspapers.                                                                                                                                                                                                                                                                                                                                                                                                                                                                                              | ATNI      | 2           | 2           | 1         | 3        | 3          | 2             |
| 174       | Does the company have a response mechanism to ensure corrective measures are taken regarding any non-compliance with its marketing policy? | A response mechanism for corrective action, if needed<br>No response mechanism for corrective action<br>No information                                                                                                                                                                                                                                                                                                                                                                                                                                                                                                                                                                                                                                                                           | ATNI      | 1           | 2           | 1         | 2        | 1          | 2             |
| 175       | Does the company publicly commit to disclose nutrition information on its products?                                                        | Back-Of-Pack and Front-Of-Pack<br>Back-Of-Pack only<br>No commitment<br>No information<br><br>Legal requirements for Back-Of-Pack and Front-Of-Pack labelling vary widely between countries. This indicator assesses whether companies have a policy on providing Back-Of-Pack and Front-Of-Pack nutrition information, ideally defined as a consistent, global approach (wherever legally allowed and accommodating for specific local regulation).<br><br>Any type of Front-Of-Pack commitment that applies globally (e.g. to show %GDA information), or a commitment to display interpretive Front-Of-Pack labelling wherever voluntary government-endorsed systems exist, will be credited for this indicator's first answer option, provided a Back-Of-Pack commitment is in place as well. | ATNI      | 2           | 3           | 1         | 1        | 1          | 3             |
| 176       | Does the company publicly commit to provide Back-Of-Pack nutrition information on key relevant nutrients? (Tick all that apply)            | All nutrients according to Codex Alimentarius Guidelines CAC/GL 2-1985 (i.e. energy value, protein, total carbohydrates, total sugars, total fat, saturated fat, sodium)<br>Added sugars                                                                                                                                                                                                                                                                                                                                                                                                                                                                                                                                                                                                         | ATNI      | 2           | 3           | 3         | 1        | 1          | 3             |

| metric ID | Metric                                                                                                                                                                                                                         | Details for Metric use   Scoring Criteria                                                                                                                                                                                                                                                                                                                                                                                                                                                                                                                                                                                                                                                                                                                                                                                                                                                                                                                                                                                                                                                                                                                                                                                                                           | Framework | Materiality | Objectivity | Alignment | Activity | Resolution | Verifiability |
|-----------|--------------------------------------------------------------------------------------------------------------------------------------------------------------------------------------------------------------------------------|---------------------------------------------------------------------------------------------------------------------------------------------------------------------------------------------------------------------------------------------------------------------------------------------------------------------------------------------------------------------------------------------------------------------------------------------------------------------------------------------------------------------------------------------------------------------------------------------------------------------------------------------------------------------------------------------------------------------------------------------------------------------------------------------------------------------------------------------------------------------------------------------------------------------------------------------------------------------------------------------------------------------------------------------------------------------------------------------------------------------------------------------------------------------------------------------------------------------------------------------------------------------|-----------|-------------|-------------|-----------|----------|------------|---------------|
|           |                                                                                                                                                                                                                                | Dietary fiber<br><br>Additional information: Listing of nutrients according to Article 3(2) of Codex Alimentarius Guidelines on Nutrition Labelling, CAC/GL 2-1985, last modified on 2017.<br>In case that following the abovementioned answer options would differ from specific national requirements as established per law in one of the markets in which a company operates, ATNI acknowledges that this commitment cannot apply. Therefore, the commitment would apply to all other markets.                                                                                                                                                                                                                                                                                                                                                                                                                                                                                                                                                                                                                                                                                                                                                                  |           |             |             |           |          |            |               |
| 177       | Does the company also commit to providing information on Front-Of-Pack?                                                                                                                                                        | In an interpretative format that is government-endorsed (where available) on ALL relevant products, providing indicators of how healthy the product is, rather than just numeric information<br>In an interpretative format that is government-endorsed (where available) on SOME relevant products, providing indicators of how healthy the product is, rather than just numeric information<br>Numeric information only, but showing % of Guideline Daily Amount (or similar measure) of multiple nutrients<br>Numeric information only, but showing % of Guideline Daily Amount (or similar measure) of a single nutrient or energy only<br>Numeric information on levels of key nutrients, but not showing % Guideline Daily Amount (or similar measure)<br>No Front-Of-Pack labelling used<br>No information<br><br>Interpretative format means using colors or symbols or other graphics to help consumers to understand the information. Government-endorsed interpretative Front-Of-Pack labelling that are assessed in indicator 3.1 refer to voluntary FOP labelling systems that are legally allowed and supported by government or other authorities in the country or jurisdiction. Mandatory FOP labelling systems are not relevant in indicator 3.1. | ATNI      | 3           | 2           | 2         | 1        | 1          | 3             |
| 178       | For countries in which mandatory Front-Of-Pack labelling systems are implemented, including health warning labels, does the company commit:                                                                                    | Not to provide additional interpretive labelling or other information Front-Of-Pack that directly relates to the message of the mandatory Front-Of-Pack labelling (which may confuse consumers or modify the effect of the mandatory labelling).<br>No commitment<br>Not applicable<br>Examples of Front-Of-Pack labelling or nutrition information have been observed in markets with mandatory health warning labels, in which case food and beverage companies added information Front-Of-Pack that undermined the message of the health warning. Indicator 3.2 assesses whether companies commit to not provide Front-Of-Pack information in that way.                                                                                                                                                                                                                                                                                                                                                                                                                                                                                                                                                                                                          | ATNI      | 2           | 3           | 1         | 1        | 1          | 3             |
| 179       | Does the company commit to providing Back-Of-Pack information on the quantity of nutrients as a percentage of the Guideline Daily Amounts (or similar measure)?                                                                | Yes, for all applicable nutrients and energy<br>Yes, for a selection of nutrients or energy only<br>No commitment<br>No information                                                                                                                                                                                                                                                                                                                                                                                                                                                                                                                                                                                                                                                                                                                                                                                                                                                                                                                                                                                                                                                                                                                                 | ATNI      | 2           | 2           | 2         | 1        | 1          | 3             |
| 180       | Does the company commit to providing nutritional information on a per 100g or per 100ml basis, and to providing portion- or serving-based information (Article 3.4 of Codex Alimentarius CAC/GL 2-1985)? (Tick all that apply) | Information on the amounts of energy and nutrients is expressed in g per 100 g or per 100 ml or per package if the package contains only a single portion<br>Information on the amounts of energy and nutrients is expressed per serving as quantified on the label or per portion provided that the number of portions contained in the package is stated.                                                                                                                                                                                                                                                                                                                                                                                                                                                                                                                                                                                                                                                                                                                                                                                                                                                                                                         | ATNI      | 1           | 3           | 3         | 1        | 1          | 3             |

| metric ID | Metric                                                                                                                                                                                                                                                                                                   | Details for Metric use   Scoring Criteria                                                                                                                                                                                                                                                                                                                                                                                                                                                                                                                                                                                                                                                                                                                                                                                                                                                                                                                                                                                              | Framework | Materiality | Objectivity | Alignment | Activity | Resolution | Verifiability |
|-----------|----------------------------------------------------------------------------------------------------------------------------------------------------------------------------------------------------------------------------------------------------------------------------------------------------------|----------------------------------------------------------------------------------------------------------------------------------------------------------------------------------------------------------------------------------------------------------------------------------------------------------------------------------------------------------------------------------------------------------------------------------------------------------------------------------------------------------------------------------------------------------------------------------------------------------------------------------------------------------------------------------------------------------------------------------------------------------------------------------------------------------------------------------------------------------------------------------------------------------------------------------------------------------------------------------------------------------------------------------------|-----------|-------------|-------------|-----------|----------|------------|---------------|
|           |                                                                                                                                                                                                                                                                                                          | This indicator assesses commitments regarding the information on the amounts of energy and nutrients according to Article 3.4.2, 3.4.3 and of Codex Alimentarius Guidelines on Nutrition Labelling, CAC/GL 2-1985, last modified on 2017                                                                                                                                                                                                                                                                                                                                                                                                                                                                                                                                                                                                                                                                                                                                                                                               |           |             |             |           |          |            |               |
| 181       | In what percentage of markets has the company rolled out its BOP labelling commitments that comply (at minimum) with Codex Alimentarius on Nutrition and Labelling CAC/GL 2-1985, last modified 2017?                                                                                                    | More than 80% (or more than 98% of products globally)<br>Between 50 – 79% (or more than 90% of products globally)<br>Between 6 – 49% (or more than 80% of products globally)<br>Less than 5% (or less than 79% of products globally)<br>No BOP labelling commitment in place<br>No information                                                                                                                                                                                                                                                                                                                                                                                                                                                                                                                                                                                                                                                                                                                                         | ATNI      | 2           | 2           | 3         | 3        | 3          | 1             |
| 182       | In what percentage of relevant markets has the company rolled out its full Front-Of-Pack labelling commitments, i.e. all products (95% or more) in those markets are labelled according to the commitments?                                                                                              | More than 80% (or more than 98% of products globally)<br>Between 50 – 79% (or more than 90% of products globally)<br>Between 6 – 49% (or more than 80% of products globally)<br>Less than 5% (or less than 79% of products globally)<br>No FOP labelling commitment in place<br>No information<br><br>This indicator assesses labelling implementation per market (country), however, if companies only register labelling roll-out per product (on SKU level), that can be scored as well as indicated in the answer options. Product volume information is not considered relevant for this assessment, as labelling is arranged on the level of single products (SKUs).<br><br>assessing the roll-out of Front-Of-Pack labelling commitments and depending on the type of commitment of the company, only those countries are taken into account for the calculation of the percentage of roll-out that have government-endorsed interpretive Front-Of-Pack labelling systems (in case companies commit to using interpretive Front | ATNI      | 2           | 2           | 1         | 3        | 3          | 1             |
| 183       | For what percentage of products does the company provide nutrition information online, accounting for country-specific differences in product compositions?                                                                                                                                              | For 90% or more of products<br>For between 50 - 90% of products<br>For between 10 - 49% of products<br>For less than 10% of products<br>No nutrition information published<br>No information<br><br>Additional information: This indicator assesses for how many products the company provides nutrition information online, taking into account country-specific differences in product composition. Therefore, country-specific access to nutrition information online needs to be available, or other assurance of accuracy of information in all markets the company is active in. To check for this specifically, the geographic multiplier applies to this indicator, to check whether nutrition information is online for the various markets the company is active in.                                                                                                                                                                                                                                                         | ATNI      | 2           | 2           | 1         | 3        | 3          | 2             |
| 184       | Does the company state that, for countries where no national regulatory system exists or where the local/national regulation is less strict than Codex Alimentarius Guidelines for Use of Nutrition and Health Claims, it will not place a health claim on a product unless it complies with the latter? | Yes, or the company commits to not using any health claims<br>No<br>No information<br>The company only commits to comply with Codex Alimentarius Guidelines for Use of Health Claims in countries where no national regulatory system exists                                                                                                                                                                                                                                                                                                                                                                                                                                                                                                                                                                                                                                                                                                                                                                                           | ATNI      | 3           | 3           | 3         | 1        | 1          | 3             |
| 185       | Does the company state that it will not place a health claim on a product unless it is healthy,                                                                                                                                                                                                          | Yes, only when it meets the nutrition criteria of a government-endorsed NPS<br>Yes, only when it meets the nutrition criteria of its formal internal NPS<br>Yes, only when it meets the nutrition criteria of its own precursor to an NPS (or similar)                                                                                                                                                                                                                                                                                                                                                                                                                                                                                                                                                                                                                                                                                                                                                                                 | ATNI      | 3           | 2           | 2         | 1        | 1          | 3             |

| metric ID | Metric                                                                                                                                                                                                                                                                                                                    | Details for Metric use   Scoring Criteria                                                                                                                                                                                                                                                                                                                                                                                                                                                                                                                                                                                                                                                                                                                                                                                                                                                                                                                                                                                                                                                                                    | Framework | Materiality | Objectivity | Alignment | Activity | Resolution | Verifiability |
|-----------|---------------------------------------------------------------------------------------------------------------------------------------------------------------------------------------------------------------------------------------------------------------------------------------------------------------------------|------------------------------------------------------------------------------------------------------------------------------------------------------------------------------------------------------------------------------------------------------------------------------------------------------------------------------------------------------------------------------------------------------------------------------------------------------------------------------------------------------------------------------------------------------------------------------------------------------------------------------------------------------------------------------------------------------------------------------------------------------------------------------------------------------------------------------------------------------------------------------------------------------------------------------------------------------------------------------------------------------------------------------------------------------------------------------------------------------------------------------|-----------|-------------|-------------|-----------|----------|------------|---------------|
|           | as defined in a relevant Nutrient Profiling System (NPS)?                                                                                                                                                                                                                                                                 | No<br>No information<br><br>Codex Alimentarius Guidelines for Use of Nutrition and Health Claims, CAC/GL 23-1997, last modified on 2013. It defines nutrition and health claims as follows:<br>"Nutrition claim means any representation which states, suggests or implies that a food has particular nutritional properties including but not limited to the energy value and to the content of protein, fat and carbohydrates, as well as the content of vitamins and minerals. The following do not constitute nutrition claims: (a) the mention of substances in the list of ingredients; (b) the mention of nutrients as a mandatory part of nutrition labelling; (c) quantitative or qualitative declaration of certain nutrients or ingredients on the label if required by national legislation.<br><br>Health claim means any representation that states, suggests, or implies that a relationship exists between a food or a constituent of that food and health."                                                                                                                                                 |           |             |             |           |          |            |               |
| 186       | Does the company state that, for countries where there is no regulation of nutrition claims or where the local/national regulation is less strict than Codex Alimentarius Guidelines for Use of Nutrition and Health Claims, it will not place a nutrition claim on a product unless that claim complies with the latter? | Yes, or the company commits to not using any nutrition claims<br>No<br>No information<br>The company only commits to comply with Codex Alimentarius Guidelines for Use of Nutrition Claims in countries where no national regulatory system exists                                                                                                                                                                                                                                                                                                                                                                                                                                                                                                                                                                                                                                                                                                                                                                                                                                                                           | ATNI      | 3           | 2           | 3         | 1        | 1          | 3             |
| 187       | 2.2. Does the company state that it will not place a nutrition claim on a product unless it is healthy, as defined in a relevant Nutrient Profiling System (NPS)?                                                                                                                                                         | Yes, only when it meets the nutrition criteria of a government-endorsed NPS<br>Yes, only when it meets the nutrition criteria of its formal internal NPS<br>Yes, only when it meets the nutrition criteria of its own precursor to an NPS (or similar)<br>No<br>No information<br><br>Codex Alimentarius Guidelines for Use of Nutrition and Health Claims, CAC/GL 23-1997, last modified on 2013.<br><br>An example of a government-endorsed NPS aiming to determine whether a product is suitable to carry a nutrition or health claim is the Australian FSANZ NPSC model (see <a href="http://www.foodstandards.gov.au/industry/labelling/Pages/Consumer-guide-to-NPSC.aspx">http://www.foodstandards.gov.au/industry/labelling/Pages/Consumer-guide-to-NPSC.aspx</a> for more information). ATNI considers products with a Health Star Rating of 3.5 or higher, or a Nutri-Score A or B, as equivalent, or company's own NPS that has been benchmarked objectively against these systems and threshold values and shown to be equivalent. For other NP systems used by companies, second answer option will be credited. | ATNI      | 3           | 2           | 2         | 1        | 1          | 3             |
| 188       | Does the company commit to using nutrition or health claims on products that have been fortified ONLY when they meet relevant Codex standards and the WHO/FAO Guidelines on Food Fortification with Micronutrients (see Additional information for specific reference)?                                                   | Yes<br>No<br>No information<br>Not applicable<br><br>Codex Alimentarius Guidelines for Use of Nutrition and Health Claims, CAC/GL 23-1997, last modified on 2013; and WHO/FAO Guidelines on Food Fortification with Micronutrients: <a href="https://www.who.int/nutrition/publications/micronutrients/9241594012/en/">https://www.who.int/nutrition/publications/micronutrients/9241594012/en/</a>                                                                                                                                                                                                                                                                                                                                                                                                                                                                                                                                                                                                                                                                                                                          | ATNI      | 1           | 3           | 3         | 1        | 1          | 3             |

| metric ID | Metric                                                                                                                                                                                                                           | Details for Metric use   Scoring Criteria                                                                                                                                                                                                                                                                                                                                                                                                                                                                                                                                                                                                                                                                                                                                                                                                                                                            | Framework | Materiality | Objectivity | Alignment | Activity | Resolution | Verifiability |
|-----------|----------------------------------------------------------------------------------------------------------------------------------------------------------------------------------------------------------------------------------|------------------------------------------------------------------------------------------------------------------------------------------------------------------------------------------------------------------------------------------------------------------------------------------------------------------------------------------------------------------------------------------------------------------------------------------------------------------------------------------------------------------------------------------------------------------------------------------------------------------------------------------------------------------------------------------------------------------------------------------------------------------------------------------------------------------------------------------------------------------------------------------------------|-----------|-------------|-------------|-----------|----------|------------|---------------|
|           |                                                                                                                                                                                                                                  | For this indicator to be scored, both guidelines should be followed, or it should be clear that the company approach is equivalent.<br><br>Note: within the General Principles for the Addition of Essential Nutrients to Foods, CAC/GL 9-1987, last revised on 2015, it is stated that “3.2.5 When competent national and/or regional authorities establish minimum amounts for the addition of essential nutrients to foods they should ensure that these amounts are significant and in line with the intended purpose as identified in 3.1.1. In determining significant amounts, they may also consider conditions of use for a ‘source’ claim in the Guidelines for Use of Nutrition and Health Claims (CAC/GL 23-1997).” Therefore, the use of nutrition or health claims on fortified products is still determined by the Guidelines for Use of Nutrition and Health Claims, CAC/GL 23-1997. |           |             |             |           |          |            |               |
| 189       | Has the company committed to increasing the number/percentage of healthy products in more prominent locations (e.g. store entrances, aisle ends, checkouts etc. and their online equivalents) compared to less healthy products? | Yes, specifically to drive sales of fruits and vegetables (fresh, dried, tinned/canned and frozen) and/or wholegrain varieties of products and/or other healthy products<br>Yes, to drive the sales of healthy products excluding fruit and vegetables<br>No /no information found<br><br>Online equivalents of prominent locations include entry pages, landing pages for other food categories, and shopping basket or payment pages – as indicated by the Department of Health and Social Care.                                                                                                                                                                                                                                                                                                                                                                                                   | ATNI UK   | 2           | 1           | 1         | 1        | 1          | 3             |
| 190       | Has the company committed to removing or reducing the number of less healthy items from at least one prominent location (e.g. store entrances, aisle ends, checkouts etc. and their online equivalents)?                         | Yes, removing all less healthy product categories<br>Yes, removing some but not all less healthy product categories<br>Yes, reducing the number of all less healthy product categories<br>Yes, reducing the number of some but not all product categories<br>No/no information found<br><br>For instance, this can be removing products high in fat, sugar and salt; having sugar-free/less healthy snack-free checkouts, etc.<br>Online equivalents of prominent locations include entry pages, landing pages for other food categories, and shopping basket or payment pages – as indicated by the Department of Health and Social Care                                                                                                                                                                                                                                                            | ATNI UK   | 2           | 1           | 1         | 1        | 1          | 3             |
| 191       | Has the company committed to using its NPM, or similar tool, to guide product positioning?                                                                                                                                       | Yes<br>No/no information found<br><br>Online equivalents of prominent locations include entry pages, landing pages for other food categories, and shopping basket or payment pages – as indicated by the Department of Health and Social Care.<br>Note that the Product Scope multiplier applies here. ATNI is interested to know whether there is a distinction between product-positioning decisions for own-brand and manufacturer-brand products.                                                                                                                                                                                                                                                                                                                                                                                                                                                | ATNI UK   | 1           | 2           | 1         | 1        | 1          | 3             |
| 192       | Has the company committed to using marketing and other promotional techniques to drive the sale of healthy products?                                                                                                             | Yes<br>No/no information found<br><br>Price-based promotions are covered in an earlier subsection. Promotional activities in this subsection include signage, trolley prompts, etc.                                                                                                                                                                                                                                                                                                                                                                                                                                                                                                                                                                                                                                                                                                                  | ATNI UK   | 3           | 1           | 1         | 1        | 1          | 3             |
| 193       | Has the company committed to using volume-based promotions for healthy products only?                                                                                                                                            | Yes<br>No/no information found<br>Not applicable                                                                                                                                                                                                                                                                                                                                                                                                                                                                                                                                                                                                                                                                                                                                                                                                                                                     | ATNI UK   | 1           | 2           | 2         | 1        | 1          | 3             |

| metric ID | Metric                                                                                                                                                                                             | Details for Metric use   Scoring Criteria                                                                                                                                                                                                                                                                                                                                                                                                                                                                                                                                                                                                                                                                                                                                                                                                           | Framework | Materiality | Objectivity | Alignment | Activity | Resolution | Verifiability |
|-----------|----------------------------------------------------------------------------------------------------------------------------------------------------------------------------------------------------|-----------------------------------------------------------------------------------------------------------------------------------------------------------------------------------------------------------------------------------------------------------------------------------------------------------------------------------------------------------------------------------------------------------------------------------------------------------------------------------------------------------------------------------------------------------------------------------------------------------------------------------------------------------------------------------------------------------------------------------------------------------------------------------------------------------------------------------------------------|-----------|-------------|-------------|-----------|----------|------------|---------------|
|           |                                                                                                                                                                                                    | As indicated by the Department for Health and Social Care, volume-based promotions (e.g. multi-buys) can cause a greater sales increase compared to price-based promotions.                                                                                                                                                                                                                                                                                                                                                                                                                                                                                                                                                                                                                                                                         |           |             |             |           |          |            |               |
| 194       | Has the company committed to using other shelf/in-store (and online equivalents) labelling to identify less healthy products and/or healthy products?                                              | Yes, for both healthy and less healthy products<br>Yes, for either healthy or less healthy products<br>No/no information found                                                                                                                                                                                                                                                                                                                                                                                                                                                                                                                                                                                                                                                                                                                      | ATNI UK   | 2           | 1           | 1         | 1        | 1          | 3             |
| 195       | Has the company committed not to run any in-store promotional campaigns/activities directed at children that involve any less healthy products, e.g. no give-aways, tie-ins, voucher schemes etc.? | Yes<br>No/no information found                                                                                                                                                                                                                                                                                                                                                                                                                                                                                                                                                                                                                                                                                                                                                                                                                      | ATNI UK   | 1           | 1           | 1         | 1        | 1          | 3             |
| 196       | Has the company committed to use in-store promotional campaigns/activities directed at children to promote healthy products?                                                                       | Yes<br>No/no information found                                                                                                                                                                                                                                                                                                                                                                                                                                                                                                                                                                                                                                                                                                                                                                                                                      | ATNI UK   | 1           | 1           | 1         | 1        | 1          | 3             |
| 197       | Is the company increasing the prominence of healthy products?                                                                                                                                      | Yes<br>No/no information found<br><br>Specifically improving the physical accessibility of its healthy products may be done by explicitly focusing on products that meet the company's healthy standard (related to nutrition criteria in its NPM), or by addressing the physical accessibility of healthy products relative to products not meeting healthy standards.<br>Examples that can be considered for scoring include:<br>• arrangements / incentives with manufacturers offering prominent shelf positions or favourable positions in the online store for its healthy products on a regular basis (not a one-off);<br>• data to demonstrate that all stores, including online, are provided with healthy options as standard; or<br>• data to demonstrate that stores in poor urban areas are provided with healthy options as standard. | ATNI UK   | 1           | 1           | 1         | 2        | 1          | 1             |
| 198       | Is the company removing less healthy items from prominent locations (e.g., store entrances, aisle ends, checkouts etc. and their online equivalents)?                                              | Evidence about all kinds of less healthy products<br>Evidence about confectionery only<br>No/no information found<br><br>Online equivalents of prominent locations include entry pages, landing pages for other food categories, and shopping basket or payment pages – as indicated by the Department of Health and Social Care.                                                                                                                                                                                                                                                                                                                                                                                                                                                                                                                   | ATNI UK   | 1           | 1           | 1         | 2        | 1          | 2             |
| 199       | Does the company provide any evidence of engaging with brand manufacturers to position healthy products in prominent locations?                                                                    | Yes<br>No/no information found                                                                                                                                                                                                                                                                                                                                                                                                                                                                                                                                                                                                                                                                                                                                                                                                                      | ATNI UK   | 1           | 1           | 1         | 2        | 1          | 1             |
| 200       | Is there evidence that the company has ceased running in-store promotional campaigns/activities that involve any less healthy products, e.g. no give-aways, tie-ins, voucher schemes etc?          | Evidence of ceasing such activity in respect of adults and children<br>Evidence of ceasing such activity in respect of children only<br>No/no information found                                                                                                                                                                                                                                                                                                                                                                                                                                                                                                                                                                                                                                                                                     | ATNI UK   | 2           | 1           | 1         | 3        | 1          | 2             |

| metric ID | Metric                                                                                                                                                                                                                                                                        | Details for Metric use   Scoring Criteria                                                                                                                                                                                                                                                                                                                                                                                                                                                                                                                                                                                                                                                                                                                                                                                                                                                                                                                                                                                                                                                                                                                                                                                                                                                                                                                                   | Framework | Materiality | Objectivity | Alignment | Activity | Resolution | Verifiability |
|-----------|-------------------------------------------------------------------------------------------------------------------------------------------------------------------------------------------------------------------------------------------------------------------------------|-----------------------------------------------------------------------------------------------------------------------------------------------------------------------------------------------------------------------------------------------------------------------------------------------------------------------------------------------------------------------------------------------------------------------------------------------------------------------------------------------------------------------------------------------------------------------------------------------------------------------------------------------------------------------------------------------------------------------------------------------------------------------------------------------------------------------------------------------------------------------------------------------------------------------------------------------------------------------------------------------------------------------------------------------------------------------------------------------------------------------------------------------------------------------------------------------------------------------------------------------------------------------------------------------------------------------------------------------------------------------------|-----------|-------------|-------------|-----------|----------|------------|---------------|
| 201       | Is there evidence that the company has used in-store or on-pack promotional campaigns/activities to promote healthy products?                                                                                                                                                 | Extensive and consistent promotions over the year<br>Limited/occasional<br>No/no information found                                                                                                                                                                                                                                                                                                                                                                                                                                                                                                                                                                                                                                                                                                                                                                                                                                                                                                                                                                                                                                                                                                                                                                                                                                                                          | ATNI UK   | 2           | 1           | 1         | 3        | 1          | 2             |
| 202       | Does the company provide evidence of using labelling on shelves/in-store to identify healthy/high in calories/sugar/less healthy products?                                                                                                                                    | Yes<br>No/no information found                                                                                                                                                                                                                                                                                                                                                                                                                                                                                                                                                                                                                                                                                                                                                                                                                                                                                                                                                                                                                                                                                                                                                                                                                                                                                                                                              | ATNI UK   | 1           | 2           | 1         | 3        | 1          | 2             |
| 203       | Does the company have a clearly articulated responsible marketing/advertising policy for all consumers including children?                                                                                                                                                    | Yes, for all consumers, specifically including children<br>Yes, without a specific section on children<br>No/no information found<br><br>This section relates principally to policies and commitments governing the companies' advertising and marketing on media, not in stores, which is covered by Topic 4.                                                                                                                                                                                                                                                                                                                                                                                                                                                                                                                                                                                                                                                                                                                                                                                                                                                                                                                                                                                                                                                              | ATNI UK   | 2           | 2           | 1         | 1        | 1          | 3             |
| 204       | Does the company's responsible marketing/advertising policy explicitly apply to the following media:                                                                                                                                                                          | All print media (newspapers, magazines, books and printed advertising in public places)<br>All broadcast media (traditional TV, radio)<br>All non-broadcast electronic and/or digital media (its own and third-party websites, social media, mobile and SMS marketing, native online marketing, games and apps, CDs/DVDs)<br>Sponsorship (e.g. of sporting, entertainment or cultural events or activities)<br>All additional forms of marketing (cinema, outdoor, product placement in movies, TV shows, etc.)<br>None/no information found<br><br>Tick all that apply.<br><br>The channel coverage of the responsible marketing policy (or policies) is assessed in this indicator, whether the policy covers only children, teens or all consumers. If different marketing policies exist for different audiences (for children, teens or all consumers), or for a different reason, differences in channel coverage apply between audiences, only those media are scored that are common to both policies.<br><br>The Advertising Standards Authority defines native advertising as "content that has been designed so it doesn't look out of place in the habitat within which it's being viewed. In this way, it goes beyond simply targeting consumers with ads relevant to the editorial they are viewing". For more information please refer to this ASA web page. | ATNI UK   | 2           | 2           | 1         | 1        | 1          | 3             |
| 205       | What age is used to define 'child' for marketing/advertising?                                                                                                                                                                                                                 | <18<br><16<br><12<br>Lower/not stated/no information found                                                                                                                                                                                                                                                                                                                                                                                                                                                                                                                                                                                                                                                                                                                                                                                                                                                                                                                                                                                                                                                                                                                                                                                                                                                                                                                  | ATNI UK   | 1           | 3           | 1         | 2        | 1          | 2             |
| 206       | Does the company commit to go beyond the Code of Non-broadcast Advertising and Direct & Promotional Marketing (CAP Code) in terms of the use of fantasy/cartoon/character in its marketing to children in relation to products classified as high in fat, salt and/or sugars? | Not to use fantasy/ cartoon/ character/ celebrity on any products on any forms of media (including on pack, in store and online)<br>Not to use fantasy/ cartoon/ character/ celebrity for some products only. And/or in some forms of media only<br>No/no information found<br><br>Tick all that apply.                                                                                                                                                                                                                                                                                                                                                                                                                                                                                                                                                                                                                                                                                                                                                                                                                                                                                                                                                                                                                                                                     | ATNI UK   | 1           | 3           | 3         | 1        | 1          | 3             |

| metric ID | Metric                                                                                                                                                                                                                      | Details for Metric use   Scoring Criteria                                                                                                                                                                                                                                                                                                                                                                                                                                                                                                                                                                                                                                                                                                                                                                                                                                                                                                                                                                                                                                                                                                                                                                                                                                                                                                                                                                                                                                                                                                                                  | Framework | Materiality | Objectivity | Alignment | Activity | Resolution | Verifiability |
|-----------|-----------------------------------------------------------------------------------------------------------------------------------------------------------------------------------------------------------------------------|----------------------------------------------------------------------------------------------------------------------------------------------------------------------------------------------------------------------------------------------------------------------------------------------------------------------------------------------------------------------------------------------------------------------------------------------------------------------------------------------------------------------------------------------------------------------------------------------------------------------------------------------------------------------------------------------------------------------------------------------------------------------------------------------------------------------------------------------------------------------------------------------------------------------------------------------------------------------------------------------------------------------------------------------------------------------------------------------------------------------------------------------------------------------------------------------------------------------------------------------------------------------------------------------------------------------------------------------------------------------------------------------------------------------------------------------------------------------------------------------------------------------------------------------------------------------------|-----------|-------------|-------------|-----------|----------|------------|---------------|
|           |                                                                                                                                                                                                                             | For more details, please refer to the UK Code of Non-broadcast Advertising and Direct & Promotional Marketing (CAP Code).                                                                                                                                                                                                                                                                                                                                                                                                                                                                                                                                                                                                                                                                                                                                                                                                                                                                                                                                                                                                                                                                                                                                                                                                                                                                                                                                                                                                                                                  |           |             |             |           |          |            |               |
| 207       | Does the company commit to go beyond the UK Code of Broadcast Advertising (BCAP Code) in respect of the media on which it markets to children in relation to products classified as high in fat, salt and/or sugars (HFSS): | <p>Not to advertise HFSS products at all, on any forms of media<br/>           Not to advertise HFSS products at all, on selected media<br/>           TV: Not to advertise these products before a 9pm watershed (or earlier) on all TV channels ahead of the ban<br/>           Digital marketing: To apply a 9pm watershed restriction (or earlier) on its advertising of HFSS products ahead of the ban<br/>           No commitment to go beyond the Code/no information found</p> <p>Tick options that apply.</p> <p>In July 2020 the UK government announced that it will ban the advertising of HFSS products being shown on TV and online before 9pm. The ban has not yet come into force.</p> <p>Digital marketing techniques encompass the insertion of advertising and other promotions in content that is accessible online and through digital devices. It includes specific types: native advertising, influencer marketing, advergames and immersive environments, branded environments, viral marketing, location targeting, sponsored search results, neuromarketing and sentiment analysis.</p> <p>The Advertising Standards Authority defines native advertising as “content that has been designed so it doesn’t look out of place in the habitat within which it’s being viewed. In this way, it goes beyond simply targeting consumers with ads relevant to the editorial they are viewing”. For more information please refer to this ASA web page.</p> <p>For more details, please refer to the UK Code of Broadcast Advertising (BCAP Code).</p> | ATNI UK   | 2           | 3           | 3         | 1        | 1          | 3             |
| 208       | Does the company commit not to sponsor materials, people or activities popular with children and/or adults except in conjunction with healthy products/products low in sugar/calories/salt/fat?                             | <p>Yes<br/>           No/no information found</p>                                                                                                                                                                                                                                                                                                                                                                                                                                                                                                                                                                                                                                                                                                                                                                                                                                                                                                                                                                                                                                                                                                                                                                                                                                                                                                                                                                                                                                                                                                                          | ATNI UK   | 1           | 2           | 1         | 1        | 1          | 3             |
| 209       | Does the company commit to align the portrayal of food in advertising with on-pack portion/serving size?                                                                                                                    | <p>Yes<br/>           No/no information</p> <p>Portion indicates the size of a product in single-portion packs. Serving size indicates the size of servings in multi-portion packs.</p> <p>For instance, the portrayal of a bowl of cereal in advertising should represent the on-pack serving size (e.g. about 25–30g).</p>                                                                                                                                                                                                                                                                                                                                                                                                                                                                                                                                                                                                                                                                                                                                                                                                                                                                                                                                                                                                                                                                                                                                                                                                                                               | ATNI UK   | 1           | 3           | 1         | 1        | 1          | 3             |
| 210       | Does the company commit to advertising a wider range of healthy products?                                                                                                                                                   | <p>Yes, more healthy packaged products<br/>           Yes, more fruit and veg<br/>           No/no information found</p>                                                                                                                                                                                                                                                                                                                                                                                                                                                                                                                                                                                                                                                                                                                                                                                                                                                                                                                                                                                                                                                                                                                                                                                                                                                                                                                                                                                                                                                   | ATNI UK   | 2           | 1           | 1         | 1        | 1          | 3             |
| 211       | Does the company commit to increasing the proportion of its advertising spending on                                                                                                                                         | <p>Yes, with a clear and timebound target<br/>           Yes, without a clear and timebound target<br/>           No/no information found</p>                                                                                                                                                                                                                                                                                                                                                                                                                                                                                                                                                                                                                                                                                                                                                                                                                                                                                                                                                                                                                                                                                                                                                                                                                                                                                                                                                                                                                              | ATNI UK   | 3           | 1           | 1         | 1        | 1          | 3             |



| metric ID | Metric                                                                                                                                                                          | Details for Metric use   Scoring Criteria                                                                                                                                                                                                                                                                                                                          | Framework | Materiality | Objectivity | Alignment | Activity | Resolution | Verifiability |
|-----------|---------------------------------------------------------------------------------------------------------------------------------------------------------------------------------|--------------------------------------------------------------------------------------------------------------------------------------------------------------------------------------------------------------------------------------------------------------------------------------------------------------------------------------------------------------------|-----------|-------------|-------------|-----------|----------|------------|---------------|
|           | healthy products relative to its overall advertising spending?                                                                                                                  |                                                                                                                                                                                                                                                                                                                                                                    |           |             |             |           |          |            |               |
| 212       | Can the company provide evidence (in the last three years) of (tick all that apply):                                                                                            | Its efforts to decrease advertising of less healthy food (e.g. decreasing ad spending on less healthy products)<br>Its efforts to put more emphasis on advertising healthy products, (e.g. increasing ad spending on healthy products)<br>No/no information found                                                                                                  | ATNI UK   | 3           | 1           | 1         | 2        | 1          | 2             |
| 213       | Does the company commission a third-party organisation to audit its compliance with its responsible marketing and advertising policy?                                           | Yes<br>No/no information found                                                                                                                                                                                                                                                                                                                                     | ATNI UK   | 1           | 2           | 1         | 2        | 1          | 2             |
| 214       | Does the company provide any evidence of sponsoring or funding initiatives promoting children and/or adults' healthy eating?                                                    | Yes<br>No/no information found                                                                                                                                                                                                                                                                                                                                     | ATNI UK   | 2           | 1           | 1         | 2        | 1          | 2             |
| 215       | Does the company commit to using colour-coded labelling on the front-of-pack on its own-brand products?                                                                         | Yes, for all relevant products<br>Yes, but not specified on what products<br>No/no information found                                                                                                                                                                                                                                                               | ATNI UK   | 1           | 2           | 1         | 1        | 1          | 3             |
| 216       | Does the company state that it will not place a health claim on a product unless it is healthy, as defined in a relevant nutrient profiling model (NPM)?                        | Yes, only when it meets the nutrition criteria of a government-endorsed NPM<br>Yes, only when it meets the nutrition criteria of its formal internal NPM<br>Yes, only when it meets the nutrition criteria of its own precursor to an NPM (or similar)<br>No/no information found                                                                                  | ATNI UK   | 3           | 2           | 2         | 1        | 1          | 3             |
| 217       | Can the company provide evidence of using colour-coded FOP labels (such as those described by the FSA) on its own-brand products?                                               | Yes<br>No/no information found<br><br>Please refer to the FSA Guide to creating a front of pack (FOP) nutrition label for pre-packed products sold through retail outlets for more information.                                                                                                                                                                    | ATNI UK   | 3           | 2           | 2         | 2        | 1          | 2             |
| 218       | For which products does the company provide online nutrition information, BOP and/or FOP?                                                                                       | All products, BOP and FOP (FOP where applicable)<br>All products, only BOP<br>Some products<br>None/no information found                                                                                                                                                                                                                                           | ATNI UK   | 2           | 2           | 1         | 3        | 1          | 2             |
| 219       | Does the company display FOP labels together with product pictures online to make them as accessible as they are in-store?<br><br>[UNSCORED] If so, how does the company do so? | Yes<br>No/no information found<br><br>Hover-over function<br>FOP label reproduced above/below/near the product picture<br>Other – please indicate                                                                                                                                                                                                                  | ATNI UK   | 2           | 2           | 1         | 3        | 1          | 2             |
| 220       | Which of the following statements apply to the company's FOP labelling policy?                                                                                                  | Apply IGD guidance on 'gold standard' labels fully<br>Always use energy + 4<br>Display of reference intake (RI) information<br>Display of typical energy per 100g/100ml<br>Use of FSA/DHSC traffic-light colour coding<br>None/no information found<br><br>Tick the first answer option OR all that apply.<br>Please refer to the FSA Guide to creating a front of | ATNI UK   | 3           | 2           | 3         | 1        | 1          | 3             |

| metric ID | Metric                                                                                                                                                                                                                                    | Details for Metric use   Scoring Criteria                                                                                                                                                                                                                                                                                                                                                                                                                                                                                                                                                                                          | Framework   | Materiality | Objectivity | Alignment | Activity | Resolution | Verifiability |
|-----------|-------------------------------------------------------------------------------------------------------------------------------------------------------------------------------------------------------------------------------------------|------------------------------------------------------------------------------------------------------------------------------------------------------------------------------------------------------------------------------------------------------------------------------------------------------------------------------------------------------------------------------------------------------------------------------------------------------------------------------------------------------------------------------------------------------------------------------------------------------------------------------------|-------------|-------------|-------------|-----------|----------|------------|---------------|
|           |                                                                                                                                                                                                                                           | <p>pack (FOP) nutrition label for pre-packed products sold through retail outlets for general guidelines on FOP labels.</p> <p>Please refer to IGD Report Designing, presenting and positioning front of pack nutrition labels - A best practice guide based on consumer research for industry best practice guidelines.</p> <p>Energy + 4 indicates: energy, fat, saturates, sugar, and salt.</p>                                                                                                                                                                                                                                 |             |             |             |           |          |            |               |
| 221       | Does the company have a filter function in its online platform to filter for healthy products?                                                                                                                                            | <p>Yes, a healthy filter or at least 3 nutrient-based filters<br/>           Yes, but only a maximum of 2 nutrient-based filters<br/>           No/no information</p> <p>Nutrient-based filters are, for instance filters that filter out products high in sugar and/or salt and/or calories etc. Nutrient-based filters used for allergenic nutrients (rather than for negative nutrients) will not be credited here.</p>                                                                                                                                                                                                         | ATNI UK     | 1           | 2           | 1         | 3        | 1          | 3             |
| 222       | Does the company commit to disclose the ingredients list on its products? (only applicable if not mandatory according to government policy)                                                                                               | <p>10: Yes, publicly available commitment to disclose ingredients on all products<br/>           7.5: Yes, commitment to disclose ingredients on all products, but commitment not publicly available<br/>           5: Yes, publicly available commitment to disclose ingredients on some (but not all) products<br/>           2.5: Yes, commitment to disclose ingredients on some (but not all) products, but commitment not publicly available<br/>           0: No commitment / no information available to the research team</p>                                                                                             | BIA-Obesity | 2           | 3           | 1         | 1        | 1          | 2             |
| 223       | Does the company commit to disclose nutrition information on its products on a 'per 100g/100mL' basis? What nutrition information does the company commit to providing? (only applicable if not mandatory according to government policy) | <p>10: Yes, publicly available commitment to disclose nutrition information on all products<br/>           7.5: Yes, commitment to disclose nutrition information on all products, but commitment not publicly available<br/>           5: Yes, publicly available commitment to disclose nutrition information on some (but not all) products<br/>           2.5: Yes, commitment to disclose nutrition information on some (but not all) products, but commitment not publicly available<br/>           0: No commitment / no information available to the research team</p> <p>part 2: [Information only, not to be scored]</p> | BIA-Obesity | 2           | 3           | 1         | 1        | 1          | 2             |
| 224       | Does the company commit to provide on-pack information on trans fat content? (only applicable if not mandatory according to government policy)                                                                                            | <p>2.5: Yes, on all relevant products<br/>           1: Yes, on some products<br/>           0: No commitment / no information available to the research team<br/>           N/A: if commitment to eliminate use of all industrially produced trans fat across portfolio</p>                                                                                                                                                                                                                                                                                                                                                       | BIA-Obesity | 1           | 3           | 1         | 1        | 1          | 3             |
| 225       | Does the company commit to provide on-pack information on free sugar content? (only applicable if not mandatory according to government policy)                                                                                           | <p>2.5: Yes, on all relevant products<br/>           1: Yes, on some products<br/>           0: No commitment / no information available to the research team</p>                                                                                                                                                                                                                                                                                                                                                                                                                                                                  | BIA-Obesity | 1           | 3           | 1         | 1        | 1          | 3             |
| 226       | Does the company provide nutrition information online?                                                                                                                                                                                    | <p>10: Yes, comprehensive nutrition information (calories, sodium, saturated fat, total fat, sugar) for all relevant products, including on a per 100g/100ml basis<br/>           7.5: Yes, comprehensive nutrition information (calories, sodium, saturated fat, total fat, sugar) for most (&gt;60%) products, or comprehensive nutrition information for all products per serving only<br/>           5: Comprehensive nutrition information for some (&gt;50%) products</p>                                                                                                                                                    | BIA-Obesity | 3           | 3           | 1         | 3        | 3          | 3             |

| metric ID | Metric                                                                                                                                                                                                                                                                                                                                                                                                                                                                                                             | Details for Metric use   Scoring Criteria                                                                                                                                                                                                                                                                                                                                                                                                                                                                                                                                                                                                 | Framework   | Materiality | Objectivity | Alignment | Activity | Resolution | Verifiability |
|-----------|--------------------------------------------------------------------------------------------------------------------------------------------------------------------------------------------------------------------------------------------------------------------------------------------------------------------------------------------------------------------------------------------------------------------------------------------------------------------------------------------------------------------|-------------------------------------------------------------------------------------------------------------------------------------------------------------------------------------------------------------------------------------------------------------------------------------------------------------------------------------------------------------------------------------------------------------------------------------------------------------------------------------------------------------------------------------------------------------------------------------------------------------------------------------------|-------------|-------------|-------------|-----------|----------|------------|---------------|
|           |                                                                                                                                                                                                                                                                                                                                                                                                                                                                                                                    | 2.5: Limited nutrition information (i.e. does not include calories, sodium, saturated fat, total fat or sugar) for some (>50%) products<br>0: <50% of products or no information                                                                                                                                                                                                                                                                                                                                                                                                                                                          |             |             |             |           |          |            |               |
| 227       | Does the company have a policy to provide information on food composition to national authorities, on request? (if applicable, e.g., information has been requested by government)                                                                                                                                                                                                                                                                                                                                 | 5: Yes, all products (published or not published)<br>2.5: Yes, some products<br>0: No policy / no information available to the research team                                                                                                                                                                                                                                                                                                                                                                                                                                                                                              | BIA-Obesity | 1           | 2           | 1         | 1        | 1          | 3             |
| 228       | IF A VOLUNTARY GOVERNMENT-ENDORSED FOP NUTRITION LABELLING SCHEME EXISTS: Does the company have a published commitment to rolling out the government-endorsed FOP labelling scheme?                                                                                                                                                                                                                                                                                                                                | 10: Yes, with implementation plan across all product categories (published or unpublished)<br>7.5: Yes, with implementation plan across a selection of product categories (published or unpublished)<br>5: Yes, but with no specific implementation plan (published or unpublished)<br>0: No                                                                                                                                                                                                                                                                                                                                              | BIA-Obesity | 3           | 2           | 1         | 1        | 1          | 3             |
| 229       | IF THERE IS NO GOVERNMENT-ENDORSED FOP NUTRITION LABELLING SCHEME OR GOVERNMENT-ENDORSED SCHEME DOES NOT MEET BENCHMARKS OF BEST PRACTICE: Does the company commit to use a FOP labelling system?                                                                                                                                                                                                                                                                                                                  | 10: Interpretive information (such as, stars, traffic lights, warning labels, etc.), applied across all product categories<br>7.5: Symbols or logos that indicate healthy products, applied across all product categories<br>5: Numeric information with % of recommended daily intake, applied across all product categories<br>2.5: Numeric information on levels of key nutrients, not showing % of recommended daily intake, applied across all product categories<br>0: No FOP labelling used                                                                                                                                        | BIA-Obesity | 1           | 2           | 1         | 1        | 1          | 3             |
| 230       | IF THERE IS NO GOVERNMENT-ENDORSED FOP NUTRITION LABELLING SCHEME OR GOVERNMENT-ENDORSED SCHEME DOES NOT MEET BENCHMARKS OF BEST PRACTICE: What system / criteria (e.g., product classification system or nutrient profiling system) does the company use to classify the healthiness of products for the purposes of FOP nutrition labelling?<br><br>If a proprietary product classification system has been developed, which products, nutrients and food characteristics are covered, and what are the details? | 10: Adopted official national or regional classification system (developed by WHO, PAHO, national government, etc.)<br>5: Developed own system that has been validated and shows strong alignment with official national (or regional) classification systems / dietary guidelines, published in peer-reviewed literature<br>2.5: Developed own system that has been validated and shows alignment with official national (or regional) classification systems / dietary guidelines, not published in peer-reviewed literature<br>0: No information / poor alignment / does not have a system<br><br>[Information only, not to be scored] | BIA-Obesity | 3           | 2           | 2         | 2        | 1          | 2             |
| 231       | Does the company publish its policy position (in relation to government policy) on front of pack nutrition labelling?                                                                                                                                                                                                                                                                                                                                                                                              | 10: Yes, on own website<br>5: Yes, on industry association website<br>0: Not publicly available                                                                                                                                                                                                                                                                                                                                                                                                                                                                                                                                           | BIA-Obesity | 1           | 3           | 2         | 2        | 1          | 3             |
| 232       | Does the company's policy position (in relation to government policy) support WHO's                                                                                                                                                                                                                                                                                                                                                                                                                                | 10: Strong support (with a focus on "interpretive" to mean readily understandable and providing easy comparison of products e.g. using traffic light colours or stars to compare products for those with low nutritional literacy; broadly implemented)                                                                                                                                                                                                                                                                                                                                                                                   | BIA-Obesity | 3           | 3           | 3         | 1        | 1          | 3             |

| metric ID | Metric                                                                                                                                                                                                                                                                                                                                                                                                                                           | Details for Metric use   Scoring Criteria                                                                                                                                                                                                                                                                                                                                                                                                                                                                                                                                                                                                 | Framework   | Materiality | Objectivity | Alignment | Activity | Resolution | Verifiability |
|-----------|--------------------------------------------------------------------------------------------------------------------------------------------------------------------------------------------------------------------------------------------------------------------------------------------------------------------------------------------------------------------------------------------------------------------------------------------------|-------------------------------------------------------------------------------------------------------------------------------------------------------------------------------------------------------------------------------------------------------------------------------------------------------------------------------------------------------------------------------------------------------------------------------------------------------------------------------------------------------------------------------------------------------------------------------------------------------------------------------------------|-------------|-------------|-------------|-----------|----------|------------|---------------|
|           | position on front of pack nutrition labelling, as articulated in the WHO Report of the Commission on Ending Childhood Obesity – Recommendation 1.7)?                                                                                                                                                                                                                                                                                             | 5: Weak support (e.g., supports scheme that only provides limited interpretive information, such as % Daily Intake Guide for energy content only)<br>0: No details available<br>-5: Somewhat opposed (e.g., opposes some aspects of implementation of an interpretive scheme)<br>-10: Strongly opposed (e.g., opposes interpretive labelling)                                                                                                                                                                                                                                                                                             |             |             |             |           |          |            |               |
| 233       | Does the company state that it will place a health claim on a product (or use a health claim as part of product advertising) only when the product is 'healthy', and in compliance with Codex? (only applicable if not mandatory according to government policy)                                                                                                                                                                                 | 10: Yes, commitment is published<br>5: Yes, commitment is not published<br>0: No commitment/ no information available to the research team                                                                                                                                                                                                                                                                                                                                                                                                                                                                                                | BIA-Obesity | 3           | 2           | 2         | 1        | 1          | 2             |
| 234       | Does the company state that it will place a nutrition claim on a product (or use a nutrition claim as part of product advertising) only when the product is 'healthy'? (only applicable if not mandatory according to government policy)                                                                                                                                                                                                         | 10: Yes, commitment is published<br>5: Yes, commitment is not published<br>0: No commitment/ no information available to the research team                                                                                                                                                                                                                                                                                                                                                                                                                                                                                                | BIA-Obesity | 3           | 2           | 1         | 1        | 1          | 2             |
| 235       | What system / criteria (e.g., product classification system or nutrient profiling system) does the company use to classify the healthiness of products for the purposes of health and/or nutrition claims? (only applicable if not mandatory according to government policy)<br><br>If a proprietary product classification system has been developed, which products, nutrients and food characteristics are covered, and what are the details? | 10: Adopted official national or regional classification system (developed by WHO, PAHO, national government, etc.)<br>5: Developed own system that has been validated and shows strong alignment with official national (or regional) classification systems / dietary guidelines, published in peer-reviewed literature<br>2.5: Developed own system that has been validated and shows alignment with official national (or regional) classification systems / dietary guidelines, not published in peer-reviewed literature<br>0: No information / poor alignment / does not have a system<br><br>[Information only, not to be scored] | BIA-Obesity | 3           | 2           | 3         | 2        | 1          | 2             |
| 236       | Does the company have an explicit policy to reduce the exposure of children to unhealthy food marketing on broadcast media (TV, radio)?                                                                                                                                                                                                                                                                                                          | 10: Yes, national policy and noted on company website / annual reports<br>7.5: Yes, global policy and noted on company website / annual reports<br>5: Yes, national policy but not noted on company website / annual reports OR national policy and noted on industry association website<br>2.5: Yes, global policy but not noted on company website / annual reports<br>0: No policy/ no information available to the research team                                                                                                                                                                                                     | BIA-Obesity | 1           | 2           | 1         | 1        | 1          | 2             |
| 237       | To what age group(s) does the broadcast marketing policy apply?                                                                                                                                                                                                                                                                                                                                                                                  | 10: 18 years and under<br>8: 16 years and under<br>6: 14 years and under<br>4: 12 years and under<br>2: Under 10 years                                                                                                                                                                                                                                                                                                                                                                                                                                                                                                                    | BIA-Obesity | 1           | 3           | 1         | 1        | 1          | 2             |

| metric ID | Metric                                                                                                                                                                                                                                                                           | Details for Metric use   Scoring Criteria                                                                                                                                                                                                                                                                                                                                                                                                                                                                                                                                                                    | Framework   | Materiality | Objectivity | Alignment | Activity | Resolution | Verifiability |
|-----------|----------------------------------------------------------------------------------------------------------------------------------------------------------------------------------------------------------------------------------------------------------------------------------|--------------------------------------------------------------------------------------------------------------------------------------------------------------------------------------------------------------------------------------------------------------------------------------------------------------------------------------------------------------------------------------------------------------------------------------------------------------------------------------------------------------------------------------------------------------------------------------------------------------|-------------|-------------|-------------|-----------|----------|------------|---------------|
|           |                                                                                                                                                                                                                                                                                  | 0: No policy / no information                                                                                                                                                                                                                                                                                                                                                                                                                                                                                                                                                                                |             |             |             |           |          |            |               |
| 238       | How is the 'target audience' or 'audience exposed' defined?                                                                                                                                                                                                                      | 10: Time-based restrictions, based on children's peak viewing times (e.g., no advertising before 9:00pm)<br>5: Based on a percentage of the children's audience that are likely to be viewing (e.g. if >10% of total children are watching)<br>2.5: Based on a percentage of the audience that are likely to be children (e.g., if >10% of audience are children)<br>1: Children's programmes only<br>0: No explicit threshold / definition                                                                                                                                                                  | BIA-Obesity | 1           | 3           | 1         | 2        | 1          | 2             |
| 239       | Does the company have an explicit policy to reduce the exposure of children to unhealthy food marketing on non-broadcast media (including websites, DVDs/games, social media, print media, product placement, outdoor marketing, in store marketing / point of sales marketing)? | 10: Yes, national policy and noted on company website / annual reports<br>7.5: Yes, global policy and noted on company website / annual reports<br>5: Yes, national policy but not noted on company website / annual reports OR national policy and noted on industry association website<br>2.5: Yes, global policy but not noted on company website / annual reports<br>0: No policy/ no information available to the research team<br>[Information only – what specific media channels are included]                                                                                                      | BIA-Obesity | 1           | 2           | 1         | 1        | 1          | 2             |
| 240       | To what age group(s) does the non-broadcast marketing policy apply?                                                                                                                                                                                                              | 10: 18 years and under<br>8: 16 years and under<br>6: 14 years and under<br>4: 12 years and under<br>2: Under 10 years<br>0: No policy / no information                                                                                                                                                                                                                                                                                                                                                                                                                                                      | BIA-Obesity | 1           | 3           | 1         | 1        | 1          | 2             |
| 241       | Does the company commit not to sponsor children's sporting, cultural or other activities using unhealthy brands (foods or company brands)?<br>(only applicable if not mandatory according to government policy)                                                                  | 10: Yes, comprehensive commitment including products and brands<br>5: Yes, comprehensive commitment including products only (brands still permitted)<br>2.5: Some commitments in the area, including some events or some forms of sponsorship<br>0: No commitment / no information available to the research team                                                                                                                                                                                                                                                                                            | BIA-Obesity | 1           | 2           | 2         | 1        | 1          | 3             |
| 242       | Does the company commit not to use marketing in settings where children gather using unhealthy brands (foods or company brands)?<br>(only applicable if not mandatory according to government policy)                                                                            | (Can be multiple)<br>2: Commits IN early childcare settings and primary schools (children up to age 11)<br>2: Commits NEAR (e.g. within 500m) of early childcare settings and primary schools (children up to age 11)<br>2: Commits IN secondary schools (children between age 12 and 18)<br>2: Commits NEAR (e.g., within 500m) of secondary schools (children between age 12 and 18)<br>2: Commits in other places where children gather (family and child clinics, paediatric services or other health facilities, sporting or recreation centres, or sporting or cultural events held at those premises) | BIA-Obesity | 1           | 1           | 1         | 1        | 1          | 3             |
| 243       | Does the company pledge not to use celebrities in marketing of products to children other than those that meet the company's healthy standard?<br>(only applicable if not mandatory according to government policy)                                                              | 5: All forms of marketing<br>2.5: Some forms of marketing (e.g., excludes packaging) or applies only to those celebrities that appeal primarily to children<br>0: No policy / no information available to the research team                                                                                                                                                                                                                                                                                                                                                                                  | BIA-Obesity | 2           | 2           | 1         | 1        | 1          | 3             |

| metric ID | Metric                                                                                                                                                                                                                                                                                                                                                                | Details for Metric use   Scoring Criteria                                                                                                                                                                                                                                                                                                                                                                                                                                                                                                                                                     | Framework   | Materiality | Objectivity | Alignment | Activity | Resolution | Verifiability |
|-----------|-----------------------------------------------------------------------------------------------------------------------------------------------------------------------------------------------------------------------------------------------------------------------------------------------------------------------------------------------------------------------|-----------------------------------------------------------------------------------------------------------------------------------------------------------------------------------------------------------------------------------------------------------------------------------------------------------------------------------------------------------------------------------------------------------------------------------------------------------------------------------------------------------------------------------------------------------------------------------------------|-------------|-------------|-------------|-----------|----------|------------|---------------|
| 244       | Does the company pledge not to use fantasy and animation characters with a strong appeal to children in marketing of products other than those that meet the company's healthy standard?<br>(only applicable if not mandatory according to government policy)                                                                                                         | 10: All forms of marketing (includes no use of characters with strong appeal to children across all forms of marketing)<br>5: Some forms of marketing (includes no use of characters with strong appeal to children across some forms of marketing)<br>2.5: Some restriction on use of fantasy/animation character in marketing (e.g. only applies to characters that appeal primarily to children or does not apply to licensed/third party characters)<br>0: No policy / no information available to the research team                                                                      | BIA-Obesity | 2           | 2           | 1         | 1        | 1          | 3             |
| 245       | Does the company commit to not use premium offers (e.g., promotional toys, games, vouchers and competitions) in marketing of products (including as part of children's meals) other than those that meet the company's healthy standard?<br>(only applicable if not mandatory according to government policy)                                                         | 5: All forms of marketing<br>2.5: Some forms of marketing (e.g., excludes packaging)<br>0: No commitment / no information available to the research team                                                                                                                                                                                                                                                                                                                                                                                                                                      | BIA-Obesity | 2           | 2           | 1         | 1        | 1          | 3             |
| 246       | Does the company audit its compliance with its policy on marketing to children at the national/country level?                                                                                                                                                                                                                                                         | 5: Yes, the policy is audited by an independently appointed third party<br>2.5: Yes, the policy independently audited<br>1: No, the policy is not independently audited<br>0: No auditing is conducted<br><br>DIVIDE POINTS BY HALF IF THE POLICY IS ONLY AUDITED AT THE GLOBAL LEVEL, AND NOT AT THE NATIONAL/COUNTRY LEVEL                                                                                                                                                                                                                                                                  | BIA-Obesity | 1           | 2           | 1         | 2        | 1          | 2             |
| 247       | What system / criteria (e.g., product classification system or nutrient profiling system) does the company use to classify the healthiness of products for the purposes of promotion to children?<br><br>If a proprietary product classification system has been developed, which products, nutrients and food characteristics are covered, and what are the details? | 10: Adopted official national or regional classification system (developed by WHO, PAHO, national government, etc.)<br>5: Developed own system that has been validated and shows strong alignment with official national (or regional) classification systems / dietary guidelines, published in peer-reviewed literature<br>2.5: Developed own system that has been validated and shows alignment with official national (or regional) classification systems / dietary guidelines, not published in peer-reviewed literature<br>0: No information / poor alignment / does not have a system | BIA-Obesity | 2           | 2           | 3         | 2        | 1          | 2             |
| 248       | Does the company's policy position support WHO's position on government-led policy action related to reducing the exposure of children and adolescents to, and the power of, the marketing of unhealthy foods, as articulated in the WHO Global Action Plan for NCDs and other key WHO documents (such as the Report of the Commission on Ending Childhood Obesity)?  | 10: Strong support (e.g., includes support for government-led action of marketing to children and adolescents, related to power and exposure)<br>5: Weak support (e.g., includes support for government-led action of marketing to children or adolescents, related to either power or exposure.)<br>0: No details available<br>-5: Somewhat opposed (e.g., opposes government-led efforts to restrict some aspects of promotion to children / adolescents)<br>-10: Strongly opposed (e.g., opposes any actions to reduce promotion to children)                                              | BIA-Obesity | 2           | 2           | 3         | 1        | 1          | 3             |

| metric ID | Metric                                                                                                                                                                                                                                                                                                                                                                                                                                                                                                                                                                                                                                                  | Details for Metric use   Scoring Criteria                                                                                                                                                                                                                                                                                                                                                                                                                                                                                                                                        | Framework   | Materiality | Objectivity | Alignment | Activity | Resolution | Verifiability |
|-----------|---------------------------------------------------------------------------------------------------------------------------------------------------------------------------------------------------------------------------------------------------------------------------------------------------------------------------------------------------------------------------------------------------------------------------------------------------------------------------------------------------------------------------------------------------------------------------------------------------------------------------------------------------------|----------------------------------------------------------------------------------------------------------------------------------------------------------------------------------------------------------------------------------------------------------------------------------------------------------------------------------------------------------------------------------------------------------------------------------------------------------------------------------------------------------------------------------------------------------------------------------|-------------|-------------|-------------|-----------|----------|------------|---------------|
|           | According to the World Health Assembly resolution WHA63.14, marketing policy should aim to reduce the impact on children of marketing of foods high in saturated fats, trans-fatty acids, free sugars or salt by reducing both exposure of children to, and power of, marketing of foods high in these nutrients, with uniform implementation across all implementing bodies. The policy should include settings where children gather. The government should be the key stakeholder in developing the policy including implementation, monitoring and evaluation, and enforcement systems should be in place including clear definitions of sanctions. |                                                                                                                                                                                                                                                                                                                                                                                                                                                                                                                                                                                  |             |             |             |           |          |            |               |
| 249       | Does the company commit to disclose nutrition information on its menus?                                                                                                                                                                                                                                                                                                                                                                                                                                                                                                                                                                                 | 10: Yes, relates to all menu items and commitment is publicly available<br>7.5: Yes, relates to all menu items, commitment is not publicly available<br>5: Yes, relates to some menu items and commitment is publicly available<br>2.5: Yes, relates to some menu items, commitment is not publicly available<br>0: No commitment / no information available to the research team                                                                                                                                                                                                | BIA-Obesity | 2           | 2           | 1         | 1        | 1          | 2             |
| 250       | What nutrition information does the company commit to providing on menus?                                                                                                                                                                                                                                                                                                                                                                                                                                                                                                                                                                               | Up to 10 points maximum:<br>5: Energy / calories<br>5: Symbol or logo indicating 'healthy' items according to overall nutritional profile<br>2: Sodium/salt<br>2: Saturated fat<br>2: Total fat<br>2: Trans fat<br>2: Sugar                                                                                                                                                                                                                                                                                                                                                      | BIA-Obesity | 3           | 3           | 1         | 1        | 1          | 3             |
| 251       | Is the nutrition information on menus presented in the same size and font as price?                                                                                                                                                                                                                                                                                                                                                                                                                                                                                                                                                                     | 5: Yes<br>0: No / no information<br>N/A where mandated by government policy                                                                                                                                                                                                                                                                                                                                                                                                                                                                                                      | BIA-Obesity | 1           | 3           | 1         | 3        | 1          | 2             |
| 252       | If energy / calorie information is displayed on menus, does the company provide a contextual statement regarding the number of calories that should be consumed in a day for the average adult to maintain a healthy weight?                                                                                                                                                                                                                                                                                                                                                                                                                            | 5: Yes<br>0: No / no information<br>N/A where mandated by government policy                                                                                                                                                                                                                                                                                                                                                                                                                                                                                                      | BIA-Obesity | 1           | 3           | 1         | 3        | 1          | 2             |
| 253       | Does the company have a policy that they will provide comprehensive nutrition information in-store?                                                                                                                                                                                                                                                                                                                                                                                                                                                                                                                                                     | 10: Yes, comprehensive nutrition information (kj/calories, sodium, saturated fat, trans fat, total fat, sugar) for all regular menu items on a per 100g/100ml basis<br>7.5: Yes, comprehensive nutrition information (kj/calories, sodium, saturated fat, trans fat, total fat, sugar) for all regular menu items<br>5: Comprehensive nutrition information for some regular menu items / commitment to provide some nutrition information in-store<br>2.5: Limited nutrition information for regular menu items<br>0: No policy / no information available to the research team | BIA-Obesity | 3           | 3           | 1         | 1        | 1          | 3             |

| metric ID | Metric                                                                                                                                                                                                                                   | Details for Metric use   Scoring Criteria                                                                                                                                                                                                                                                                                                                                                                                                                                                                                                                                                                    | Framework   | Materiality | Objectivity | Alignment | Activity | Resolution | Verifiability |
|-----------|------------------------------------------------------------------------------------------------------------------------------------------------------------------------------------------------------------------------------------------|--------------------------------------------------------------------------------------------------------------------------------------------------------------------------------------------------------------------------------------------------------------------------------------------------------------------------------------------------------------------------------------------------------------------------------------------------------------------------------------------------------------------------------------------------------------------------------------------------------------|-------------|-------------|-------------|-----------|----------|------------|---------------|
| 254       | Does the company publish its policy position (in relation to preferred government policy, where government policy exists) on menu labelling?                                                                                             | 10: Yes, on own website<br>5: Yes, on industry association website<br>0: Not publicly available                                                                                                                                                                                                                                                                                                                                                                                                                                                                                                              | BIA-Obesity | 1           | 3           | 2         | 1        | 1          | 3             |
| 255       | Does the company commit not to sponsor children's sporting, cultural or other activities using unhealthy brands (foods or company brands)?                                                                                               | 10: Yes, comprehensive commitment including products and brands<br>5: Yes, comprehensive commitment including products only (brands still permitted)<br>2.5: Some commitments in the area, including some events or some forms of sponsorship<br>0: No commitment / no information available to the research team                                                                                                                                                                                                                                                                                            | BIA-Obesity | 1           | 2           | 1         | 1        | 1          | 3             |
| 256       | Does the company commit not to use marketing in settings where children gather using unhealthy brands (foods or company brands)?                                                                                                         | (Can be multiple)<br>2: Commits IN early childcare settings and primary schools (children up to age 11)<br>2: Commits NEAR (e.g. within 500m) of early childcare settings and primary schools (children up to age 11)<br>2: Commits IN secondary schools (children between age 12 and 18)<br>2: Commits NEAR (e.g., within 500m) of secondary schools (children between age 12 and 18)<br>2: Commits in other places where children gather (family and child clinics, paediatric services or other health facilities, sporting or recreation centres, or sporting or cultural events held at those premises) | BIA-Obesity | 1           | 1           | 1         | 1        | 1          | 3             |
| 257       | Does the company pledge not to use celebrities in marketing of products to children other than those that meet the company's healthy standard?                                                                                           | 5: All forms of marketing<br>2.5: Some forms of marketing (e.g., excludes packaging) or applies only to those celebrities that appeal primarily to children<br>0: No policy / no information available to the research team                                                                                                                                                                                                                                                                                                                                                                                  | BIA-Obesity | 2           | 2           | 1         | 1        | 1          | 3             |
| 258       | Does the company pledge not to use fantasy and animation characters with a strong appeal to children in marketing of products other than those that meet the company's healthy standard?                                                 | 10: All forms of marketing (includes no use of characters with strong appeal to children across all forms of marketing)<br>5: Some forms of marketing (includes no use of characters with strong appeal to children across some forms of marketing)<br>2.5: Some restriction on use of fantasy/animation character in marketing (e.g. only applies to characters that appeal primarily to children or does not apply to licensed/third party characters)<br>0: No / no information                                                                                                                           | BIA-Obesity | 2           | 2           | 1         | 1        | 1          | 3             |
| 259       | Does the company commit to not use premium offers (e.g., promotional toys, games, vouchers and competitions) in marketing of products (including as part of children's meals) other than those that meet the company's healthy standard? | 5: All forms of marketing<br>2.5: Some forms of marketing (e.g., excludes packaging)<br>0: No commitment / no information available to the research team                                                                                                                                                                                                                                                                                                                                                                                                                                                     | BIA-Obesity | 2           | 2           | 1         | 1        | 1          | 3             |
| 260       | Does the company commit to only advertise or display 'healthy' sides and 'healthy' drinks in children's combination meals in restaurants (for example, on menus and menu boards or in advertisements in restaurants)?                    | 10: Yes, commits to only advertising both healthy sides and healthy drinks for children's meals or does not advertise children's meals<br>5: Yes, commits to only advertising either healthy sides or health drinks<br>0: No commitment / no information available to the research team                                                                                                                                                                                                                                                                                                                      | BIA-Obesity | 2           | 2           | 1         | 1        | 1          | 3             |
| 261       | Does the company's policy position support WHO's position on government-led policy action related to reducing the exposure of children and adolescents to, and the power of, the marketing of unhealthy foods, as                        | 10: Strong support (e.g., includes support for government-led action of marketing to children and adolescents, related to power and exposure)<br>5: Weak support (e.g., includes support for government-led action of marketing to children or adolescents, related to either power or exposure,)<br>0: No details available                                                                                                                                                                                                                                                                                 | BIA-Obesity | 2           | 2           | 3         | 2        | 1          | 3             |



| metric ID | Metric                                                                                                                                                                                                                                                                                                                                                                                                                                                                                                                                                                                                                                                                                                                                                                                                                                                                                                                                                                                                        | Details for Metric use   Scoring Criteria                                                                                                                                                                                                                                                                                                         | Framework   | Materiality | Objectivity | Alignment | Activity | Resolution | Verifiability |
|-----------|---------------------------------------------------------------------------------------------------------------------------------------------------------------------------------------------------------------------------------------------------------------------------------------------------------------------------------------------------------------------------------------------------------------------------------------------------------------------------------------------------------------------------------------------------------------------------------------------------------------------------------------------------------------------------------------------------------------------------------------------------------------------------------------------------------------------------------------------------------------------------------------------------------------------------------------------------------------------------------------------------------------|---------------------------------------------------------------------------------------------------------------------------------------------------------------------------------------------------------------------------------------------------------------------------------------------------------------------------------------------------|-------------|-------------|-------------|-----------|----------|------------|---------------|
|           | articulated in the WHO Global Action Plan for NCDs and other key WHO documents (such as the Report of the Commission on Ending Childhood Obesity)?<br>According to the World Health Assembly resolution WHA63.14, marketing policy should aim to reduce the impact on children of marketing of foods high in saturated fats, trans-fatty acids, free sugars or salt by reducing both exposure of children to, and power of, marketing of foods high in these nutrients, with uniform implementation across all implementing bodies. The policy should include settings where children gather. The government should be the key stakeholder in developing the policy including implementation, monitoring and evaluation, and enforcement systems should be in place including clear definitions of sanctions.<br>Additional details available at: <a href="http://apps.who.int/iris/bitstream/10665/44416/1/9789241500210_eng.pdf">http://apps.who.int/iris/bitstream/10665/44416/1/9789241500210_eng.pdf</a> | -5: Somewhat opposed (e.g., opposes government-led efforts to restrict some aspects of promotion to children / adolescents)<br>-10: Strongly opposed (e.g., opposes any actions to reduce promotion to children)                                                                                                                                  |             |             |             |           |          |            |               |
| 262       | Does the company make a clear and specific commitment to dedicate a minimum amount or proportion of shelf space or floor space to healthy products?                                                                                                                                                                                                                                                                                                                                                                                                                                                                                                                                                                                                                                                                                                                                                                                                                                                           | 10: Clear commitment for whole business, and is published<br>7.5: Clear commitment for whole business, is not published<br>5: Broad commitment, is published<br>2.5: Broad commitment, is not published<br>0: No commitment / no information available to the research team                                                                       | BIA-Obesity | 2           | 2           | 1         | 1        | 1          | 2             |
| 263       | Does the company make a clear and specific commitment to dedicate a maximum amount or proportion of shelf space or floor space to less healthy products?                                                                                                                                                                                                                                                                                                                                                                                                                                                                                                                                                                                                                                                                                                                                                                                                                                                      | 10: Clear commitment for whole business, and is published<br>7.5: Clear commitment for whole business, is not published<br>5: Broad commitment, is published<br>2.5: Broad commitment, is not published<br>0: No commitment / no information available to the research team                                                                       | BIA-Obesity | 2           | 2           | 1         | 1        | 1          | 2             |
| 264       | Does the company have a policy that checkouts are free from unhealthy items (including confectionery, chocolate and soft drinks)?                                                                                                                                                                                                                                                                                                                                                                                                                                                                                                                                                                                                                                                                                                                                                                                                                                                                             | 10: No unhealthy items, applies to all checkouts<br>5: No unhealthy items, applies to some checkouts OR limit unhealthy items, applies to all checkouts<br>2.5: Limit unhealthy items, applies to some checkouts<br>2.5: Actively considering/engaged in healthy checkout options<br>0: No policy / no information available to the research team | BIA-Obesity | 2           | 2           | 1         | 1        | 1          | 2             |
| 265       | Does the company have a published position on the placement of unhealthy items (such as confectionery, chocolate and soft drinks) at end of aisle displays or other high-traffic areas?                                                                                                                                                                                                                                                                                                                                                                                                                                                                                                                                                                                                                                                                                                                                                                                                                       | 10: No unhealthy items, applies to all high-traffic areas<br>7.5: No unhealthy items, applies to some high-traffic areas<br>5: Limit unhealthy items, applies to all high-traffic areas<br>2.5: Limit unhealthy items, applies to some high-traffic areas<br>0: No commitment / no information available to the research team                     | BIA-Obesity | 2           | 2           | 1         | 1        | 1          | 3             |
| 266       | Does the company commit to disclose the ingredients list on its own brand products?                                                                                                                                                                                                                                                                                                                                                                                                                                                                                                                                                                                                                                                                                                                                                                                                                                                                                                                           | 10: Yes, publicly available commitment to disclose ingredients on all products                                                                                                                                                                                                                                                                    | BIA-Obesity | 2           | 3           | 1         | 1        | 1          | 2             |

| metric ID | Metric                                                                                                                                                                                                         | Details for Metric use   Scoring Criteria                                                                                                                                                                                                                                                                                                                                                                                                                                                                                                                                                                                  | Framework   | Materiality | Objectivity | Alignment | Activity | Resolution | Verifiability |
|-----------|----------------------------------------------------------------------------------------------------------------------------------------------------------------------------------------------------------------|----------------------------------------------------------------------------------------------------------------------------------------------------------------------------------------------------------------------------------------------------------------------------------------------------------------------------------------------------------------------------------------------------------------------------------------------------------------------------------------------------------------------------------------------------------------------------------------------------------------------------|-------------|-------------|-------------|-----------|----------|------------|---------------|
|           |                                                                                                                                                                                                                | 7.5: Yes, commitment to disclose ingredients on all products, but commitment not publicly available<br>5: Yes, publicly available commitment to disclose ingredients on some (but not all) products<br>2.5: Yes, commitment to disclose ingredients on some (but not all) products, but commitment not publicly available<br>0: No commitment / no information available to the research team                                                                                                                                                                                                                              |             |             |             |           |          |            |               |
| 267       | Does the company commit to disclose nutrition information on its own brand products on a 'per 100g/100mL' basis?<br><br>What nutrition information does the company commit to providing on own brand products? | 10: Yes, publicly available commitment to disclose nutrition information on all products<br>7.5: Yes, commitment to disclose nutrition information on all products, but commitment not publicly available<br>5: Yes, publicly available commitment to disclose nutrition information on some (but not all) products<br>2.5: Yes, commitment to disclose nutrition information on some (but not all) products, but commitment not publicly available<br>0: No commitment / no information available to the research team<br><br>[Information only, not to be scored]                                                        | BIA-Obesity | 1           | 3           | 1         | 1        | 1          | 2             |
| 268       | Does the company commit to provide on-pack information on trans fat content for own-brand products?                                                                                                            | 2.5: Yes, on all relevant products<br>1: Yes, on some products<br>0: No commitment / no information available to the research team<br>N/A: if commitment to eliminate use of all industrially produced trans fat across portfolio                                                                                                                                                                                                                                                                                                                                                                                          | BIA-Obesity | 1           | 3           | 1         | 1        | 1          | 3             |
| 269       | Does the company commit to provide on-pack information on free sugar content for own-brand products?                                                                                                           | 2.5: Yes, on all relevant products<br>1: Yes, on some products<br>0: No commitment / no information available to the research team                                                                                                                                                                                                                                                                                                                                                                                                                                                                                         | BIA-Obesity | 1           | 3           | 1         | 1        | 1          | 3             |
| 270       | Does the company provide nutrition information online for own brand products?                                                                                                                                  | 10: Yes, comprehensive nutrition information (calories, sodium, saturated fat, total fat, sugar) for most (>80%) products, including on a per 100g/100ml basis<br>7.5: Yes, comprehensive nutrition information (calories, sodium, saturated fat, total fat, sugar) for most (>80%) products, OR comprehensive nutrition information for all products per serving only<br>5: Comprehensive nutrition information for some (>50%) products<br>2.5: Limited nutrition information (i.e. does not include calories, sodium, saturated fat, total fat or sugar) for some (>50%) items<br>0: <50% of products or no information | BIA-Obesity | 3           | 3           | 1         | 3        | 3          | 3             |
| 271       | Does the company have a policy to provide information on food composition to national authorities, on request?                                                                                                 | 5: Yes, all products (published or not published)<br>2.5: Yes, some products<br>0: No policy / no information available to the research team                                                                                                                                                                                                                                                                                                                                                                                                                                                                               | BIA-Obesity | 1           | 2           | 1         | 1        | 1          | 3             |
| 272       | Does the company have a published commitment to rolling out the government-endorsed FOP labelling scheme on own brand products?                                                                                | 10: Yes, with implementation plan across all product categories (published or unpublished)<br>7.5: Yes, with implementation plan across a selection of product categories (published or unpublished)<br>5: Yes, but with no specific implementation plan (published or unpublished)<br>0: No commitment / no information available to the research team                                                                                                                                                                                                                                                                    | BIA-Obesity | 3           | 2           | 3         | 1        | 1          | 3             |
| 273       | Does the company commit to use a FOP labelling system on own brand products?                                                                                                                                   | 10: Interpretive information (such as, stars, traffic lights, warning labels, etc.), applied across all product categories<br>7.5: Symbols or logos that indicate healthy products, applied across all product categories<br>5: Numeric information with % of recommended daily intake, applied across all product categories<br>2.5: Numeric information on levels of key nutrients, not showing % of recommended daily intake, applied across all product categories                                                                                                                                                     | BIA-Obesity | 3           | 2           | 1         | 1        | 1          | 3             |

| metric ID | Metric                                                                                                                                                                                                                                                                                                                                                                                                          | Details for Metric use   Scoring Criteria                                                                                                                                                                                                                                                                                                                                                                                                                                                                                                                                                                                                          | Framework   | Materiality | Objectivity | Alignment | Activity | Resolution | Verifiability |
|-----------|-----------------------------------------------------------------------------------------------------------------------------------------------------------------------------------------------------------------------------------------------------------------------------------------------------------------------------------------------------------------------------------------------------------------|----------------------------------------------------------------------------------------------------------------------------------------------------------------------------------------------------------------------------------------------------------------------------------------------------------------------------------------------------------------------------------------------------------------------------------------------------------------------------------------------------------------------------------------------------------------------------------------------------------------------------------------------------|-------------|-------------|-------------|-----------|----------|------------|---------------|
|           |                                                                                                                                                                                                                                                                                                                                                                                                                 | 0: No FOP labelling used<br>DIVIDE POINTS IN HALF IF ONLY USED FOR SOME PRODUCTS / CATEGORIES                                                                                                                                                                                                                                                                                                                                                                                                                                                                                                                                                      |             |             |             |           |          |            |               |
| 274       | What system / criteria (e.g., product classification system or nutrient profiling system) does the company use to classify the healthiness of products for the purposes of FOP nutrition labelling on own brand products?<br><br>If a proprietary product classification system has been developed, which products, nutrients and food characteristics are covered, and what are the details?                   | 10: Adopted official national or regional classification system (developed by WHO, PAHO, national government, etc.)<br>5: Developed own system that has been validated and shows strong alignment with official national (or regional) classification systems / dietary guidelines, published in peer-reviewed literature<br>2.5: Developed own system that has been validated and shows moderate alignment with official national (or regional) classification systems / dietary guidelines, not published in peer-reviewed literature<br>0: No information / poor alignment / does not have a system<br><br>[Information only, not to be scored] | BIA-Obesity | 3           | 2           | 3         | 2        | 1          | 2             |
| 275       | Does the company publish its policy position (in relation to government policy) on front of pack nutrition labelling?                                                                                                                                                                                                                                                                                           | 10: Yes, on own website<br>5: Yes, on industry association website<br>2.5: Policy position made available to INFORMAS team<br>0: Not publicly available                                                                                                                                                                                                                                                                                                                                                                                                                                                                                            | BIA-Obesity | 1           | 3           | 2         | 1        | 1          | 3             |
| 276       | Does the company's policy position (in relation to government policy) support WHO's position on front of pack nutrition labelling, as articulated in the WHO Report of the Commission on Ending Childhood Obesity – Recommendation 1.7)?<br>(Statement on Recommendation 1.7: Implement interpretive front-of-pack labelling, supported by public education of both adults and children for nutrition literacy) | 10: Strong support (with a focus on "interpretive" to mean readily understandable and providing easy comparison of products e.g. using traffic light colours or stars to compare products for those with low nutritional literacy; broadly implemented)<br>5: Weak support (e.g., supports scheme that only provides limited interpretive information, such as % Daily Intake Guide for energy content only)<br>0: No details available<br>-5: Somewhat opposed (e.g., opposes some aspects of implementation of an interpretive scheme)<br>-10: Strongly opposed (e.g., opposes interpretive labelling)                                           | BIA-Obesity | 3           | 3           | 3         | 1        | 1          | 3             |
| 277       | Does the company state that it will place a health claim on an own-brand product (or use a health claim as part of own-brand product advertising) only when the product is 'healthy', and in compliance with Codex?                                                                                                                                                                                             | 10: Yes, commitment is published<br>5: Yes, commitment is not published<br>0: No commitment /no information available to the research team                                                                                                                                                                                                                                                                                                                                                                                                                                                                                                         | BIA-Obesity | 3           | 2           | 2         | 1        | 1          | 2             |
| 278       | Does the company state that it will place a nutrition claim on an own-brand product (or use a nutrition claim as part of own-brand product advertising) only when the product is 'healthy'?                                                                                                                                                                                                                     | 10: Yes, commitment is published<br>5: Yes, commitment is not published<br>0: No commitment / no information available to the research team                                                                                                                                                                                                                                                                                                                                                                                                                                                                                                        | BIA-Obesity | 3           | 2           | 1         | 1        | 1          | 3             |
| 279       | What system / criteria (e.g., product classification system or nutrient profiling system) does the company use to classify the healthiness of own-brand products for the purposes of health and/or nutrition claims?                                                                                                                                                                                            | 10: Adopted official national or regional classification system (developed by WHO, PAHO, national government, etc.)<br>5: Developed own system that has been validated and shows strong alignment with official national (or regional) classification systems / dietary guidelines, published in peer-reviewed literature<br>2.5: Developed own system that has been validated and shows moderate alignment with official national (or regional) classification systems / dietary guidelines, not published in peer-reviewed literature                                                                                                            | BIA-Obesity | 3           | 2           | 3         | 2        | 1          | 2             |

| metric ID | Metric                                                                                                                                                                                                                   | Details for Metric use   Scoring Criteria                                                                                                                                                                                                                                                                                                                                                                                                                                                                                                                                                                                                                                                                                                                                                                                                                                                                                                                                   | Framework   | Materiality | Objectivity | Alignment | Activity | Resolution | Verifiability |
|-----------|--------------------------------------------------------------------------------------------------------------------------------------------------------------------------------------------------------------------------|-----------------------------------------------------------------------------------------------------------------------------------------------------------------------------------------------------------------------------------------------------------------------------------------------------------------------------------------------------------------------------------------------------------------------------------------------------------------------------------------------------------------------------------------------------------------------------------------------------------------------------------------------------------------------------------------------------------------------------------------------------------------------------------------------------------------------------------------------------------------------------------------------------------------------------------------------------------------------------|-------------|-------------|-------------|-----------|----------|------------|---------------|
|           | If a proprietary product classification system has been developed, which products, nutrients and food characteristics are covered, and what are the details?                                                             | 0: No information / poor alignment / does not have a system<br><br>[Information only, not to be scored]                                                                                                                                                                                                                                                                                                                                                                                                                                                                                                                                                                                                                                                                                                                                                                                                                                                                     |             |             |             |           |          |            |               |
| 280       | Does the company use shelf tags that provide summary nutrition information (e.g. Guiding Stars, Health Star Rating, nutritioniQ, NuVal)?                                                                                 | 10: Yes, labelling system used for all product categories, classification based on official national or regional classification system (developed by WHO, PAHO, national government, etc.)<br>7.5: Yes, labelling system used for some product categories, classification based on official national or regional classification system (developed by WHO, PAHO, national government, etc.)<br>5: Yes, labelling system used for all product categories, classification based on own system that has been validated and shows strong alignment with official national (or regional) classification systems / dietary guidelines, published in peer-reviewed literature<br>2.5: Yes, labelling system used for some product categories, classification based on own system that has been validated and shows strong / moderate alignment with official national (or regional) classification systems / dietary guidelines, not published in peer-reviewed literature<br>0: No | BIA-Obesity | 2           | 3           | 3         | 2        | 1          | 3             |
| 281       | Does the company have an ongoing nutrition/healthy eating education program in-store? (e.g., dietitians in stores, nutrition education materials, etc.)                                                                  | 5: Yes, in all/most stores<br>2.5: Seasonal /intermittent programs only, or only selected stores<br>1: Actively considering/engaged in options for nutrition/healthy eating education programs<br>0: No                                                                                                                                                                                                                                                                                                                                                                                                                                                                                                                                                                                                                                                                                                                                                                     | BIA-Obesity | 1           | 2           | 1         | 2        | 1          | 3             |
| 282       | Does the company commit to disclose nutrition information (e.g., on menus) for takeaway or ready-to-eat foods that are prepared on site?                                                                                 | 10: Yes, relates to all menu items and commitment is publicly available<br>7.5: Yes, relates to all menu items, commitment is not publicly available<br>5: Yes, relates to some menu items and commitment is publicly available<br>2.5: Yes, relates to some menu items, commitment is not publicly available<br>0: No commitment / no information available to the research team                                                                                                                                                                                                                                                                                                                                                                                                                                                                                                                                                                                           | BIA-Obesity | 1           | 2           | 1         | 1        | 1          | 3             |
| 283       | What nutrition information does the company commit to providing (e.g., on menus) for takeaway or ready-to-eat foods that are prepared on site?                                                                           | Up to 10 points maximum:<br>5: Energy / calories<br>5: Symbol or logo indicating 'healthy' items<br>2: Sodium/salt<br>2: Saturated fat<br>2: Total fat<br>2: Trans fat<br>2: Sugar                                                                                                                                                                                                                                                                                                                                                                                                                                                                                                                                                                                                                                                                                                                                                                                          | BIA-Obesity | 2           | 2           | 1         | 1        | 1          | 3             |
| 284       | Is the nutrition information (e.g., on menus) for takeaway or ready-to-eat foods that are prepared on site presented in the same size and font as price?                                                                 | 5: Yes<br>0: No                                                                                                                                                                                                                                                                                                                                                                                                                                                                                                                                                                                                                                                                                                                                                                                                                                                                                                                                                             | BIA-Obesity | 1           | 3           | 1         | 2        | 1          | 3             |
| 285       | If energy / calorie information is displayed, does the company provide a contextual statement regarding the number of kJ / calories that should be consumed in a day for the average adult to maintain a healthy weight? | 5: Yes<br>0: No                                                                                                                                                                                                                                                                                                                                                                                                                                                                                                                                                                                                                                                                                                                                                                                                                                                                                                                                                             | BIA-Obesity | 1           | 3           | 1         | 2        | 1          | 3             |
| 286       | Does the company publish its policy position (in relation to government policy if government policy exists) on menu labelling?                                                                                           | 10: Yes, on own website<br>5: Yes, on industry association website<br>2.5: Policy position made available to INFORMAS team                                                                                                                                                                                                                                                                                                                                                                                                                                                                                                                                                                                                                                                                                                                                                                                                                                                  | BIA-Obesity | 1           | 3           | 2         | 1        | 1          | 3             |

| metric ID | Metric                                                                                                                                                                                                                                                                                                                                                                                | Details for Metric use   Scoring Criteria                                                                                                                                                                                                                                                                                                                                                                                                                                                                                                                                                                                                 | Framework   | Materiality | Objectivity | Alignment | Activity | Resolution | Verifiability |
|-----------|---------------------------------------------------------------------------------------------------------------------------------------------------------------------------------------------------------------------------------------------------------------------------------------------------------------------------------------------------------------------------------------|-------------------------------------------------------------------------------------------------------------------------------------------------------------------------------------------------------------------------------------------------------------------------------------------------------------------------------------------------------------------------------------------------------------------------------------------------------------------------------------------------------------------------------------------------------------------------------------------------------------------------------------------|-------------|-------------|-------------|-----------|----------|------------|---------------|
|           |                                                                                                                                                                                                                                                                                                                                                                                       | 0: Not publicly available                                                                                                                                                                                                                                                                                                                                                                                                                                                                                                                                                                                                                 |             |             |             |           |          |            |               |
| 287       | Does the company commit to not use premium offers (e.g., promotional toys, games, vouchers and competitions) in marketing of products other than those that meet the company's healthy standard?                                                                                                                                                                                      | 5: All forms of marketing<br>2.5: Some forms of marketing (e.g., excludes packaging)<br>0: No commitment / no information available to the research team                                                                                                                                                                                                                                                                                                                                                                                                                                                                                  | BIA-Obesity | 2           | 2           | 1         | 1        | 1          | 3             |
| 288       | What system / criteria (e.g., product classification system or nutrient profiling system) does the company use to classify the healthiness of products for the purposes of promotion to children and adolescents?<br><br>If a proprietary product classification system has been developed, which products, nutrients and food characteristics are covered, and what are the details? | 10: Adopted official national or regional classification system (developed by WHO, PAHO, national government, etc.)<br>5: Developed own system that has been validated and shows strong alignment with official national (or regional) classification systems / dietary guidelines, published in peer-reviewed literature<br>2.5: Developed own system that has been validated and shows alignment with official national (or regional) classification systems / dietary guidelines, not published in peer-reviewed literature<br>0: No information / poor alignment / does not have a system<br><br>[Information only, not to be scored] | BIA-Obesity | 2           | 2           | 3         | 2        | 1          | 2             |
| 289       | Does the company's policy position support WHO's position on government-led policy action related to reducing the exposure of children and adolescents to, and the power of, the marketing of unhealthy foods, as articulated in the WHO Global Action Plan for NCDs and other key WHO documents (such as the Report of the Commission on Ending Childhood Obesity)?                  | 10: Strong support (e.g., includes support for government-led action of marketing to children and adolescents, related to power and exposure)<br>5: Weak support (e.g., includes support for government-led action of marketing to children or adolescents, related to either power or exposure,)<br>0: No details available<br>-5: Somewhat opposed (e.g., opposes government-led efforts to restrict some aspects of promotion to children / adolescents)<br>-10: Strongly opposed (e.g., opposes any actions to reduce promotion to children)                                                                                          | BIA-Obesity | 2           | 2           | 3         | 1        | 1          | 3             |
| 290       | Does the company have a marketing policy to reduce the power and exposure of all consumers to unhealthy food marketing?                                                                                                                                                                                                                                                               | 5: Yes, and noted on company website / annual reports<br>2.5 Yes, but not noted on company website / annual reports<br>0: No policy / no information available to the research team                                                                                                                                                                                                                                                                                                                                                                                                                                                       | BIA-Obesity | 3           | 2           | 1         | 1        | 1          | 2             |
| 291       | To which media / settings does the marketing policy (related to all consumers) apply?                                                                                                                                                                                                                                                                                                 | (Can be multiple)<br>5: Broadcast media (TV, Radio)<br>5: Non-broadcast media (including websites, DVDs/games, social media, print media, product placement, outdoor marketing)                                                                                                                                                                                                                                                                                                                                                                                                                                                           | BIA-Obesity | 2           | 3           | 1         | 1        | 1          | 2             |
| 292       | Does the company have a policy to limit their in-store promotion of unhealthy products?                                                                                                                                                                                                                                                                                               | 10: Yes, published policy commits to only promote healthy products in-store<br>7.5: Yes, published policy commits to ensuring that a minimum proportion of in-store promotion is for healthy products<br>5: Policy exists, but not published<br>0: No policy / no information available to the research team                                                                                                                                                                                                                                                                                                                              | BIA-Obesity | 2           | 2           | 1         | 1        | 1          | 2             |
| 293       | Does the company have a policy on the proportion of healthy (compared with unhealthy foods) foods promoted in their regular catalogues/circulars?                                                                                                                                                                                                                                     | 10: Yes, published policy commits to only promote healthy products in regular catalogues/circulars<br>7.5: Yes, published policy commits to ensuring that a minimum proportion of products promoted in regular catalogues/circulars is for healthy products<br>5: Policy exists, but not published<br>0: No policy / no information available to the research team                                                                                                                                                                                                                                                                        | BIA-Obesity | 2           | 1           | 1         | 1        | 1          | 2             |

| metric ID | Metric                                                                                                                                                                                                                                                                                                                                                                                                                                                            | Details for Metric use   Scoring Criteria                                                                                                                                                                                                                                                                                                                                                                                                                                                                                                                                                                                                 | Framework   | Materiality | Objectivity | Alignment | Activity | Resolution | Verifiability |
|-----------|-------------------------------------------------------------------------------------------------------------------------------------------------------------------------------------------------------------------------------------------------------------------------------------------------------------------------------------------------------------------------------------------------------------------------------------------------------------------|-------------------------------------------------------------------------------------------------------------------------------------------------------------------------------------------------------------------------------------------------------------------------------------------------------------------------------------------------------------------------------------------------------------------------------------------------------------------------------------------------------------------------------------------------------------------------------------------------------------------------------------------|-------------|-------------|-------------|-----------|----------|------------|---------------|
| 294       | Does the company have a policy to link rewards programs or loyalty programs to healthy food items?                                                                                                                                                                                                                                                                                                                                                                | 5: Yes, published policy commits to link rewards / loyalty schemes to healthy food products<br>2.5: Yes, published policy commits to link a proportion of rewards / loyalty schemes to healthy food products / not published<br>0: No policy / no information available to the research team                                                                                                                                                                                                                                                                                                                                              | BIA-Obesity | 1           | 1           | 1         | 1        | 1          | 2             |
| 295       | Does the company have a policy to ensure that in-store product presentations, product giveaways or tastings are for healthy products (including giveaways to children)?                                                                                                                                                                                                                                                                                           | 5: All presentations, product giveaways or tastings must be for healthy products<br>2.5: Some presentations or tastings (e.g. those aimed at children) must be for healthy products<br>0: No policy / no information available to the research team                                                                                                                                                                                                                                                                                                                                                                                       | BIA-Obesity | 1           | 2           | 1         | 1        | 1          | 3             |
| 296       | Does the company audit its compliance with its policy on marketing to all consumers at the national/country level?                                                                                                                                                                                                                                                                                                                                                | 5: Yes, the policy is independently audited<br>2.5: No, the policy is not independently audited<br>0: No auditing is conducted<br>DIVIDE POINTS BY HALF IF THE POLICY IS ONLY AUDITED AT THE GLOBAL LEVEL, AND NOT AT THE NATIONAL/COUNTRY LEVEL                                                                                                                                                                                                                                                                                                                                                                                          | BIA-Obesity | 1           | 2           | 1         | 2        | 1          | 2             |
| 297       | What system / criteria (e.g., product classification system or nutrient profiling system) does the company use to classify the healthiness of products for the purposes of product promotion to all consumers (e.g. in-store catalogues, brochures, flyers, shelf tags, promotional posters)?<br><br>If a proprietary product classification system has been developed, which products, nutrients and food characteristics are covered, and what are the details? | 10: Adopted official national or regional classification system (developed by WHO, PAHO, national government, etc.)<br>5: Developed own system that has been validated and shows strong alignment with official national (or regional) classification systems / dietary guidelines, published in peer-reviewed literature<br>2.5: Developed own system that has been validated and shows alignment with official national (or regional) classification systems / dietary guidelines, not published in peer-reviewed literature<br>0: No information / poor alignment / does not have a system<br><br>[Information only, not to be scored] | BIA-Obesity | 3           | 2           | 3         | 2        | 1          | 2             |
| 298       | Whether each of the following types of information is required by the organization's procedures for product and service information and labeling:<br>i. The sourcing of components of the product or service;<br>ii. Content, particularly with regard to substances that might produce an environmental or social impact;<br>iii. Safe use of the product or service;<br>iv. Disposal of the product and environmental or social impacts;<br>v. Other (explain). |                                                                                                                                                                                                                                                                                                                                                                                                                                                                                                                                                                                                                                           | GRI         | 1           | 2           | 1         | 2        | 1          | 2             |
| 299       | Percentage of significant product or service categories covered by and assessed for compliance with the organization's procedures:<br>i. The sourcing of components of the product or service;                                                                                                                                                                                                                                                                    |                                                                                                                                                                                                                                                                                                                                                                                                                                                                                                                                                                                                                                           | GRI         | 1           | 2           | 1         | 2        | 3          | 1             |

| metric ID | Metric                                                                                                                                                                                                                                           | Details for Metric use   Scoring Criteria                                                                                                                                                                                                                                                                                                                                                                                                                                                                                                                                                                                                                                                                                                                                                                                                                                                                                                                                                                                                 | Framework | Materiality | Objectivity | Alignment | Activity | Resolution | Verifiability |
|-----------|--------------------------------------------------------------------------------------------------------------------------------------------------------------------------------------------------------------------------------------------------|-------------------------------------------------------------------------------------------------------------------------------------------------------------------------------------------------------------------------------------------------------------------------------------------------------------------------------------------------------------------------------------------------------------------------------------------------------------------------------------------------------------------------------------------------------------------------------------------------------------------------------------------------------------------------------------------------------------------------------------------------------------------------------------------------------------------------------------------------------------------------------------------------------------------------------------------------------------------------------------------------------------------------------------------|-----------|-------------|-------------|-----------|----------|------------|---------------|
|           | ii. Content, particularly with regard to substances that might produce an environmental or social impact;<br>iii. Safe use of the product or service;<br>iv. Disposal of the product and environmental or social impacts;<br>v. Other (explain). |                                                                                                                                                                                                                                                                                                                                                                                                                                                                                                                                                                                                                                                                                                                                                                                                                                                                                                                                                                                                                                           |           |             |             |           |          |            |               |
| 300       | Total number of incidents of non-compliance with regulations and/or voluntary codes concerning product and service information and labeling                                                                                                      | stratification of non-compliance by incidents: i. resulting in a fine or penalty; ii. resulting in a warning; iii. non-compliance with voluntary codes. Exclude incidents of non-compliance in which the organization was determined not to be at fault; if applicable, identify any incidents of non-compliance that relate to events in periods prior to the reporting period. If the organization has not identified any non-compliance with regulations and/or voluntary codes, a brief statement of this fact is sufficient.                                                                                                                                                                                                                                                                                                                                                                                                                                                                                                         | GRI       | 1           | 2           | 2         | 3        | 3          | 2             |
| 301       | Total number of incidents of non-compliance with regulations and/or voluntary codes concerning marketing communications, including advertising, promotion, and sponsorship                                                                       | stratification of non-compliance by incidents: i. resulting in a fine or penalty; ii. resulting in a warning; iii. non-compliance with voluntary codes. Exclude incidents of non-compliance in which the organization was determined not to be at fault; if applicable, identify any incidents of non-compliance that relate to events in periods prior to the reporting period. If the organization has not identified any non-compliance with regulations and/or voluntary codes, a brief statement of this fact is sufficient.                                                                                                                                                                                                                                                                                                                                                                                                                                                                                                         | GRI       | 1           | 2           | 2         | 3        | 3          | 2             |
| 302       | Policies and practices on communication to consumers about ingredients and nutritional information beyond legal requirements                                                                                                                     | 1) identify regulatory labeling requirements relevant to the product market. 2) identify product information practices on ingredients and nutritional information beyond legal requirements. 3) identify for those products with consumer labels: ingredients lists and key nutrient information used. 4) identify consumer access points (e.g. websites, consumer hotlines) where one may find extensive quantifiable nutrition information regarding key nutrients and ingredients in products intended for consumption by an individual. 5) identify policies used for the communication of: artificial food coloring, food additives/enhancers such as MSG, GMOs, artificial sweeteners, preservatives, allergens, food fortification. 6) identify policies used for the definition of nutrient and health claims and other claims on food products (light, low calorie, heart healthy, etc.). 7) report policies and practices on communication to consumers about ingredients and nutritional information beyond legal requirements | GRI-Food  | 2           | 2           | 1         | 2        | 2          | 2             |
| 303       | Company has a target for, and reports on, the % of menu items or products with intuitive front-of-package or (restaurants and caterers) consumer-facing nutrition labels (ideal 100%)                                                            | For supermarkets this relates to intuitive, front-of-package labeling (in store and online). For the out of home sector it relates to menus (onsite or online). For a maximum score transparency is required for the methodology used for labelling.<br><br>Scoring guidelines for quantitative metrics with specific targets:<br>3: Company has a clear target and is reporting against the target<br>2: Company reports performance data but not a target, or has a target but is not reporting against the target<br>1: Company recognises the issue and has taken limited or isolated action<br>0: No evidence is found that a company recognises the issue or is taking action                                                                                                                                                                                                                                                                                                                                                       | PUP       | 1           | 2           | 1         | 3        | 3          | 3             |
| 304       | The company's marketing strategy prioritises healthy foods, especially when marketing to children                                                                                                                                                | For a maximum score companies should disclose the proportion of marketing budget allocated to healthy products or menus. Evidence of strategic prioritisation of marketing of healthy food to children achieve a score of 2; evidence of initiatives such as individual price promotions, campaigns and a policy that adheres to international marketing guidelines achieve a score of 1.<br><br>Scoring guidelines for quantitative metrics with specific targets:<br>3: Company has a clear target and is reporting against the target                                                                                                                                                                                                                                                                                                                                                                                                                                                                                                  | PUP       | 3           | 2           | 1         | 2        | 3          | 2             |

| metric ID | Metric                                                                                                                             | Details for Metric use   Scoring Criteria                                                                                                                                                                                                                                                                                                                                                                                                                                                                                                                                                                                                                                                                                                                                                                                                                                                                                                                                                                                                                                                                                                                                                                                                                                                                                                                                                                                                                                                                                                                                                                                                                                                                                                                                                                                                                                                                                                                                                                                                                                                                                                                                                                                                                                                                                                                                                                                                                                                                                                                                                                                                                                                                                                        | Framework | Materiality | Objectivity | Alignment | Activity | Resolution | Verifiability |
|-----------|------------------------------------------------------------------------------------------------------------------------------------|--------------------------------------------------------------------------------------------------------------------------------------------------------------------------------------------------------------------------------------------------------------------------------------------------------------------------------------------------------------------------------------------------------------------------------------------------------------------------------------------------------------------------------------------------------------------------------------------------------------------------------------------------------------------------------------------------------------------------------------------------------------------------------------------------------------------------------------------------------------------------------------------------------------------------------------------------------------------------------------------------------------------------------------------------------------------------------------------------------------------------------------------------------------------------------------------------------------------------------------------------------------------------------------------------------------------------------------------------------------------------------------------------------------------------------------------------------------------------------------------------------------------------------------------------------------------------------------------------------------------------------------------------------------------------------------------------------------------------------------------------------------------------------------------------------------------------------------------------------------------------------------------------------------------------------------------------------------------------------------------------------------------------------------------------------------------------------------------------------------------------------------------------------------------------------------------------------------------------------------------------------------------------------------------------------------------------------------------------------------------------------------------------------------------------------------------------------------------------------------------------------------------------------------------------------------------------------------------------------------------------------------------------------------------------------------------------------------------------------------------------|-----------|-------------|-------------|-----------|----------|------------|---------------|
|           |                                                                                                                                    | 2: Company reports performance data but not a target, or has a target but is not reporting against the target<br>1: Company recognizes the issue and has taken limited or isolated action<br>0: No evidence is found that a company recognizes the issue or is taking action                                                                                                                                                                                                                                                                                                                                                                                                                                                                                                                                                                                                                                                                                                                                                                                                                                                                                                                                                                                                                                                                                                                                                                                                                                                                                                                                                                                                                                                                                                                                                                                                                                                                                                                                                                                                                                                                                                                                                                                                                                                                                                                                                                                                                                                                                                                                                                                                                                                                     |           |             |             |           |          |            |               |
| 305       | Percentage of advertising impressions (1) made on children and (2) made on children promoting products that met dietary guidelines | <p>An advertising impression is a measure of the number of times an advertisement is seen, heard, watched or read. Advertising impressions include, but are not limited to: those made through media such as television, radio, print, the Internet (company-owned or third-party websites), mobile apps, interactive games (including advergames), video games, computer games, DVDs and other video formats, word-of-mouth, and licensed characters, celebrity and movie tie-ins.<br/>Children defined as age 12 and under.</p> <p>The number of advertising impressions made on children is calculated as the expected share of children in the audience (viewers, listeners, readers, or visitors) at the time of the media multiplied by the expected total number of advertising impressions made, regardless of whether the advertising is primarily directed to children. For example, the 35% threshold use in the CFBAI Program and Core Principles Statement, 4th edition is not applicable to the above calculation of advertising impressions made on children.</p> <p>The entity shall disclose the percentage of advertising impressions made on children that promote products which meet national dietary guidelines for children. National dietary guidelines are defined as international, national, regional, or industry guidelines or criteria developed to promote healthy diets among children. National dietary guidelines for children include: China National Dietary Guideline for School Children, EU Food and Nutrition Policy for Schools, USDA Nutritional Standards in the National School Lunch and School Breakfast Programs, and other guidelines provided by national governmental agencies or regulators that contain daily nutritional values for children and are substantially equivalent to the guidelines referenced above.</p> <p>The percentage is calculated as the number of advertising impressions made on children that promote products that national dietary guidelines for children divided by the total number of advertising impressions made on children.</p> <p>The entity shall disclose its methodology for collecting data and estimating the number of advertising impressions made on children, where reasonable estimation methods include, but are not limited to: gross rating points and target ratios to determine impressions from TV, radio, print advertising; average visits per month, average page visits per month, and targeted index by age for company-owned websites; total number of advertising impressions viewed and child audience share on third-party websites, mobile apps, interactive games (including advergames), video games, and computer games.</p> | SASB      | 2           | 2           | 3         | 3        | 3          | 1             |
| 306       | Number of incidents of non-compliance with industry or regulatory labeling and/or marketing codes                                  | <p>The entity shall disclose the total number of substantial incidents of non-compliance with labeling and/or marketing-related regulatory code(s), statute(s), or other requirements.</p> <p>Labeling- and/or marketing-related non-compliance incidents include those with products with labels that are misbranded or use deceptive acts of advertising. The scope of labeling- and/or marketing-related non-compliance incidents includes but are not limited to, US FDA Untitled Letters and Warning Letters, US FTC issued cease-and-desist orders, civil penalties, and corrective advertising remedies (and non-US equivalents for all of above). Examples of labeling- and/or marketing-related regulatory code(s), statute(s), or other requirement(s) include, but</p>                                                                                                                                                                                                                                                                                                                                                                                                                                                                                                                                                                                                                                                                                                                                                                                                                                                                                                                                                                                                                                                                                                                                                                                                                                                                                                                                                                                                                                                                                                                                                                                                                                                                                                                                                                                                                                                                                                                                                                | SASB      | 1           | 3           | 3         | 3        | 3          | 2             |



| metric ID | Metric                                                                                                                               | Details for Metric use   Scoring Criteria                                                                                                                                                                                                                                                                                                                                                                                                                                                                                                                                                                                                                                                                                                                                                                                                                                                                                                                                                                                                                                                                                                                                                                                                                                                                                                                                                                                                                                                                                                                                                                                                                                                                                                                                                                                                                                                                                                                                                                                                     | Framework | Materiality | Objectivity | Alignment | Activity | Resolution | Verifiability |
|-----------|--------------------------------------------------------------------------------------------------------------------------------------|-----------------------------------------------------------------------------------------------------------------------------------------------------------------------------------------------------------------------------------------------------------------------------------------------------------------------------------------------------------------------------------------------------------------------------------------------------------------------------------------------------------------------------------------------------------------------------------------------------------------------------------------------------------------------------------------------------------------------------------------------------------------------------------------------------------------------------------------------------------------------------------------------------------------------------------------------------------------------------------------------------------------------------------------------------------------------------------------------------------------------------------------------------------------------------------------------------------------------------------------------------------------------------------------------------------------------------------------------------------------------------------------------------------------------------------------------------------------------------------------------------------------------------------------------------------------------------------------------------------------------------------------------------------------------------------------------------------------------------------------------------------------------------------------------------------------------------------------------------------------------------------------------------------------------------------------------------------------------------------------------------------------------------------------------|-----------|-------------|-------------|-----------|----------|------------|---------------|
|           |                                                                                                                                      | are not limited to: US Fair Packaging and Labeling Act, US Federal Food and Drugs Act of 1906, US Federal Food, Drug, and Cosmetic Act, US FCT Act,.<br><br>The entity may disclose other incidents of non-compliance or violations with voluntary, third party, industry or internal codes related to labeling and/or marketing, including but not limited to: Advertising Self-Regulatory Council (ARSC), Children's Advertising Review Unit (CARU) of the ASRC.                                                                                                                                                                                                                                                                                                                                                                                                                                                                                                                                                                                                                                                                                                                                                                                                                                                                                                                                                                                                                                                                                                                                                                                                                                                                                                                                                                                                                                                                                                                                                                            |           |             |             |           |          |            |               |
| 307       | Total amount of monetary losses as a result of legal proceedings associated with marketing and/or labeling practices                 | Entity shall disclose the total amount of monetary losses it incurred during the reporting period as a result of legal proceeding associated with marketing and/or labeling practices, such as those related to enforcement of US laws and regulations on nutrient content claims, health claims, other unfair or deceptive claims, and/or misbranded labeling. The legal proceedings shall include any adjudicative proceeding in which the entity was involved, whether before a court, a regulator, arbitor, or otherwise.<br><br>The losses shall include all monetary liabilities to the opposing party and others (whether as a result of settlement or verdict after trial or otherwise), including fines and other monetary liabilities incurred during reporting period as a result of civil actions (e.g. civil judgements or settlements), regulatory proceedings (e.g. penalties, disgorgement, or restitution), and criminal actions (e.g. criminal judgement, penalties, or restitution) brought by any entity (government, business, individual, etc.). The scope of monetary losses shall exclude legal and other fees and expenses incurred by entity in its defense.<br><br>The scope of disclosure shall include, but is not limited to, legal proceedings associated with enforcement of relevant industry regulations, such as: US Federal Food and Drugs Act of 1906, US Nutrition Labeling and Education Act of 1990<br><br>The entity shall briefly describe the nature (e.g., judgement or order issued after trial, settlement, guilty plea, deferred prosecution agreement, or non-prosecution agreement) and context (e.g., nutrient content claims, health claims, and misbranded labeling) of all monetary losses as a result of legal proceedings. The entity shall describe any corrective actions it has implemented as a result of legal proceedings. This may include, but is not limited to, specific changes in operations, management, processes, products, business partners, training, or technology. | SASB      | 1           | 3           | 3         | 3        | 3          | 2             |
| 308       | Number of advertising impressions made on children, percentage promoting products that meet national dietary guidelines for children | An advertising impression is a measure of the number of times an advertisement is seen, heard, watched or read. Advertising impressions include, but are not limited to: those made through media such as television, radio, print, the Internet (company-owned or third-party websites), mobile apps, interactive games (including advergames), video games, computer games, DVDs and other video formats, word-of-mouth, and licensed characters, celebrity and movie tie-ins.<br>Children defined as age 12 and under.<br><br>The number of advertising impressions made on children is calculated as the expected share of children in the audience (viewers, listeners, readers, or visitors) at the time of the media multiplied by the expected total number of advertising impressions made, regardless of whether the advertising is primarily directed to children. For example, the 35% threshold use in the CFBAI Program and Core Principles Statement, 4th edition is not applicable to the above calculation of advertising impressions made on children.                                                                                                                                                                                                                                                                                                                                                                                                                                                                                                                                                                                                                                                                                                                                                                                                                                                                                                                                                                      | SASB      | 2           | 2           | 3         | 3        | 3          | 1             |

| metric ID | Metric                                                                                                                                                                                                                                                                                                | Details for Metric use   Scoring Criteria                                                                                                                                                                                                                                                                                                                                                                                                                                                                                                                                                                                                                                                                                                                                                                                                                                                                                                                                                                                                                                                                                                                                                                                                                                                                                                                                                                                                                                                                                                                                                                                                                       | Framework | Materiality | Objectivity | Alignment | Activity | Resolution | Verifiability |
|-----------|-------------------------------------------------------------------------------------------------------------------------------------------------------------------------------------------------------------------------------------------------------------------------------------------------------|-----------------------------------------------------------------------------------------------------------------------------------------------------------------------------------------------------------------------------------------------------------------------------------------------------------------------------------------------------------------------------------------------------------------------------------------------------------------------------------------------------------------------------------------------------------------------------------------------------------------------------------------------------------------------------------------------------------------------------------------------------------------------------------------------------------------------------------------------------------------------------------------------------------------------------------------------------------------------------------------------------------------------------------------------------------------------------------------------------------------------------------------------------------------------------------------------------------------------------------------------------------------------------------------------------------------------------------------------------------------------------------------------------------------------------------------------------------------------------------------------------------------------------------------------------------------------------------------------------------------------------------------------------------------|-----------|-------------|-------------|-----------|----------|------------|---------------|
|           |                                                                                                                                                                                                                                                                                                       | <p>The entity shall disclose the percentage of advertising impressions made on children that promote products which meet national dietary guidelines for children. National dietary guidelines are defined as international, national, regional, or industry guidelines or criteria developed to promote healthy diets among children. National dietary guidelines for children include: China National Dietary Guideline for School Children, EU Food and Nutrition Policy for Schools, USDA Nutritional Standards in the National School Lunch and School Breakfast Programs, and other guidelines provided by national governmental agencies or regulators that contain daily nutritional values for children and are substantially equivalent to the guidelines referenced above.</p> <p>The percentage is calculated as the number of advertising impressions made on children that promote products that national dietary guidelines for children divided by the total number of advertising impressions made on children.</p> <p>The entity shall disclose its methodology for collecting data and estimating the number of advertising impressions made on children, where reasonable estimation methods include, but are not limited to: gross rating points and target ratios to determine impressions from TV, radio, print advertising; average visits per month, average page visits per month, and targeted index by age for company-owned websites; total number of advertising impressions viewed and child audience share on third-party websites, mobile apps, interactive games (including advergames), video games, and computer games.</p> |           |             |             |           |          |            |               |
| 309       | The company complies with laws, codes and regulations related to food labelling to provide nutrition information on key relevant nutrients and portion- or serving-based information.                                                                                                                 | Food label refers to any tag, brand, mark, pictorial or other descriptive matter that is written, printed, stencilled, marked, imbossed or impressed on, or attached to, a container of food or food product. It usually includes information on the ingredients, quality and nutritional value of the product. (FAO 2021)                                                                                                                                                                                                                                                                                                                                                                                                                                                                                                                                                                                                                                                                                                                                                                                                                                                                                                                                                                                                                                                                                                                                                                                                                                                                                                                                      | WBA       | 2           | 2           | 2         | 3        | 1          | 2             |
| 310       | The company discloses the percentage of products/menus and markets for which it has provided nutrition information on key relevant nutrients and portion- or serving-based information.                                                                                                               |                                                                                                                                                                                                                                                                                                                                                                                                                                                                                                                                                                                                                                                                                                                                                                                                                                                                                                                                                                                                                                                                                                                                                                                                                                                                                                                                                                                                                                                                                                                                                                                                                                                                 | WBA       | 2           | 1           | 1         | 2        | 1          | 3             |
| 311       | The company provides evidence of adoption of front-of-pack labels or any other consumer-facing nutrition labels that support consumers with making healthier food choices; where applicable, the company provides evidence of adoption of an interpretive government-endorsed front-of-pack labelling | <p>Front-of-pack label: are presented on the front of food packages (in the principal field of vision) and can be applied across the packaged retail food supply. There are two main categories of front-of-pack labels: interpretive and non-interpretive (informative). Interpretive systems provide at-a-glance guidance on the relative healthiness of a product; non-interpretive systems provide a summary of nutrient information from nutrient declarations for one or more nutrients and no advice or direction on the overall nutritional value of the food (WHO 2019).</p> <p>Interpretive government-endorsed front-of-pack labelling refers to front-of-pack labelling systems that are legally allowed and supported by government or other authorities in the country. Examples are Health Star Rating Systems, Nutri-score, Healthy choices logo, etc.</p>                                                                                                                                                                                                                                                                                                                                                                                                                                                                                                                                                                                                                                                                                                                                                                                      | WBA       | 3           | 2           | 2         | 3        | 1          | 2             |
| 312       | The company discloses the percentage of products/menus for which its front-of-pack labelling schemes have been rolled out; where applicable, the company discloses the percentage of products of menus for which                                                                                      | Front-of-pack label: are presented on the front of food packages (in the principal field of vision) and can be applied across the packaged retail food supply. There are two main categories of front-of-pack labels: interpretive and non-interpretive (informative). Interpretive systems provide at-a-glance guidance on the relative healthiness of a product; non-interpretive systems provide a summary of nutrient information from nutrient declarations for one or more nutrients and no advice or direction on the overall nutritional value of the food (WHO 2019).                                                                                                                                                                                                                                                                                                                                                                                                                                                                                                                                                                                                                                                                                                                                                                                                                                                                                                                                                                                                                                                                                  | WBA       | 3           | 2           | 2         | 2        | 1          | 3             |

| metric ID                                    | Metric                                                                                                                                                                                                                                                                      | Details for Metric use   Scoring Criteria                                                                                                                                                                                                                                                                                                                            | Framework | Materiality | Objectivity | Alignment | Activity | Resolution | Verifiability |
|----------------------------------------------|-----------------------------------------------------------------------------------------------------------------------------------------------------------------------------------------------------------------------------------------------------------------------------|----------------------------------------------------------------------------------------------------------------------------------------------------------------------------------------------------------------------------------------------------------------------------------------------------------------------------------------------------------------------|-----------|-------------|-------------|-----------|----------|------------|---------------|
|                                              | interpretive government-endorsed front-of-pack labels have been rolled out                                                                                                                                                                                                  | Interpretive government-endorsed front-of-pack labelling refers to front-of-pack labelling systems that are legally allowed and supported by government or other authorities in the country. Examples are Health Star Rating Systems, Nutri-score, Healthy choices logo, etc.                                                                                        |           |             |             |           |          |            |               |
| 313                                          | The company provides evidence that all of its labelling commitments have been rolled out to at least 80% of all markets or 98% of all products/menus globally.                                                                                                              |                                                                                                                                                                                                                                                                                                                                                                      | WBA       | 2           | 2           | 1         | 3        | 3          | 2             |
| 314                                          | The company has a commitment/policy for responsible advertising and marketing communication aligned with international codes and guidelines or national regulations                                                                                                         | International Chamber of Commerce's Advertising and Marketing Communications Code                                                                                                                                                                                                                                                                                    | WBA       | 2           | 2           | 2         | 1        | 1          | 3             |
| 315                                          | The company provides evidence of marketing activities to promote healthier and more nutritious food options (in accordance with a government-endorsed/widely recognised nutrient profiling system/nutritional guidelines)                                                   |                                                                                                                                                                                                                                                                                                                                                                      | WBA       | 3           | 2           | 2         | 3        | 1          | 2             |
| 316                                          | The company discloses the proportion of marketing budget spent on promoting healthier and more nutritious food options                                                                                                                                                      |                                                                                                                                                                                                                                                                                                                                                                      | WBA       | 3           | 2           | 1         | 2        | 1          | 3             |
| 317                                          | If the company produces or sells foods and/or beverages suitable for children in their portfolio, it has a responsible marketing policy specifically tailored to children that is aligned with international codes and guidelines and applicable across all media channels. | E.g.: Framework for Responsible Food and Beverage Marketing Communications 2019; IFBA Global Responsible Marketing Policy 2021                                                                                                                                                                                                                                       | WBA       | 2           | 2           | 2         | 1        | 1          | 3             |
| 318                                          | The company's responsible marketing policy includes marketing restrictions to children and teens (below the age of 18).                                                                                                                                                     | Teens are individuals aged 13-17 years (ICC Advertising and Marketing Communication Code; Convention on the Rights of the Child)                                                                                                                                                                                                                                     | WBA       | 1           | 3           | 2         | 1        | 1          | 3             |
| 319                                          | The company's marketing policy restricts marketing to children only to products meeting WHO regional standards.                                                                                                                                                             | E.g. WHO Regional Office for Europe Nutrient Profile Model; WHO Nutrient Profile Model for the Western Pacific Region.                                                                                                                                                                                                                                               | WBA       | 3           | 2           | 3         | 1        | 1          | 3             |
| 320                                          | The company provides evidence of compliance with its responsible marketing policy for children through third-party auditing                                                                                                                                                 |                                                                                                                                                                                                                                                                                                                                                                      | WBA       | 2           | 2           | 1         | 3        | 1          | 2             |
| <b>Business Nutrition-Related Governance</b> |                                                                                                                                                                                                                                                                             |                                                                                                                                                                                                                                                                                                                                                                      |           |             |             |           |          |            |               |
| 321                                          | Does the company publicly commit to placing a strategic focus on nutrition and health articulated in its mission statement and strategic commitments?                                                                                                                       | Mission statement mentions health and nutrition AND company states a strategic commitment to grow through a focus on nutrition and health<br>Either the mission statement mentions nutrition and health, or a strategic commitment to grow through a focus on health and nutrition<br>No clear focus on health and nutrition in mission statement or growth strategy | ATNI      | 3           | 2           | 1         | 1        | 1          | 3             |

| metric ID | Metric                                                                                                                                | Details for Metric use   Scoring Criteria                                                                                                                                                                                                                                                                                                                                                                                                                                                                                                                                                                                                                                                                                                                                                                                                                                                                                                                                                                                                                                                                                                                                                                                                                                                                                                                                                                                                                                                                                                                                                                                                                                                                                                                                                                                                                                                                                                                                                                                                                                                                                                                                                                                                                                                                                                                                                                                                                                                                                                                                                                                                                                                                                                                                                                                                                                                                                                                                                                            | Framework | Materiality | Objectivity | Alignment | Activity | Resolution | Verifiability |
|-----------|---------------------------------------------------------------------------------------------------------------------------------------|----------------------------------------------------------------------------------------------------------------------------------------------------------------------------------------------------------------------------------------------------------------------------------------------------------------------------------------------------------------------------------------------------------------------------------------------------------------------------------------------------------------------------------------------------------------------------------------------------------------------------------------------------------------------------------------------------------------------------------------------------------------------------------------------------------------------------------------------------------------------------------------------------------------------------------------------------------------------------------------------------------------------------------------------------------------------------------------------------------------------------------------------------------------------------------------------------------------------------------------------------------------------------------------------------------------------------------------------------------------------------------------------------------------------------------------------------------------------------------------------------------------------------------------------------------------------------------------------------------------------------------------------------------------------------------------------------------------------------------------------------------------------------------------------------------------------------------------------------------------------------------------------------------------------------------------------------------------------------------------------------------------------------------------------------------------------------------------------------------------------------------------------------------------------------------------------------------------------------------------------------------------------------------------------------------------------------------------------------------------------------------------------------------------------------------------------------------------------------------------------------------------------------------------------------------------------------------------------------------------------------------------------------------------------------------------------------------------------------------------------------------------------------------------------------------------------------------------------------------------------------------------------------------------------------------------------------------------------------------------------------------------------|-----------|-------------|-------------|-----------|----------|------------|---------------|
|           |                                                                                                                                       | The mission statement or an equivalent, such as a purpose statement, must be public in order to be credited in this indicator. A strategic focus on nutrition and health needs to be publicly disclosed and must be related to the core (commercial) business strategy of the company in order to be credited. It is not mandatory that both words 'nutrition' and 'health' are mentioned explicitly, but it should be unambiguous that both elements are covered.                                                                                                                                                                                                                                                                                                                                                                                                                                                                                                                                                                                                                                                                                                                                                                                                                                                                                                                                                                                                                                                                                                                                                                                                                                                                                                                                                                                                                                                                                                                                                                                                                                                                                                                                                                                                                                                                                                                                                                                                                                                                                                                                                                                                                                                                                                                                                                                                                                                                                                                                                   |           |             |             |           |          |            |               |
| 322       | Does the company commit to delivering more healthy foods (according to the company's definition)?                                     | Yes<br>No<br>No information                                                                                                                                                                                                                                                                                                                                                                                                                                                                                                                                                                                                                                                                                                                                                                                                                                                                                                                                                                                                                                                                                                                                                                                                                                                                                                                                                                                                                                                                                                                                                                                                                                                                                                                                                                                                                                                                                                                                                                                                                                                                                                                                                                                                                                                                                                                                                                                                                                                                                                                                                                                                                                                                                                                                                                                                                                                                                                                                                                                          | ATNI      | 2           | 2           | 1         | 1        | 1          | 3             |
| 323       | Does the company make a commitment to addressing the specific needs of priority populations through healthy and appropriate products? | <p>Yes<br/>No<br/>No information</p> <p>Companies should address the nutrition policy priorities determined by public authorities in the markets in which they are active, as relevant to companies' portfolios and activities. In addition to improving the healthiness of products for the general population, ATNI assesses whether companies commit to addressing the needs of those groups experiencing, or at higher risk of malnutrition than the general population. All aspects of malnutrition are considered relevant if identified as priority by public health authorities, and may encompass undernutrition, micronutrient deficiencies and overweight, obesity and diet-related diseases. Further, (risk of) malnutrition may be related to, or overlap with, aspects of food insecurity, defined as the uncertainties people face about their ability to obtain food and have been forced to reduce, at times during the year, the quality and/or quantity of food they consume due to lack of money or other resources.</p> <p>To refer to these groups, ATNI uses the overarching term "priority populations". Throughout ATNI's methodology, the use of this term focuses on addressing nutrition priorities in a given environment. Several factors or determinants are potentially important in identifying and addressing priority populations in relation to nutrition priorities, which are addressed in the ATNI methodology:</p> <ul style="list-style-type: none"> <li>- Nutritional factors related to age or life stages (e.g. women of childbearing age, infants, young children, elderly) and undernourished groups, with a specific focus on (the risk of) micronutrient deficiencies that can be addressed by appropriate fortification or using micronutrient-rich products, ingredients or commodities (addressed in Category B). Whether the marketing of such products is adapted appropriately to the context of the target groups is assessed in Category D, in addition to a general focus on responsible marketing of products to children and youth (i.e. refraining from marketing products that do not meet relevant health guidelines to these groups);</li> <li>- Income and other socioeconomic and cultural factors are addressed in Category C in relation to the affordability and accessibility of healthy products. In addition, behavioral factors are relevant in Category E to assess if consumer-oriented educational and lifestyle programs are well attuned to the target audiences, e.g. in relation to nutrition literacy;</li> <li>- Physical access factors e.g. in relation to rural or urban areas in which people's regular access to healthy foods may be limited: geographical factors are addressed in Category C - Criterion C2.</li> </ul> <p>These factors, which vary by market and context, should be evident in the design and nature of companies' approaches to addressing all forms of malnutrition. ATNI will assess how companies</p> | ATNI      | 2           | 1           | 1         | 1        | 1          | 3             |

| metric ID | Metric                                                                                                                                                                                                                | Details for Metric use   Scoring Criteria                                                                                                                                                                                                                                                                                                                                                                                                                                                                                                                                                                                                                                                                                                                                                                                                | Framework | Materiality | Objectivity | Alignment | Activity | Resolution | Verifiability |
|-----------|-----------------------------------------------------------------------------------------------------------------------------------------------------------------------------------------------------------------------|------------------------------------------------------------------------------------------------------------------------------------------------------------------------------------------------------------------------------------------------------------------------------------------------------------------------------------------------------------------------------------------------------------------------------------------------------------------------------------------------------------------------------------------------------------------------------------------------------------------------------------------------------------------------------------------------------------------------------------------------------------------------------------------------------------------------------------------|-----------|-------------|-------------|-----------|----------|------------|---------------|
|           |                                                                                                                                                                                                                       | identify the needs of priority populations in the markets in which they operate based on national and/or international guidelines and policies. Further, ATNI aims to credit companies' strategies that are universal but are resourced and delivered to respond to the specific nutritional needs of relevant population groups in a given market and context.                                                                                                                                                                                                                                                                                                                                                                                                                                                                          |           |             |             |           |          |            |               |
| 324       | Has the company formally set out how it intends to address all forms of malnutrition (i.e. undernutrition, micronutrient deficiencies and obesity and diet-related chronic diseases) through its commercial strategy? | <p>Yes, comprehensively<br/>           Yes, covering one or limited aspects of malnutrition only<br/>           No<br/>           No information</p> <p>The comprehensiveness of companies' commercial and philanthropic strategies will be assessed on a company level, dependent on the needs of the markets in which they operate – i.e. undernutrition may not be relevant for companies only active in developed markets.</p>                                                                                                                                                                                                                                                                                                                                                                                                       | ATNI      | 3           | 2           | 1         | 2        | 1          | 2             |
| 325       | [Supplemental score] And through its philanthropic / non-commercial approach?                                                                                                                                         | <p>Yes, comprehensively<br/>           Yes, covering one or limited aspects of malnutrition only<br/>           No<br/>           No information</p> <p>The comprehensiveness of companies' commercial and philanthropic strategies will be assessed on a company level, dependent on the needs of the markets in which they operate – i.e. undernutrition may not be relevant for companies only active in developed markets.</p> <p>The 'supplemental score' in relation to its philanthropic / non-commercial approach in indicator 3.2 is not necessary to obtain the maximum score for indicator 3. The highest answer option in indicator 3.1 is sufficient for that. However, when the score for indicator 3.1 is not maximal, indicator 3.2 can add a limited contribution (up to 30%) to the score of indicator 3 in total.</p> | ATNI      | 2           | 2           | 1         | 2        | 1          | 2             |
| 326       | Does the company publicly recognize the targets set out in the WHO Global Action Plan for the Prevention and Control of NCDs 2013-2020?                                                                               | <p>Yes<br/>           No<br/>           No information</p> <p>The main focus of WHO Global Action Plan for the Prevention and Control of NCDs 2013-2020 is on four types of NCDs — cardiovascular diseases, cancer, chronic respiratory diseases and diabetes — that make the largest contribution to morbidity and mortality due to NCDs, and on four shared behavioral risk factors — tobacco use, unhealthy diet, physical inactivity and harmful use of alcohol. It recognizes that the conditions in which people live and work, and their lifestyles, influence their health and quality of life. ATNI works in line with the Global Action Plan, focusing mainly on nutrition-related NCDs, and on behavioral risk factors related to nutrition and physical activity.</p>                                                        | ATNI      | 2           | 3           | 2         | 1        | 1          | 3             |
| 327       | Does the company publicly commit to delivering nutrition-specific SDGs (Goal 2, Goal 3 and Goal 12)?                                                                                                                  | <p>Yes, covering all three SDGs mentioned<br/>           Yes, covering one or two of the SDGs mentioned, or by acknowledging the central role of nutrition to achieve the SDG agenda and committing to address it<br/>           No</p> <p>The 2030 Agenda for Sustainable Development, adopted by all United Nations Member States in 2015, provides a shared blueprint for peace and prosperity for people and the planet, now and into the future. At its heart are the 17 Sustainable Development Goals (SDGs), which are an urgent call for action by all countries - developed and developing - in a global partnership. They recognize that ending poverty and other forms of deprivation must go together with strategies</p>                                                                                                    | ATNI      | 3           | 3           | 3         | 1        | 1          | 3             |

| metric ID | Metric                                                                                                                                                                                          | Details for Metric use   Scoring Criteria                                                                                                                                                                                                                                                                                                                                                                                                                                                                                                                                                                                                                                                                                                                                                                                                                                                                                                                                                                                                                                                                                                                                                                                                                                   | Framework | Materiality | Objectivity | Alignment | Activity | Resolution | Verifiability |
|-----------|-------------------------------------------------------------------------------------------------------------------------------------------------------------------------------------------------|-----------------------------------------------------------------------------------------------------------------------------------------------------------------------------------------------------------------------------------------------------------------------------------------------------------------------------------------------------------------------------------------------------------------------------------------------------------------------------------------------------------------------------------------------------------------------------------------------------------------------------------------------------------------------------------------------------------------------------------------------------------------------------------------------------------------------------------------------------------------------------------------------------------------------------------------------------------------------------------------------------------------------------------------------------------------------------------------------------------------------------------------------------------------------------------------------------------------------------------------------------------------------------|-----------|-------------|-------------|-----------|----------|------------|---------------|
|           |                                                                                                                                                                                                 | <p>that improve health and education, reduce inequality, and spur economic growth – all while tackling climate change and working to preserve our oceans and forests.</p> <p>ATNI considers that food and beverage companies have a key role to play in achieving the SDGs, and a more sustainable future for all. Particularly, with regards to:</p> <ul style="list-style-type: none"> <li>- SGD 2, to end hunger, achieve food security and improved nutrition and promote sustainable agriculture;</li> <li>- SDG 3, focused on Ensuring healthy lives and promote well-being for all at all ages;</li> <li>- SDG 12 which aims at ensuring sustainable consumption and production patterns (particularly considering target 12.3, focused on halving the per capita global food waste at the retail and consumer levels and reduce food losses along production and supply chains, including post-harvest losses by 2030).</li> </ul> <p>Although the ambition to reach zero hunger and healthy sustainable diets for all is most directly linked to SDG's 2, 3 and 12, at least 12 of the 17 Goals contain indicators that are related to nutrition. Without adequate and sustained investments in good nutrition, the complete set of SDGs will not be realized.</p> |           |             |             |           |          |            |               |
| 328       | Does the company conduct a nutrition-related business risk assessment at least every 2 years?                                                                                                   | <p>Extensive<br/>Limited<br/>No<br/>No information</p> <p>Extensive risk assessment encompasses most elements of litigation risk, trend analysis, regulatory risk, market risk, specific category or brand risk and reputational risk. For example, these risks can be mentioned:</p> <ul style="list-style-type: none"> <li>- Future nutrition-related taxes</li> <li>- Impact of future potential nutrition-related litigation</li> <li>- Impact of future potential regulation of marketing</li> <li>- Impact of future potential regulation of labelling and health and nutrition claims</li> <li>- Likelihood of loss of market share due to consumer concerns related to nutrition</li> <li>- Likelihood of significant loss of revenues due to consumers' changing buying habits</li> <li>- Impact on reputation of poor performance on nutrition</li> <li>- Impact on brand value of poor performance on nutrition</li> </ul>                                                                                                                                                                                                                                                                                                                                       | ATNI      | 3           | 2           | 1         | 2        | 1          | 2             |
| 329       | Has the company publicly stated that nutrition was a factor in the company's decisions about acquisitions, disposals and forming joint ventures (JV) or other partnerships in the last 3 years? | <p>Company states that nutrition issues are factored into its acquisitions, disposals, JV or partnership decisions and provides specific examples<br/>Company states that nutrition issues are factored into its acquisitions, disposals, JV or partnership decisions but does not provide specific examples<br/>No evidence that nutrition issues are factored into a company's acquisitions, disposals, JV or partnership decisions<br/>Not applicable (no such decision in the last 3 years)</p> <p>'State' refers to an explicit mention in the annual report, a press release or other document regarding the disposal or acquisition of a business or unit in response to relevant health or nutrition trends. The document needs to be publicly disclosed by the company itself. If no acquisitions, disposals and or joint ventures or other partnerships occurred in the last 3 years, this indicator is not applicable and is removed from scoring.</p>                                                                                                                                                                                                                                                                                                           | ATNI      | 2           | 1           | 1         | 2        | 1          | 3             |

| metric ID | Metric                                                                                                                                                                                                                                                                                                                                          | Details for Metric use   Scoring Criteria                                                                                                                                                                                                                                                                                                                                                                                                                                                                                                                                                                                                                                                                                                                                                                                                                                               | Framework | Materiality | Objectivity | Alignment | Activity | Resolution | Verifiability |
|-----------|-------------------------------------------------------------------------------------------------------------------------------------------------------------------------------------------------------------------------------------------------------------------------------------------------------------------------------------------------|-----------------------------------------------------------------------------------------------------------------------------------------------------------------------------------------------------------------------------------------------------------------------------------------------------------------------------------------------------------------------------------------------------------------------------------------------------------------------------------------------------------------------------------------------------------------------------------------------------------------------------------------------------------------------------------------------------------------------------------------------------------------------------------------------------------------------------------------------------------------------------------------|-----------|-------------|-------------|-----------|----------|------------|---------------|
| 330       | What actions has the company taken to identify priority populations that are relevant in relation to the company context?                                                                                                                                                                                                                       | <p>Priority populations have been identified based on priorities defined by relevant health and/or social care authorities</p> <p>No priority populations have been identified based on priorities defined by relevant health and/or social care authorities</p> <p>No information</p> <p>Please provide concrete examples of priority populations that have been identified by the company in the comment sections on the ATNI data gathering platform.</p> <p>Please refer to the additional information related to A1 indicator 2 for an extensive description of the purpose of addressing priority populations' specific needs. It is imperative for a company to identify the relevant priority populations to know which groups are at (high) risk of or suffering from any form of malnutrition, in order to define specific strategies to address their nutritional needs.</p> | ATNI      | 1           | 2           | 1         | 2        | 2          | 2             |
| 331       | Has the company undertaken a strategic review in the last 3 years of the commercial opportunities available to it in addressing specific needs of priority populations and at what level of the company was this reviewed?                                                                                                                      | <p>Yes, comprehensively and reviewed by the Board</p> <p>Yes, but limited and reviewed by the Board</p> <p>Yes, comprehensively but not reviewed at Board level</p> <p>Yes, but limited and not reviewed at Board level</p> <p>No strategic review</p> <p>No information</p> <p>For this indicator, a strategic review means a broad review that takes into account company-internal (e.g. portfolio, distribution, innovation strategy) and other considerations, which may include market research such as assessed in indicator 9. Malnutrition includes undernutrition, micronutrient deficiencies, obesity and diet-related diseases. A comprehensive review covers all of these types of malnutrition.</p>                                                                                                                                                                        | ATNI      | 2           | 3           | 1         | 2        | 1          | 2             |
| 332       | Has the company done market research or other types of studies to assess unmet needs of priority populations, including through products that address micronutrient deficiencies (which may be through micronutrient fortification, the use of fortified ingredients/staples and/or products inherently high in micronutrients) where relevant? | <p>Yes</p> <p>No such market studies done</p> <p>No information</p> <p>In order to be credited, the objective of the market research or other types of studies should be to assess or identify unmet needs in the market that can be addressed commercially. Initiatives that are not part of the commercial strategy or philanthropic programs are not relevant for this indicator.</p>                                                                                                                                                                                                                                                                                                                                                                                                                                                                                                | ATNI      | 1           | 2           | 1         | 2        | 1          | 2             |
| 333       | Is the company's commercial nutrition strategy and general approach to making its products healthier and addressing issues related to obesity and diet-related chronic disease [strategic and well structured]?                                                                                                                                 | <p>Strategic and well-structured with a global strategy that is aligned with international guidelines</p> <p>Ad hoc</p> <p>Not articulated</p> <p>In the answer options, "strategic" means that the company seems to have a clear rationale and approach for focusing on the target populations that the questions refer to; "well-structured" means that it appears to follow a sensible process, following specific steps in all markets. The activities in question need to be part of the commercial strategy rather than being delivered through philanthropic programs or giving.</p>                                                                                                                                                                                                                                                                                             | ATNI      | 2           | 2           | 1         | 2        | 1          | 2             |
| 334       | Is the company's commercial approach to address nutrition-related unmet needs of priority populations across the markets in                                                                                                                                                                                                                     | <p>Strategic and well-structured with a global strategy that is aligned with international guidelines</p> <p>Ad hoc</p> <p>Not articulated</p>                                                                                                                                                                                                                                                                                                                                                                                                                                                                                                                                                                                                                                                                                                                                          | ATNI      | 2           | 2           | 1         | 2        | 1          | 2             |

| metric ID | Metric                                                                                                                                                                                                                                     | Details for Metric use   Scoring Criteria                                                                                                                                                                                                                                                                                                                                                                                                                                                                                                                   | Framework | Materiality | Objectivity | Alignment | Activity | Resolution | Verifiability |
|-----------|--------------------------------------------------------------------------------------------------------------------------------------------------------------------------------------------------------------------------------------------|-------------------------------------------------------------------------------------------------------------------------------------------------------------------------------------------------------------------------------------------------------------------------------------------------------------------------------------------------------------------------------------------------------------------------------------------------------------------------------------------------------------------------------------------------------------|-----------|-------------|-------------|-----------|----------|------------|---------------|
|           | which it is active [strategic and well-structured]?                                                                                                                                                                                        | In the answer options, "strategic" means that the company seems to have a clear rationale and approach for focusing on the target populations that the questions refer to; "well-structured" means that it appears to follow a sensible process, following specific steps in all markets. The activities in question need to be part of the commercial strategy rather than being delivered through philanthropic programs or giving."                                                                                                                      |           |             |             |           |          |            |               |
| 335       | [Supplemental score] Does the company or its foundation fund non-commercial public health and nutrition programs that serve priority populations?                                                                                          | Yes, based on a clear strategy or plan<br>Yes, on an ad-hoc basis<br>No<br>No information                                                                                                                                                                                                                                                                                                                                                                                                                                                                   | ATNI      | 1           | 2           | 1         | 2        | 1          | 2             |
| 336       | Who has formal accountability for implementing the company's nutrition strategy and/or program?                                                                                                                                            | CEO or other senior Executive<br>Committee that reports to the Board or an Executive Manager<br>Senior manager one level below Executive<br>Another less senior staff member<br>No oversight assigned<br>No information<br><br>Note that the accountable person is the individual who is ultimately answerable for the activity or decision. This includes "yes" or "no" authority and veto power. Only one accountable person can be assigned to an action.                                                                                                | ATNI      | 3           | 3           | 1         | 2        | 1          | 2             |
| 337       | Is this accountability concretely linked to individuals' remuneration arrangements in relation to targets or objectives?                                                                                                                   | CEO's remuneration is specifically linked to performance on nutrition objectives<br>CEO's remuneration is linked to performance on CSR initiatives (nutrition clearly being part of those initiatives)<br>Only links senior managers' remuneration to performance on nutrition objectives<br>No link<br>No information<br><br>Note that the accountable person is the individual who is ultimately answerable for the activity or decision. This includes "yes" or "no" authority and veto power. Only one accountable person can be assigned to an action. | ATNI      | 3           | 2           | 1         | 2        | 1          | 2             |
| 338       | Does the accountability arrangement for implementing the company's nutrition strategy and/or program explicitly cover: The company's commercial strategy/program to address undernutrition and/or micronutrient deficiencies?              | Yes, at the same managerial level as the company's overall nutrition strategy/program<br>Yes, at a lower managerial level than the company's overall nutrition strategy<br>Not covered explicitly<br>No information<br>Not applicable<br><br>Formal statement required.                                                                                                                                                                                                                                                                                     | ATNI      | 2           | 3           | 1         | 2        | 1          | 2             |
| 339       | Does the accountability arrangement for implementing the company's nutrition strategy and/or program explicitly cover: The company's commercial strategy/program for improving the affordability and availability of its healthy products? | Yes, covering both aspects at the same managerial level as the company's overall nutrition strategy/program<br>Yes, covering both aspects at a lower managerial level than the company's overall nutrition strategy or covering only one aspect at the same managerial level<br>Yes, covering only one aspect at a lower managerial level than the company's overall nutrition strategy<br>Both aspects are not covered explicitly<br>No information<br><br>Formal statement required.                                                                      | ATNI      | 3           | 3           | 1         | 2        | 1          | 2             |



| metric ID | Metric                                                                                                                                                                                              | Details for Metric use   Scoring Criteria                                                                                                                                                                                                                                                                                                                                                                                                                                                                                                                                                                                                                                                                                                                                                                                                                                                                                                                                                                                            | Framework | Materiality | Objectivity | Alignment | Activity | Resolution | Verifiability |
|-----------|-----------------------------------------------------------------------------------------------------------------------------------------------------------------------------------------------------|--------------------------------------------------------------------------------------------------------------------------------------------------------------------------------------------------------------------------------------------------------------------------------------------------------------------------------------------------------------------------------------------------------------------------------------------------------------------------------------------------------------------------------------------------------------------------------------------------------------------------------------------------------------------------------------------------------------------------------------------------------------------------------------------------------------------------------------------------------------------------------------------------------------------------------------------------------------------------------------------------------------------------------------|-----------|-------------|-------------|-----------|----------|------------|---------------|
| 340       | Is the company's nutrition strategy/program approved by the Board of Directors and is its delivery subject to an annual standard internal audit and annual management review? (Tick all that apply) | <p>Nutrition strategy/program is approved by the Board<br/>Annual internal audit of strategy/program delivery is in place<br/>Annual management review of strategy/program delivery is in place</p> <p>Note that internal auditing or first-party auditing is an assurance and consulting activity undertaken by the company itself designed to add value and improve an organization's operations. It helps an organization accomplish its objectives and internal standards by bringing a systematic, disciplined approach to evaluate and improve the effectiveness of risk management, control, and governance processes. Such audits are most often performed by auditors employed within the organization.<br/>Management review is the routine evaluation of whether management systems are performing as intended and producing the desired results as efficiently as possible. It is the ongoing "due diligence" review by management that fills the gap between day-to-day work activities and periodic formal audits.</p> | ATNI      | 3           | 3           | 1         | 2        | 1          | 2             |
| 341       | Does the company publish formal, regular reports on its overall approach to tackling nutrition issues and how often?                                                                                | <p>Yes, annually (i.e. the company has an annual reporting cycle)<br/>Yes, but less frequently than annually<br/>No reporting</p> <p>The report or document may be part of a CSR, sustainability or annual report; it does not have to be a separate report. In order to be considered for this indicator, the reports need to be disclosed publicly.</p>                                                                                                                                                                                                                                                                                                                                                                                                                                                                                                                                                                                                                                                                            | ATNI      | 2           | 3           | 1         | 2        | 1          | 3             |
| 342       | In what kind of publication and how does the company report on its nutrition activities?                                                                                                            | <p>Throughout the Annual Report and Accounts or equivalent, highlighting how nutrition issues are adding value to the business<br/>Within its Annual Report and Accounts or equivalent, e.g. in the sustainability or corporate responsibility section<br/>In a separate report (e.g. website) on its nutrition activities but does not mention nutrition issues its Annual Report and Accounts or equivalent.<br/>No reporting</p>                                                                                                                                                                                                                                                                                                                                                                                                                                                                                                                                                                                                  | ATNI      | 2           | 3           | 1         | 2        | 1          | 3             |
| 343       | [Characterize] the company's reporting on preventing and tackling obesity and diet-related diseases include: (Tick all that apply)                                                                  | <p>A clear sense of the company's nutrition strategy and how it relates to overall business strategy<br/>Clear reporting on current performance against all objectives and targets<br/>A clear outlook on future plans and targets<br/>Explanation of the challenges faced<br/>Information about the impact of its efforts, in terms of those reached</p>                                                                                                                                                                                                                                                                                                                                                                                                                                                                                                                                                                                                                                                                            | ATNI      | 2           | 1           | 1         | 2        | 1          | 3             |
| 344       | [Characterize] the company's reporting on preventing and tackling undernutrition and/or micronutrient deficiencies include: (Tick all that apply)                                                   | <p>A clear sense of the company's strategy and how it relates to overall business strategy<br/>Clear reporting on current performance against all objectives and targets<br/>A clear outlook on future plans and targets<br/>Explanation of the challenges faced, not only success/positive stories<br/>Information about the impact of its efforts, in terms of those reached<br/>Not applicable</p>                                                                                                                                                                                                                                                                                                                                                                                                                                                                                                                                                                                                                                | ATNI      | 2           | 1           | 1         | 2        | 1          | 3             |
| 345       | What is the geographical scope of the company's nutrition reporting?                                                                                                                                | <p>Reporting covers global operations<br/>Reporting only covers major markets<br/>No reporting</p>                                                                                                                                                                                                                                                                                                                                                                                                                                                                                                                                                                                                                                                                                                                                                                                                                                                                                                                                   | ATNI      | 2           | 3           | 1         | 2        | 1          | 3             |
| 346       | Does the company make specific reference to different markets in the published periodic reports?                                                                                                    | <p>For several major national markets<br/>For 1-2 national markets only<br/>No additional reporting</p>                                                                                                                                                                                                                                                                                                                                                                                                                                                                                                                                                                                                                                                                                                                                                                                                                                                                                                                              | ATNI      | 2           | 3           | 1         | 2        | 1          | 3             |
| 347       | Is the company's nutrition reporting subject to verification or external review?                                                                                                                    | <p>The report that contains the nutrition commentary is independently verified<br/>Report not formally verified but includes commentary from independent external reviewer(s)<br/>No or limited external review</p>                                                                                                                                                                                                                                                                                                                                                                                                                                                                                                                                                                                                                                                                                                                                                                                                                  | ATNI      | 2           | 3           | 1         | 2        | 1          | 3             |

| metric ID | Metric                                                                                                                                                                                                                                                                           | Details for Metric use   Scoring Criteria                                                                                                                                                                                                                                                                                                                                                                                                                                                                                                                                                                                                                                                                                                                                                                                                                                                                                                                                                                              | Framework | Materiality | Objectivity | Alignment | Activity | Resolution | Verifiability |
|-----------|----------------------------------------------------------------------------------------------------------------------------------------------------------------------------------------------------------------------------------------------------------------------------------|------------------------------------------------------------------------------------------------------------------------------------------------------------------------------------------------------------------------------------------------------------------------------------------------------------------------------------------------------------------------------------------------------------------------------------------------------------------------------------------------------------------------------------------------------------------------------------------------------------------------------------------------------------------------------------------------------------------------------------------------------------------------------------------------------------------------------------------------------------------------------------------------------------------------------------------------------------------------------------------------------------------------|-----------|-------------|-------------|-----------|----------|------------|---------------|
|           |                                                                                                                                                                                                                                                                                  | Documents must be publicly available.                                                                                                                                                                                                                                                                                                                                                                                                                                                                                                                                                                                                                                                                                                                                                                                                                                                                                                                                                                                  |           |             |             |           |          |            |               |
| 348       | For nutrition literacy and education, healthy diet-oriented, and active lifestyle programs, does the company [Commit to, or demonstrate, that programs exclude product or brand level branding]?                                                                                 | <p>Commit to, or demonstrate, that all programs exclude product or brand level branding</p> <p>Commit to, or demonstrate, that some of its programs exclude product or brand-level branding</p> <p>No</p> <p>No information</p> <p>Additional information: Nutrition literacy may be defined as “the degree to which individuals have the capacity to obtain, process, and understand nutrition information and skills needed in order to make appropriate nutrition decisions.” (D Gibbs, et al., 2018).</p> <p>In order for this indicator to be credited, a policy document or similar statement regarding the company’s approach to nutrition literacy and education, healthy diet-oriented, and active lifestyle programs is relevant but evidence (or a description) of all relevant programs about the branding approach, evidence base and/or alignment with national or international guidelines is accepted as well.</p>                                                                                     | ATNI      | 2           | 3           | 1         | 2        | 1          | 2             |
| 349       | For nutrition literacy and education, healthy diet-oriented, and active lifestyle programs, does the company [Commit to, or demonstrate, that programs are evidence-based and aligned with relevant national or international guidelines]?                                       | <p>Commit to, or demonstrate, that all programs are evidence-based and aligned with relevant national or international guidelines</p> <p>Commit to, or demonstrate, that some of its programs are evidence-based and aligned with relevant national or international guidelines</p> <p>No</p> <p>No information</p> <p>Additional information: Nutrition literacy may be defined as “the degree to which individuals have the capacity to obtain, process, and understand nutrition information and skills needed in order to make appropriate nutrition decisions.” (D Gibbs, et al., 2018).</p> <p>In order for this indicator to be credited, a policy document or similar statement regarding the company’s approach to nutrition literacy and education, healthy diet-oriented, and active lifestyle programs is relevant but evidence (or a description) of all relevant programs about the branding approach, evidence base and/or alignment with national or international guidelines is accepted as well.</p> | ATNI      | 2           | 2           | 1         | 2        | 1          | 2             |
| 350       | For nutrition education/nutrition literacy/healthy diet-oriented/active lifestyle programs, what types of programs does the company offer/sponsor/fund?                                                                                                                          | <p>Only those designed by and/or (co)implemented with diverse stakeholder groups with relevant expertise</p> <p>Evidence of some programs designed by or (co)implemented with stakeholder groups with relevant expertise</p> <p>Only its own programs</p> <p>No relevant information</p> <p>We credit both evidences based on implemented programs as well as a policy or strategy showing this is the case.</p>                                                                                                                                                                                                                                                                                                                                                                                                                                                                                                                                                                                                       | ATNI      | 2           | 2           | 1         | 2        | 1          | 2             |
| 351       | For nutrition education/nutrition literacy/healthy diet-oriented/active lifestyle programs that aim to reach priority populations, does the company support or fund programs that are adapted to the specific needs, background and level of nutrition literacy of these groups? | <p>Yes, and these adapted programs have been designed by and/or (co)implemented with groups with relevant expertise and strong leadership in the process</p> <p>Yes, and some of these adapted programs have been designed by and/or (co)implemented with groups with relevant expertise and strong leadership in the process</p> <p>Company only offers own programs</p> <p>No information</p> <p>Not applicable (i.e. this indicator is not relevant as no priority populations are reached)</p>                                                                                                                                                                                                                                                                                                                                                                                                                                                                                                                     | ATNI      | 2           | 2           | 1         | 2        | 1          | 2             |

| metric ID | Metric                                                                                                                                                                                                     | Details for Metric use   Scoring Criteria                                                                                                                                                                                                                                                                                                                                                                                                                                                                                                                                                                                                                                                                                                                                 | Framework | Materiality | Objectivity | Alignment | Activity | Resolution | Verifiability |
|-----------|------------------------------------------------------------------------------------------------------------------------------------------------------------------------------------------------------------|---------------------------------------------------------------------------------------------------------------------------------------------------------------------------------------------------------------------------------------------------------------------------------------------------------------------------------------------------------------------------------------------------------------------------------------------------------------------------------------------------------------------------------------------------------------------------------------------------------------------------------------------------------------------------------------------------------------------------------------------------------------------------|-----------|-------------|-------------|-----------|----------|------------|---------------|
| 352       | For nutrition education/nutrition literacy/healthy diet-oriented/active lifestyle programs, how does the company evaluate the outcomes of the programs?                                                    | All programs are evaluated by independent groups with relevant expertise (i.e. third-party evaluation)<br>Some programs are evaluated by independent groups with relevant expertise (i.e. third-party evaluation)<br>Evaluated by the company itself (i.e. first-party or internal evaluation)<br>No evaluations are performed<br>No relevant information                                                                                                                                                                                                                                                                                                                                                                                                                 | ATNI      | 2           | 2           | 1         | 2        | 1          | 2             |
| 353       | Does the company publicly commit to a lobbying policy or code of conduct [consist with public health nutrition]: (Tick all that apply)                                                                     | Only engaging with governments, political parties, policymakers and policymaking bodies in support of measures to improve health and nutrition, consistent with the public interest<br>Only engaging in lobbying activities that support an evidence-based approach to policy making, with the emphasis on independent, peer-reviewed science<br>Measures preventing bribery and corruption in its relations with public officials, including the offering and receiving of gifts, hospitality or other financial and in-kind incentives<br>Ensuring that its lobbying activities respect public policy frameworks developed by international agencies, national and/or sub-national governments, and standard-setting bodies that offer guidance on responsible lobbying | ATNI      | 3           | 2           | 1         | 1        | 1          | 3             |
| 354       | Do the commitments explicitly cover all intermediate lobbying conducted by third parties paid or unpaid by the company?                                                                                    | Yes<br>No<br>Additional information: Only commitments/ statements (not actions) will be taken into consideration.                                                                                                                                                                                                                                                                                                                                                                                                                                                                                                                                                                                                                                                         | ATNI      | 2           | 3           | 1         | 1        | 1          | 3             |
| 355       | Does the company commit to play an active and constructive part in supporting governments' efforts to combat all forms of malnutrition?                                                                    | Yes<br>No<br>No information                                                                                                                                                                                                                                                                                                                                                                                                                                                                                                                                                                                                                                                                                                                                               | ATNI      | 3           | 2           | 1         | 1        | 1          | 3             |
| 356       | Does the company provide examples of playing an active and constructive role in supporting governments' efforts to combat all forms of malnutrition?                                                       | Yes, showing examples relating to three or more countries<br>Yes, showing examples relating to one or two countries<br>No<br>No information<br>Examples can cover efforts to address undernutrition and micronutrient deficiencies, e.g. supporting the government to require fortification of staples, to reduce tariffs on imported fortified staples, to require manufacturers to use fortified staples etc., as well as efforts to address obesity and diet-related diseases.                                                                                                                                                                                                                                                                                         | ATNI      | 3           | 2           | 1         | 2        | 1          | 2             |
| 357       | Does the company have mechanisms in place to arrange the following [board oversight of lobbying efforts, internal or independent auditing of lobbying activities, and internal whistleblowing mechanisms]? | Board oversight of lobbying policy positions, processes and practices, including third parties<br>Internal or independent audits of the company's lobbying activities, including third parties<br>An internal whistleblowing mechanism that covers the company's lobbying policy and/or code of conduct                                                                                                                                                                                                                                                                                                                                                                                                                                                                   | ATNI      | 2           | 3           | 1         | 2        | 1          | 2             |
| 358       | Does the company provide evidence of engaging with the following stakeholders in developing its nutrition strategy, policies and/or programs: (Tick all that apply)                                        | International organizations (such as UN agencies) or regional institutions<br>National bodies and institutions<br>CSOs, including NGOs<br>Academic institutions or scientific experts<br>Other<br>An essential element in order for stakeholder engagement to be credited for this indicator, and throughout Criterion G2 (unless stated otherwise), is that stakeholder engagement should be focused on, or include an element of, gathering input from stakeholders to develop or improve                                                                                                                                                                                                                                                                               | ATNI      | 2           | 2           | 2         | 2        | 1          | 2             |

| metric ID | Metric                                                                                                                                                                                                                 | Details for Metric use   Scoring Criteria                                                                                                                                                                                                                                                                                                                                                                                                                                                                                                                                                                                                                                                                                                                                                                                                                                                                                                                                                                                                                                                                                                                                                                                                                                                                                                                                                                                                                                                                                                                                                                                                                                                                                                                                                                                                                                                                                                                                                                                                                                                                                                                                                                                                                                                                                                                                                                        | Framework | Materiality | Objectivity | Alignment | Activity | Resolution | Verifiability |
|-----------|------------------------------------------------------------------------------------------------------------------------------------------------------------------------------------------------------------------------|------------------------------------------------------------------------------------------------------------------------------------------------------------------------------------------------------------------------------------------------------------------------------------------------------------------------------------------------------------------------------------------------------------------------------------------------------------------------------------------------------------------------------------------------------------------------------------------------------------------------------------------------------------------------------------------------------------------------------------------------------------------------------------------------------------------------------------------------------------------------------------------------------------------------------------------------------------------------------------------------------------------------------------------------------------------------------------------------------------------------------------------------------------------------------------------------------------------------------------------------------------------------------------------------------------------------------------------------------------------------------------------------------------------------------------------------------------------------------------------------------------------------------------------------------------------------------------------------------------------------------------------------------------------------------------------------------------------------------------------------------------------------------------------------------------------------------------------------------------------------------------------------------------------------------------------------------------------------------------------------------------------------------------------------------------------------------------------------------------------------------------------------------------------------------------------------------------------------------------------------------------------------------------------------------------------------------------------------------------------------------------------------------------------|-----------|-------------|-------------|-----------|----------|------------|---------------|
|           |                                                                                                                                                                                                                        | <p>the company's nutrition strategy, policies and programs. This engagement should not be paid for. Engaging with stakeholders to explain or educate them on company programs, initiatives or approaches is not sufficient if the focus is only on providing information and not on receiving input or feedback.</p> <p>Global Reporting Initiative (GRI) G4 guidelines defines stakeholders as follows: "According to GRI, stakeholders are defined as entities or individuals that can reasonably be expected to be significantly affected by the organisation's activities, products, and services; and whose actions can reasonably be expected to affect the ability of the organisation to successfully implement its strategies and achieve its objectives" (see for more information: <a href="http://www2.globalreporting.org/standards/g4/Pages/default.aspx">www2.globalreporting.org/standards/g4/Pages/default.aspx</a>)</p> <p>ATNI defines stakeholder engagement as the process by which the company involves individuals, entities, organizations, etc. who may be affected by its decisions / actions or who can influence these decisions. That individual/ entity/ organization may support or oppose, hold influence in the company or outside of it, hold relevant official positions or may be affected in the long term via a non-paid relationship.</p> <p>Further, consumer organizations or priority population-related associations or platforms are considered as examples of civil society organizations, defined "to include all non-market and non-state organizations outside of the family in which people organize themselves to pursue shared interests in the public domain" (UNDP, 2015, "NGOs and CSOs: A note on terminology"). However, all forms of marketing, market research or marketing-related consumer insights research that involves engagement with these groups, or such engagement with (groups of) consumers, should not be considered under this indicator. Only engagement for the purpose of gathering input to develop the company's nutrition strategy, policies and/or programs; or identifying and assessing any actual or potential adverse impacts to the realization of their right to adequate food resulting from business activity should be considered (following the UN Guiding Principles on Business and Human Rights, principle 18).</p> |           |             |             |           |          |            |               |
| 359       | What form of engagement designed to improve or develop its nutrition strategy, policies or programs does the company have with stakeholders as evidenced by examples provided by the company?                          | <p>Comprehensive, well-structured and focused engagement on business strategy and performance; with both international and local stakeholders</p> <p>Comprehensive, well-structured and focused engagement on business strategy and performance; with (local) home country stakeholders</p> <p>Limited; typically, one-way communication rather than engagement, and more ad-hoc; with either international or local stakeholders</p> <p>No engagement</p> <p>No information</p> <p>Stakeholder engagement refers to the process by which the company involves individuals, entities, organizations, etc. who may be affected by its decisions / actions or can influence these. This engagement should not be paid for. For more information, please see the additional information under indicator 1, above</p>                                                                                                                                                                                                                                                                                                                                                                                                                                                                                                                                                                                                                                                                                                                                                                                                                                                                                                                                                                                                                                                                                                                                                                                                                                                                                                                                                                                                                                                                                                                                                                                                | ATNI      | 2           | 2           | 1         | 2        | 1          | 2             |
| 360       | Does the company seek specialist external experts' advice on how it should design its strategies, policies and programs to prevent and address: Obesity and diet-related chronic diseases on a strategic/ Board level? | <p>Formal panel of experts with a broad range of expertise (i.e. nutrition and health, responsible marketing, labelling, promoting active lifestyles, etc.)</p> <p>Formal panel of experts with narrow range of expertise (e.g. medical or nutrition only; no marketing/sports and activity/nutrition education etc. specialists)</p> <p>Informal/ad-hoc input sought or input from individual experts with relevant area of expertise</p> <p>No external input sought/no information</p>                                                                                                                                                                                                                                                                                                                                                                                                                                                                                                                                                                                                                                                                                                                                                                                                                                                                                                                                                                                                                                                                                                                                                                                                                                                                                                                                                                                                                                                                                                                                                                                                                                                                                                                                                                                                                                                                                                                        | ATNI      | 2           | 2           | 1         | 2        | 1          | 2             |

| metric ID | Metric                                                                                                                                                                                                                    | Details for Metric use   Scoring Criteria                                                                                                                                                                                                                                                                                                                                                                                                                                                                                                                                                                                                                                                                                                                                                                                                                                                                                                                                                                                                 | Framework | Materiality | Objectivity | Alignment | Activity | Resolution | Verifiability |
|-----------|---------------------------------------------------------------------------------------------------------------------------------------------------------------------------------------------------------------------------|-------------------------------------------------------------------------------------------------------------------------------------------------------------------------------------------------------------------------------------------------------------------------------------------------------------------------------------------------------------------------------------------------------------------------------------------------------------------------------------------------------------------------------------------------------------------------------------------------------------------------------------------------------------------------------------------------------------------------------------------------------------------------------------------------------------------------------------------------------------------------------------------------------------------------------------------------------------------------------------------------------------------------------------------|-----------|-------------|-------------|-----------|----------|------------|---------------|
|           |                                                                                                                                                                                                                           | External experts" refers to an advisory panel / expert group with broad range of expertise, including in the field of labelling, marketing etc.<br><br>This indicator considers both paid and non-paid expert engagement.                                                                                                                                                                                                                                                                                                                                                                                                                                                                                                                                                                                                                                                                                                                                                                                                                 |           |             |             |           |          |            |               |
| 361       | Does the company seek specialist external experts' advice on how it should design its strategies, policies and programs to prevent and address: Undernutrition and micronutrient deficiencies on a strategic/Board level? | Formal panel of experts with a broad range of expertise (i.e. nutrition and health, responsible marketing, labelling, promoting active lifestyles, etc.)<br>Formal panel of experts with narrow range of expertise (e.g. medical or nutrition only; no marketing/sports and activity/nutrition education etc. specialists)<br>Informal/ad-hoc input sought or input from individual experts with relevant area of expertise<br>No external input sought/no information<br><br>External experts" refers to an advisory panel / expert group with broad range of expertise, including in the field of labelling, marketing etc.<br><br>This indicator considers both paid and non-paid expert engagement.                                                                                                                                                                                                                                                                                                                                   | ATNI      | 2           | 2           | 1         | 2        | 1          | 2             |
| 362       | Has the company publicly adhered to the following international codes of conduct: (Tick all that apply)                                                                                                                   | UN Guiding Principles on Business and Human Rights<br>Code of Ethics for International Trade in Food, adopted by the Codex Alimentarius<br>2016 FAO/OECD Guidance for Responsible Agricultural Supply Chains<br>Guiding Principles on Human Rights Impact Assessments of Trade and Investment Agreements<br>Principles for Responsible Investments in Agriculture and Food Systems<br>OECD Guidelines for Multinational Enterprises / OECD Due Diligence Guidance for Responsible Business Conduct<br>ILO Tripartite Declaration of Principles concerning Multinational Enterprises and Social Policy (MNE Declaration)<br>UN Global Compact<br><br>In assessing this indicator, companies will be credited if they make an explicit reference to the international codes of conduct in their reporting, initiatives or other (internal or public) documentation. Implicit references to codes of conduct, or of action taken in relation to such codes, is only credited if the link to the code(s) of conduct is clear and unambiguous. | ATNI      | 2           | 3           | 2         | 1        | 1          | 3             |
| 363       | Does the company provide evidence of taking action in relation to such international voluntary codes of conduct? (see above metric)                                                                                       | Codes to include:<br>UN Guiding Principles on Business and Human Rights<br>Code of Ethics for International Trade in Food, adopted by the Codex Alimentarius<br>2016 FAO/OECD Guidance for Responsible Agricultural Supply Chains<br>Guiding Principles on Human Rights Impact Assessments of Trade and Investment Agreements<br>Principles for Responsible Investments in Agriculture and Food Systems<br>OECD Guidelines for Multinational Enterprises / OECD Due Diligence Guidance for Responsible Business Conduct<br>ILO Tripartite Declaration of Principles concerning Multinational Enterprises and Social Policy (MNE Declaration)<br>UN Global Compact<br><br>The company has provided examples related to three codes or more<br>The company has provided examples of one or two codes<br>No examples provided<br><br>In assessing this indicator, companies will be credited if they make an explicit reference to the international codes of conduct in their reporting, initiatives or other (internal or public)          | ATNI      | 2           | 3           | 2         | 2        | 1          | 2             |

| metric ID | Metric                                                                                                                                                                                                                                           | Details for Metric use   Scoring Criteria                                                                                                                                                                                                                                                                                                                                                                                                                                                                                                                                                                                                                                                               | Framework | Materiality | Objectivity | Alignment | Activity | Resolution | Verifiability |
|-----------|--------------------------------------------------------------------------------------------------------------------------------------------------------------------------------------------------------------------------------------------------|---------------------------------------------------------------------------------------------------------------------------------------------------------------------------------------------------------------------------------------------------------------------------------------------------------------------------------------------------------------------------------------------------------------------------------------------------------------------------------------------------------------------------------------------------------------------------------------------------------------------------------------------------------------------------------------------------------|-----------|-------------|-------------|-----------|----------|------------|---------------|
|           |                                                                                                                                                                                                                                                  | documentation. Implicit references to codes of conduct, or of action taken in relation to such codes, is only credited if the link to the code(s) of conduct is clear and unambiguous.                                                                                                                                                                                                                                                                                                                                                                                                                                                                                                                  |           |             |             |           |          |            |               |
| 364       | Does the company have partnerships with, or formally support any of the following international initiatives/organizations to address malnutrition in priority populations? (Tick all that apply)                                                 | <p>SUN Business Network<br/>World Food Program<br/>UNICEF<br/>Save the Children<br/>Zero Hunger Challenge<br/>GAIN<br/>Amsterdam Initiative against Malnutrition<br/>Other relevant organization</p> <p>For a partnership to be acknowledged in this indicator, the company is required to provide evidence of a significant in-kind or financial investment and a long-term commitment (a year or more). The list is not exhaustive, therefore the answer option 'Other relevant organization' is in place for other organizations which may include Action Against Hunger, Power of Nutrition, HarvestPlus and many more. For reporting purposes, please provide a complete list of partnerships.</p> | ATNI      | 2           | 2           | 1         | 1        | 1          | 2             |
| 365       | Can the company provide evidence of one-to-one discussions with key organizations working on malnutrition to solicit input on its commercial strategy/policy/approach?                                                                           | <p>Yes<br/>No<br/>No information</p> <p>Key organizations include SUN Business Network, World Food Program, UNICEF, Save the Children, Zero Hunger Challenge, GAIN, Amsterdam Initiative against Malnutrition, as well as FAO, Alive and thrive, etc.<br/>One-to-one meetings is regular dialogue, and meetings without promotional purpose. Being a member of these organizations is not sufficient.</p>                                                                                                                                                                                                                                                                                               | ATNI      | 2           | 2           | 1         | 2        | 1          | 2             |
| 366       | In the last 3 years, has the company undertaken research to demonstrate the efficacy of its portion control efforts on consumer behavior?                                                                                                        | <p>Yes, with evidence of efficacy (improvement of portion control)<br/>Yes, without evidence of efficacy<br/>No<br/>No information<br/>Not applicable</p> <p>This indicator applies to selected product categories that typically have a high sugar or energy content and low 'beneficial' nutrient density (confectionery, carbonated drinks, juice, sports &amp; energy drinks, Asian specialty drinks, savory snacks, ice creams).</p>                                                                                                                                                                                                                                                               | ATNI      | 2           | 2           | 1         | 3        | 1          | 2             |
| 367       | Does the company provide evidence of investment in research or new technologies that enables the development or improvement of products aimed at addressing the specific needs of priority populations, including undernutrition where relevant? | <p>Yes<br/>No<br/>No Information</p> <p>Additional information:<br/>This indicator focuses on R&amp;D investments that enables the development or improvement of products aimed at addressing priority populations, rather than the development of the products themselves. Relevant examples include research into: milder processing to retain more nutritional value in processed foods; (micro)nutrient deficiencies and bioavailability; new ways to do (bio)fortification; improved (refrigerated) distribution or packaging in low-resource settings to improve shelf life of fortified products.</p>                                                                                            | ATNI      | 1           | 2           | 1         | 2        | 1          | 2             |

| metric ID | Metric                                                                                                                                                                                                                          | Details for Metric use   Scoring Criteria                                                                                                                                                                                                                                                                                                                                                                                                                                                                                                                                                                                                                                                                                                                                                                                                                                                                                                                                                                                                                                                                                                                                                         | Framework | Materiality | Objectivity | Alignment | Activity | Resolution | Verifiability |
|-----------|---------------------------------------------------------------------------------------------------------------------------------------------------------------------------------------------------------------------------------|---------------------------------------------------------------------------------------------------------------------------------------------------------------------------------------------------------------------------------------------------------------------------------------------------------------------------------------------------------------------------------------------------------------------------------------------------------------------------------------------------------------------------------------------------------------------------------------------------------------------------------------------------------------------------------------------------------------------------------------------------------------------------------------------------------------------------------------------------------------------------------------------------------------------------------------------------------------------------------------------------------------------------------------------------------------------------------------------------------------------------------------------------------------------------------------------------|-----------|-------------|-------------|-----------|----------|------------|---------------|
| 368       | As part of its approach to addressing the needs of priority populations, has the company developed specific products in the last 3 years aimed at as the following age groups or other population groups: (Tick all that apply) | <p>Women of childbearing age<br/> Children between 6 – 36 months (complementary foods only)<br/> Children between 3 – 5 years<br/> Children over 5 years<br/> Elderly<br/> Other population groups (specify)<br/> Not applicable</p> <p>Additional information:<br/> Many factors or determinants can be relevant for the identification of priority populations as defined by public health authorities. This indicator focuses on age or life stages and how these relate to a high risk or burden of malnutrition compared to the general population. The indicator assesses whether companies address such age groups in their wider strategy to addressing the specific nutritional needs of priority populations with a focus on the formulation of products, for example by developing specifically formulated and/or fortified products that address nutritional deficiencies in undernourished populations or populations that are at particular risk.</p> <p>The focus of this indicator is on the R&amp;D effort related to developing new products or improving existing products. Therefore, companies are not scored for having products on the market for longer than 3 years.</p> | ATNI      | 1           | 2           | 1         | 3        | 1          | 2             |
| 369       | Does the company clearly articulate a commitment to grow through improving nutrition and health for all in the UK in its business strategy?                                                                                     | <p>Company has a strategy to grow through a focus on nutrition and health in the UK<br/> Company has no clear strategy but articulates some commitment to grow through a focus on nutrition and health<br/> No strategy /no information found</p> <p>A strategic focus on nutrition and health must be related to the company's core (commercial) business strategy. To be credited for the highest score, it is not mandatory that 'nutrition' and 'health' are explicitly mentioned, but it should be unambiguous that both elements are covered in the company's strategy.</p>                                                                                                                                                                                                                                                                                                                                                                                                                                                                                                                                                                                                                 | ATNI UK   | 3           | 2           | 1         | 1        | 1          | 3             |
| 370       | Does the strategy include a specific focus on encouraging adherence with the UK dietary guidelines?                                                                                                                             | <p>Yes<br/> No/no information found</p> <p>British people under consume food categories such as fruit and vegetables as well as potatoes, bread, rice, pasta and other starchy carbohydrates. Encouraging adherence with the Government Dietary Recommendations should thus be a priority.</p>                                                                                                                                                                                                                                                                                                                                                                                                                                                                                                                                                                                                                                                                                                                                                                                                                                                                                                    | ATNI UK   | 3           | 2           | 2         | 2        | 1          | 2             |
| 371       | Who has formal accountability for implementing the company's nutrition strategy and/or programme?                                                                                                                               | <p>CEO or other senior executive<br/> Committee that reports to the Board or an executive manager<br/> A less senior staff member<br/> No one/no information found</p> <p>Note that the accountable person is the individual who is ultimately answerable for the activity or decision. This includes 'yes' or 'no' authority and veto power. Only one accountable person can be assigned to an action.</p>                                                                                                                                                                                                                                                                                                                                                                                                                                                                                                                                                                                                                                                                                                                                                                                       | ATNI UK   | 3           | 3           | 1         | 2        | 1          | 2             |
| 372       | [UNSCORED] Is this accountability concretely linked to individuals' remuneration                                                                                                                                                | Remuneration of executive responsible specifically linked to performance on nutrition objectives                                                                                                                                                                                                                                                                                                                                                                                                                                                                                                                                                                                                                                                                                                                                                                                                                                                                                                                                                                                                                                                                                                  | ATNI UK   | 3           | 2           | 1         | 2        | 1          | 2             |

| metric ID | Metric                                                                                                                                       | Details for Metric use   Scoring Criteria                                                                                                                                                                                                                                                                                                                                                                                                                                                                                                                                                                                                                                                                                                                                                                                                                                                                                                                                                                                                                                                                                                                                                                                                                           | Framework | Materiality | Objectivity | Alignment | Activity | Resolution | Verifiability |
|-----------|----------------------------------------------------------------------------------------------------------------------------------------------|---------------------------------------------------------------------------------------------------------------------------------------------------------------------------------------------------------------------------------------------------------------------------------------------------------------------------------------------------------------------------------------------------------------------------------------------------------------------------------------------------------------------------------------------------------------------------------------------------------------------------------------------------------------------------------------------------------------------------------------------------------------------------------------------------------------------------------------------------------------------------------------------------------------------------------------------------------------------------------------------------------------------------------------------------------------------------------------------------------------------------------------------------------------------------------------------------------------------------------------------------------------------|-----------|-------------|-------------|-----------|----------|------------|---------------|
|           | arrangements in relation to targets or objectives?                                                                                           | Remuneration of executive responsible is linked to performance on corporate social responsibility (CSR) initiatives (nutrition clearly being part of those initiatives)<br>Only links senior managers' remuneration to performance on nutrition objectives<br>No link/no information found<br><br>This indicator is not scored; it is for information only.                                                                                                                                                                                                                                                                                                                                                                                                                                                                                                                                                                                                                                                                                                                                                                                                                                                                                                         |           |             |             |           |          |            |               |
| 373       | Does the company include in its risk register business risks explicitly linked to rising rates of obesity and diet-related diseases?         | Yes, multiple risks specified<br>Yes, only one risk specified<br>No/no information found<br><br>Examples of business risks related to rising rates of obesity and diet-related diseases include discussion of consumer demand for healthy diets, increasing regulation of products high in sugar, etc.<br><br>Additional information: Extensive risk assessment encompasses most elements of litigation risk, trend analysis, regulatory risk, market risk, specific category or brand risk and reputational risk. For example:<br><ul style="list-style-type: none"> <li>• future nutrition-related taxes;</li> <li>• impact of future potential nutrition-related litigation;</li> <li>• impact of future potential regulation of marketing of less healthy food products;</li> <li>• impact of future potential regulation of labelling and health and nutrition claims;</li> <li>• likelihood of loss of market share due to consumer concerns related to nutrition;</li> <li>• likelihood of significant loss of revenues due to consumers' changing buying habits towards healthier purchasing habits;</li> <li>• impact on reputation of poor performance on nutrition; and/or</li> <li>• impact on brand value of poor performance on nutrition.</li> </ul> | ATNI UK   | 2           | 2           | 1         | 2        | 1          | 2             |
| 374       | 5.2 [UNSCORED] Which risks are described?                                                                                                    | Changing consumer trends (e.g. towards healthier diets or plant-based diets)<br>Regulatory risk<br>Litigation risk<br>Reputation risk<br>Brand risk<br>Strategic/market/competitor risk<br>Global health risks (e.g. epidemics/pandemics)<br><br>This indicator is not scored; it is for information only.                                                                                                                                                                                                                                                                                                                                                                                                                                                                                                                                                                                                                                                                                                                                                                                                                                                                                                                                                          | ATNI UK   | 2           | 3           | 1         | 2        | 1          | 2             |
| 375       | Can the company provide evidence of a plan to deliver its nutrition strategy?                                                                | Yes, comprehensive and multi-year plan<br>Some evidence of plan<br>No/no information found<br><br>A comprehensive, holistic plan will deliver the company's strategy on nutrition/healthy diets/tackling childhood obesity. Information regarding this indicator can be shared under an NDA if the company wishes to do so.                                                                                                                                                                                                                                                                                                                                                                                                                                                                                                                                                                                                                                                                                                                                                                                                                                                                                                                                         | ATNI UK   | 2           | 1           | 1         | 2        | 1          | 2             |
| 376       | Can the company provide evidence of having used research, in the past three years, to address nutrition needs of priority population groups? | Yes<br>No/no information found<br><br>Companies should address, in their research, priority groups determined by public authorities in the UK. ATNI defines such groups as priority population groups. For instance, part one of the                                                                                                                                                                                                                                                                                                                                                                                                                                                                                                                                                                                                                                                                                                                                                                                                                                                                                                                                                                                                                                | ATNI UK   | 2           | 2           | 1         | 3        | 1          | 2             |



| metric ID | Metric                                                                                                                                                   | Details for Metric use   Scoring Criteria                                                                                                                                                                                                                                                                                                                                                                                                                                                                                                                                                                                                                                                                                                                                                                                                                                                                                                                                                                                                                                                                                                                                                                                                                                                                                                                                                                                                                                                                                                                                                                                                                                  | Framework | Materiality | Objectivity | Alignment | Activity | Resolution | Verifiability |
|-----------|----------------------------------------------------------------------------------------------------------------------------------------------------------|----------------------------------------------------------------------------------------------------------------------------------------------------------------------------------------------------------------------------------------------------------------------------------------------------------------------------------------------------------------------------------------------------------------------------------------------------------------------------------------------------------------------------------------------------------------------------------------------------------------------------------------------------------------------------------------------------------------------------------------------------------------------------------------------------------------------------------------------------------------------------------------------------------------------------------------------------------------------------------------------------------------------------------------------------------------------------------------------------------------------------------------------------------------------------------------------------------------------------------------------------------------------------------------------------------------------------------------------------------------------------------------------------------------------------------------------------------------------------------------------------------------------------------------------------------------------------------------------------------------------------------------------------------------------------|-----------|-------------|-------------|-----------|----------|------------|---------------|
|           |                                                                                                                                                          | National Food Strategy (2020) found that people on lower incomes in the UK are a third less likely to consume their 5-a-day.                                                                                                                                                                                                                                                                                                                                                                                                                                                                                                                                                                                                                                                                                                                                                                                                                                                                                                                                                                                                                                                                                                                                                                                                                                                                                                                                                                                                                                                                                                                                               |           |             |             |           |          |            |               |
| 377       | Does the company commit to the following through a lobbying policy or code of conduct?                                                                   | <p>Only engaging with governments, political parties, policymakers and policymaking bodies in support of measures to improve health and nutrition, consistent with the public interest</p> <p>Only engaging in lobbying activities that support an evidence-based approach to policymaking, with the emphasis on independent, peer-reviewed science</p> <p>Measures preventing bribery and corruption in its relations with public officials, including the offering and receiving of gifts, hospitality or other financial and in-kind incentives</p> <p>Ensuring that its lobbying activities respect public policy frameworks developed by international agencies, national and / or sub-national governments, and standard-setting bodies</p> <p>No/no information found</p> <p>Tick all that apply with a maximum score of 10 points.</p> <p>Companies should embody in their policies and practices the principles within the Responsible Lobbying Framework.</p>                                                                                                                                                                                                                                                                                                                                                                                                                                                                                                                                                                                                                                                                                                    | ATNI UK   | 3           | 2           | 1         | 1        | 1          | 3             |
| 378       | Has the company explicitly stated that it would welcome or not oppose regulatory action to address the obesity and diet-related health issues in the UK? | <p>Yes, without reservations</p> <p>Yes, with some reservations</p> <p>No/no information found</p>                                                                                                                                                                                                                                                                                                                                                                                                                                                                                                                                                                                                                                                                                                                                                                                                                                                                                                                                                                                                                                                                                                                                                                                                                                                                                                                                                                                                                                                                                                                                                                         | ATNI UK   | 2           | 1           | 1         | 1        | 1          | 3             |
| 379       | Does the company participate in initiatives that aim to address the UK's nutrition challenges?                                                           | <p>PHE's Change4Life campaign</p> <p>Pledge to the Food Foundation's Peas Please initiative</p> <p>Working with Consumer Goods Forum trials through the CHL initiative</p> <p>Veg Power support (Eat them to defeat them)</p> <p>PHE 5-a-day</p> <p>Other non-commercial third-party initiatives (please specify)</p> <p>No engagement to any such initiative/no information found</p> <p>Note that this indicator can score a maximum of 20 points.</p> <p>PHE Change4Life Campaign aims to help families lead healthier lives by eating well and moving more. Supported by retailers, it encourages parents to look for '100 calorie snacks, two a day max' to help them purchase healthier snacks than the ones they currently buy.</p> <p>The Peas Please Initiative aims to secure commitments from industry and government to improve the availability, acceptability (including convenience), affordability, and quality of the vegetable offer in shops, schools, restaurants and beyond, and in turn stimulate increased vegetable consumption among the UK public, particularly children and those on low incomes.</p> <p>The Consumer Goods Forum's Collaboration for Healthier Lives UK (CHL UK) initiative brings together retailers, manufacturers and other key stakeholders in Lambeth and Southwark to help customers and employees understand, access and afford healthier options, while also ensuring shared value for business and communities.</p> <p>Veg Power's mission is to inspire children to vegetable-loving habits they will share with their parents today and their own children tomorrow. In 2018 Veg Power formed a key partnership</p> | ATNI UK   | 3           | 2           | 1         | 2        | 1          | 2             |

| metric ID | Metric                                                                                                                                                                                                                                                                                                                                                                       | Details for Metric use   Scoring Criteria                                                                                                                                                                                                                                                                                                                                                                                                                                                                                                                                                                                                                                                                                                                                                                | Framework   | Materiality | Objectivity | Alignment | Activity | Resolution | Verifiability |
|-----------|------------------------------------------------------------------------------------------------------------------------------------------------------------------------------------------------------------------------------------------------------------------------------------------------------------------------------------------------------------------------------|----------------------------------------------------------------------------------------------------------------------------------------------------------------------------------------------------------------------------------------------------------------------------------------------------------------------------------------------------------------------------------------------------------------------------------------------------------------------------------------------------------------------------------------------------------------------------------------------------------------------------------------------------------------------------------------------------------------------------------------------------------------------------------------------------------|-------------|-------------|-------------|-----------|----------|------------|---------------|
|           |                                                                                                                                                                                                                                                                                                                                                                              | with ITV and together created the Eat Them to Defeat Them campaign, which first ran in 2019 making vegetables fun for kids.<br><br>The government recommends that we eat at least five portions of a variety of fruit and vegetables per day. The government's 5-a-day logo has been developed to help people recognise the 5-a-day message and to introduce consistency in the message in all settings.                                                                                                                                                                                                                                                                                                                                                                                                 |             |             |             |           |          |            |               |
| 380       | Does the company publish its policy position (in relation to government policy, where government policy exists) on product reformulation?<br><br>OR<br><br>Does the company engage with government activities in relation to product reformulation (where they exist, e.g. PPPs such as Healthy Food Partnership in Australia and where company is eligible to participate)? | 10: Yes, on own website<br>5: Yes, on industry association website<br>0: Not publicly available<br><br>OR<br><br>10: Yes, actively engaged<br>5: Yes, but only in general terms<br>0: Not engaged                                                                                                                                                                                                                                                                                                                                                                                                                                                                                                                                                                                                        | BIA-Obesity | 2           | 3           | 1         | 2        | 1          | 3             |
| 381       | Does the company's policy position support WHO's position on product reformulation in relation to nutrients of concern, as articulated in the Global Action Plan for the Prevention and Control of NCDs 2013-2020                                                                                                                                                            | 10: Support for government-led efforts to reformulate the food supply in relation to nutrients of concern (including salt)<br>5: Support for government-led efforts to reformulate the food supply in relation to only sodium/salt<br>0: No details available<br>-10: Opposed to government-led efforts to reformulate the food supply in relation to nutrients of concern                                                                                                                                                                                                                                                                                                                                                                                                                               | BIA-Obesity | 2           | 2           | 3         | 1        | 1          | 3             |
| 382       | Does the company have an overarching commitment to improving population nutrition and health articulated in strategic documents (e.g., corporate strategy document, corporate responsibility reports)?                                                                                                                                                                       | 10: Yes, a specific national-level (country-specific) commitment to improving population nutrition and health, publicly available in strategic documents<br>7.5: Yes, a specific global-level (not country-specific) commitment to improving population nutrition and health, publicly available in strategic documents<br>5: Yes, a national- or global-level commitment, but not publicly-available, OR general reference to nutrition and health as part of general corporate strategy<br>0: No clear commitments to improving population nutrition and health                                                                                                                                                                                                                                        | BIA-Obesity | 3           | 2           | 1         | 1        | 1          | 2             |
| 383       | Does the company's commitment to improving population nutrition and health (where it exists) include specific objectives and targets for obesity and NCDs?<br><br>Can be multiple, max of 10 points (Give 1 point instead of 2 for each component if specified globally but not nationally)                                                                                  | 2: Contains specific, measurable, achievable, relevant and time bound (SMART) objectives and targets<br>2: Recognition or reference to relevant priorities set out in the WHO Global Action Plan for the Prevention and Control of NCDs 2013-2020, Sustainable Development Goals, or the WHO Report on Ending Childhood Obesity<br>2: Recognition or reference to relevant priorities in national government policy documents relating to population nutrition and obesity/NCD prevention (N/A if there is not a relevant government policy)<br>2: Comprehensive in nature (e.g., includes three or more domains in this document, such as formulation, marketing and labelling)<br>2: Key Performance Indicators (KPIs) (and/or remuneration) of management linked to nutrition strategy/policy/targets | BIA-Obesity | 2           | 2           | 2         | 1        | 1          | 3             |
| 384       | Does the company regularly publish details of its approach to population nutrition and health related to obesity and NCDs?                                                                                                                                                                                                                                                   | 10: Annual, publicly available national reports including reporting against objectives and targets, a clear outlook of future plans and challenges, external verification / review, and specifically relate to the country in question                                                                                                                                                                                                                                                                                                                                                                                                                                                                                                                                                                   | BIA-Obesity | 2           | 2           | 1         | 2        | 1          | 3             |

| metric ID | Metric                                                                                                                                                                                                                                                                                                                                                      | Details for Metric use   Scoring Criteria                                                                                                                                                                                                                                                                                                                                                                                                                                                                                                  | Framework   | Materiality | Objectivity | Alignment | Activity | Resolution | Verifiability |
|-----------|-------------------------------------------------------------------------------------------------------------------------------------------------------------------------------------------------------------------------------------------------------------------------------------------------------------------------------------------------------------|--------------------------------------------------------------------------------------------------------------------------------------------------------------------------------------------------------------------------------------------------------------------------------------------------------------------------------------------------------------------------------------------------------------------------------------------------------------------------------------------------------------------------------------------|-------------|-------------|-------------|-----------|----------|------------|---------------|
|           |                                                                                                                                                                                                                                                                                                                                                             | 7.5: Annual, publicly available global reports that are not clear whether or not they include the country in question<br>5: Annual reports including some of the relevant information, available upon request<br>2.5: Irregular reporting<br>0: None published                                                                                                                                                                                                                                                                             |             |             |             |           |          |            |               |
| 385       | Does the company publish details of the professional organisations (e.g., professional associations for nutrition or dietetics, physical activity or exercise organisations, medical organisations or societies, etc.) and/or scientific events (e.g., conferences) it funds or supports, including awards/prizes, making clear the nature of that support? | 10: Yes, information on national-level activity is publicly available (website or document) in a consolidated and cumulative form<br>5: Yes, information is available, but is not consolidated and easy to locate OR information is available at the global level only OR comprehensive information about their activities in the area provided to the project team<br>0: No information available / provided<br>n/a: Active declaration/policy stating no activity in this area (either publicly available or disclosed to INFORMAS team) | BIA-Obesity | 2           | 3           | 1         | 2        | 1          | 2             |
| 386       | Does the company publish details of the external research (e.g., conducted by individuals/groups/organisations) it funds or supports, including awards/prizes?                                                                                                                                                                                              | 10: Yes, information on national-level activity is publicly available (website or document) in a consolidated and cumulative form<br>5: Yes, information is available, but is not consolidated and easy to locate OR information is available at the global level only OR comprehensive information about their activities in the area provided to the project team<br>0: No information available / provided<br>n/a: Active declaration/policy stating no activity in this area (either publicly available or disclosed to INFORMAS team) | BIA-Obesity | 2           | 3           | 1         | 2        | 1          | 2             |
| 387       | For philanthropic funding, does the company publish details of the groups or organisations it funds or supports?                                                                                                                                                                                                                                            | 10: Yes, information on national-level activity is publicly available (website or document) in a consolidated and cumulative form<br>5: Yes, information is available, but is not consolidated and easy to locate OR information is available at the global level only OR comprehensive information about their activities in the area provided to the project team<br>0: No information available / provided<br>n/a: Active declaration/policy stating no activity in this area (either publicly available or disclosed to INFORMAS team) | BIA-Obesity | 2           | 3           | 1         | 2        | 1          | 2             |
| 388       | Does the company publish details of the nutrition education / healthy diet oriented programs it funds or supports?                                                                                                                                                                                                                                          | 10: Yes, information on national-level activity is publicly available (website or document) in a consolidated and cumulative form<br>5: Yes, information is available, but is not consolidated and easy to locate OR information is available at the global level only OR comprehensive information about their activities in the area provided to the project team<br>0: No information available / provided<br>n/a: Active declaration/policy stating no activity in this area (either publicly available or disclosed to INFORMAS team) | BIA-Obesity | 2           | 3           | 1         | 2        | 1          | 2             |
| 389       | For nutrition education / health diet oriented programs, does the company have a commitment to align programs to national or regional dietary guidelines?                                                                                                                                                                                                   | information only, not scored                                                                                                                                                                                                                                                                                                                                                                                                                                                                                                               | BIA-Obesity | 3           | 2           | 1         | 1        | 1          | 3             |
| 390       | Does the company publish details of the active lifestyle programs (sports, physical activity) it funds or supports?                                                                                                                                                                                                                                         | "10: Yes, information on national-level activity is publicly available (website or document) in a consolidated and cumulative form<br>5: Yes, information is available, but is not consolidated and easy to locate OR information is available at the global level only OR comprehensive information about their activities in the area provided to the project team<br>0: No information available / provided                                                                                                                             | BIA-Obesity | 2           | 3           | 1         | 2        | 1          | 2             |

| metric ID | Metric                                                                                                                                                                                                                                                                                                                            | Details for Metric use   Scoring Criteria                                                                                                                                                                                                                                                                                                                                                                                                                                                                                                    | Framework   | Materiality | Objectivity | Alignment | Activity | Resolution | Verifiability |
|-----------|-----------------------------------------------------------------------------------------------------------------------------------------------------------------------------------------------------------------------------------------------------------------------------------------------------------------------------------|----------------------------------------------------------------------------------------------------------------------------------------------------------------------------------------------------------------------------------------------------------------------------------------------------------------------------------------------------------------------------------------------------------------------------------------------------------------------------------------------------------------------------------------------|-------------|-------------|-------------|-----------|----------|------------|---------------|
|           |                                                                                                                                                                                                                                                                                                                                   | n/a: Active declaration/policy stating no activity in this area (either publicly available or disclosed to INFORMAS team)"                                                                                                                                                                                                                                                                                                                                                                                                                   |             |             |             |           |          |            |               |
| 391       | Does the company publish details of its involvement in public-private partnerships and/or joint ventures with government organisations / agencies? (in addition to those covered as part of M-RELAT4.1 and M-RELAT5)                                                                                                              | "10: Yes, information on national-level activity is publicly available (website or document) in a consolidated and cumulative form<br>5: Yes, information is available, but is not consolidated and easy to locate OR information is available at the global level only OR comprehensive information about their activities in the area provided to the project team<br>0: No information available / provided<br>n/a: Active declaration/policy stating no activity in this area (either publicly available or disclosed to INFORMAS team)" | BIA-Obesity | 2           | 3           | 1         | 2        | 1          | 2             |
| 392       | Does the company publish details of its political donations? (when not prohibited by government policy)                                                                                                                                                                                                                           | 10: Yes, information on national-level activity is publicly available (on a company website or document) OR declaration of no activity in this area<br>0: No                                                                                                                                                                                                                                                                                                                                                                                 | BIA-Obesity | 2           | 3           | 1         | 2        | 1          | 3             |
| 393       | Does the company publish its membership / support for / ownership of industry associations, think tanks, interest groups, community organisations or other organisations that lobby in relation to population nutrition and/or obesity and NCD issues?                                                                            | "10: Yes, information on national-level activity is publicly available (website or document) in a consolidated and cumulative form<br>5: Yes, information is available, but is not consolidated and easy to locate OR information is available at the global level only OR comprehensive information about their activities in the area provided to the project team<br>0: No information available / provided<br>n/a: Active declaration/policy stating no activity in this area (either publicly available or disclosed to INFORMAS team)" | BIA-Obesity | 2           | 3           | 1         | 2        | 1          | 3             |
| 394       | Does the company have written policy and guidelines related to any of the above (funding or support for professional organisations, external research, philanthropic funding, nutrition education / healthy diet oriented programs, active lifestyle programs), including details of how it will be involved in these activities? | [Information only, not to be scored]                                                                                                                                                                                                                                                                                                                                                                                                                                                                                                         | BIA-Obesity | 3           | 3           | 1         | 2        | 2          | 3             |
| 395       | Does the company's policy position support WHO's position on product reformulation in relation to nutrients of concern, as articulated in the Global Action Plan for the Prevention and Control of NCDs 2013-2020                                                                                                                 | 10: Support for government-led efforts to reformulate the food supply in relation to nutrients of concern (including salt)<br>5: Support for government-led efforts to reformulate the food supply in relation to only sodium/salt<br>0: No details available<br>-10: Opposed to government-led efforts to reformulate the food supply in relation to nutrients of concern                                                                                                                                                                   | BIA-Obesity | 2           | 2           | 3         | 2        | 1          | 3             |
| 396       | Does the company publish its membership / support for / ownership of industry associations, think tanks, interest groups, community organisations or other organisations that lobby in relation to population nutrition and/or obesity and NCD issues?                                                                            | 10: Yes, information on national-level activity is publicly available (website or document) in a consolidated and cumulative form<br>5: Yes, information is available, but is not consolidated and easy to locate OR information is available at the global level only OR comprehensive information about their activities in the area provided to the project team<br>0: No information available / provided<br>n/a: Active declaration/policy stating no activity in this area (either publicly available or disclosed to INFORMAS team)"  | BIA-Obesity | 2           | 3           | 1         | 2        | 1          | 2             |
| 397       | Does the company publish its policy position (in relation to government policy, where                                                                                                                                                                                                                                             | 10: Yes, on own website<br>5: Yes, on industry association website<br>0: Not publicly available                                                                                                                                                                                                                                                                                                                                                                                                                                              | BIA-Obesity | 2           | 3           | 1         | 2        | 1          | 3             |

| metric ID | Metric                                                                                                                                                                                                                                                                                                      | Details for Metric use   Scoring Criteria                                                                                                                                                                                                                                                                                                                                                                                                                                                                                                                                                                                                                                                                                                                                                                                                                                                                                                                                                                                                                                                                                                                                                                                                                                                                                                                                                                  | Framework   | Materiality | Objectivity | Alignment | Activity | Resolution | Verifiability |
|-----------|-------------------------------------------------------------------------------------------------------------------------------------------------------------------------------------------------------------------------------------------------------------------------------------------------------------|------------------------------------------------------------------------------------------------------------------------------------------------------------------------------------------------------------------------------------------------------------------------------------------------------------------------------------------------------------------------------------------------------------------------------------------------------------------------------------------------------------------------------------------------------------------------------------------------------------------------------------------------------------------------------------------------------------------------------------------------------------------------------------------------------------------------------------------------------------------------------------------------------------------------------------------------------------------------------------------------------------------------------------------------------------------------------------------------------------------------------------------------------------------------------------------------------------------------------------------------------------------------------------------------------------------------------------------------------------------------------------------------------------|-------------|-------------|-------------|-----------|----------|------------|---------------|
|           | government policy exists) on own-brand product reformulation?<br><br>OR<br><br>Does the company engage with government activities in relation to own-brand product reformulation (where they exist, e.g., PPPs such as Healthy Food Partnership in Australia and where company is eligible to participate)? | OR<br><br>10: Yes, actively engaged<br>5: Yes, but only in general terms<br>0: Not engaged                                                                                                                                                                                                                                                                                                                                                                                                                                                                                                                                                                                                                                                                                                                                                                                                                                                                                                                                                                                                                                                                                                                                                                                                                                                                                                                 |             |             |             |           |          |            |               |
| 398       | For philanthropic funding, does the company publish details of the groups or organisations it funds or supports?                                                                                                                                                                                            | 10: Yes, information on national-level activity is publicly available (website or document) in a consolidated and cumulative form<br>5: Yes, information is available, but is not consolidated and easy to locate OR information is available at the global level only OR comprehensive information about their activities in the area provided to the project team<br>0: No information available / provided<br>n/a: Active declaration/policy stating no activity in this area (either publicly available or disclosed to INFORMAS team)                                                                                                                                                                                                                                                                                                                                                                                                                                                                                                                                                                                                                                                                                                                                                                                                                                                                 | BIA-Obesity | 2           | 3           | 1         | 2        | 1          | 3             |
| 399       | Food processing companies should provide clarity and specific detail on any lobbying activities related to the subsidized or otherwise advantaged production of key product ingredients within their organization                                                                                           | Report the context of any lobbying activities related to subsidized or otherwise advantaged production (for example, lobbying by food processing companies to influence agricultural legislation).                                                                                                                                                                                                                                                                                                                                                                                                                                                                                                                                                                                                                                                                                                                                                                                                                                                                                                                                                                                                                                                                                                                                                                                                         | GRI-Food    | 3           | 2           | 1         | 2        | 2          | 2             |
| 400       | Nature, scope and effectiveness of any programs and practices that promote access to healthy lifestyles; the prevention of chronic disease; access to healthy, nutritious and affordable food; and improved welfare for communities in need                                                                 | Steps required to report:<br>1. Identify community needs which may be addressed through the reporting organization's specific expertise as a food-processing company (e.g., special dietary needs or deficiencies), in communities where they reporting organization has operations or material supply chain interests, or other identified interests. Where possible, the needs should be independently identified (relevant authority such as recipient government or UN agencies).<br>2. Using the information identified in 1), identify any programs and practices (in-kind contributions, volunteer initiatives, knowledge transfer, partnerships and product development) that promote healthy lifestyles; the prevention of chronic disease; access to healthy, nutritious and affordable food; and improved welfare for communities in need<br>3. Identify evidence that the programs and practices identified in 2) effectively respond to the needs identified in 1), including a description of how the effectiveness is assessed.<br>4. report the nature, scope and effectiveness of any programs and practices (in-kind contributions, volunteer initiatives, knowledge transfer, partnerships and product development) that promote healthy lifestyles; the prevention of chronic disease; access to healthy, nutritious and affordable food; and improved welfare for communities in need | GRI-Food    | 3           | 2           | 1         | 2        | 2          | 1             |
| 401       | Percentage/total number of significant product and service categories for which health and safety impacts are assessed for improvement                                                                                                                                                                      | report the procedures (and steps taken as a result of such procedures) and results of steps taken. Assessments of products and services (including packaging) should also account for social and environmental impacts. This is especially relevant in the food processing sector, given the downstream reach of the value chains of the food processing sector. Assessment of upstream impacts are covered in the sector specific Guidance for DMA for the procurement/Sourcing practices aspect.                                                                                                                                                                                                                                                                                                                                                                                                                                                                                                                                                                                                                                                                                                                                                                                                                                                                                                         | GRI-Food    | 2           | 1           | 1         | 3        | 3          | 1             |



**REFERENCES**

1. Global Reporting Initiative. (2021). Download the Standards. Available at: <https://www.globalreporting.org/standards/download-the-standards/> Accessed May 20, 2021
2. Sustainability Accounting Standards Board. (2021). Download SASB Standards. Available at: <https://www.sasb.org/standards/download/>
3. Access to Nutrition Initiative Available at: <https://accesstonutrition.org/> Accessed May 12, 2021
4. Food and Agriculture Benchmark, World Benchmarking Alliance. (2021). Available at: <https://www.worldbenchmarkingalliance.org/food-and-agriculture-benchmark/> Accessed May 12, 2021
5. The Food Foundation. Plating Up Progress. Available at: <https://foodfoundation.org.uk/plating-up-progress-home-page/> Accessed May 12, 2021
6. INFORMAS. (2022). What is INFORMAS? Available at: <https://www.informas.org/about-informas/>
